# Supplementary material for: Amitriptyline blocks innate immune responses mediated by toll‐like receptor 4 and IL‐1 receptor: Preclinical and clinical evidence in osteoarthritis and gout
Source: PubMed Central journal article supplement — Br J Pharmacol. 2021 Dec 12;179(2):270–86. doi: 10.1111/bph.15707 (PMC9300168; doi:10.1111/bph.15707), 2021-12-12
Supplement: BPH-179-270-s003.pdf [file BPH-179-270-s003.pdf]

| Proteome Control | Proteome AT | Proteome LPS | Proteome LPS+AT | Proteome IL1B | Proteome IL1B+AT | Secretome Control | Secretome AT | Secretome LPS | Secretome LPS+AT | Secretome IL1B | Secretome IL1B+AT |
|------------------|-------------|--------------|-----------------|---------------|------------------|-------------------|--------------|---------------|------------------|----------------|-------------------|
| Q15149           | Q15149      | Q15149       | Q15149          | Q15149        | Q15149           | P35908            | P35908       | P35908        | P35908           | P35908         | P35908            |
| Q09666           | Q09666      | Q09666       | Q09666          | Q09666        | Q09666           | P04264            | P04264       | P02768        | P04264           | P04264         | P04264            |
| P21333           | P21333      | P21333       | P21333          | P21333        | P21333           | P08123            | P02768       | P04264        | P13645           | P02768         | P02768            |
| P35579           | P35579      | P35579       | P35579          | P35579        | P35579           | P13645            | P13645       | P13645        | P02768           | P13645         | P13645            |
| O43707           | P08670      | P12111       | P08670          | Q00610        | Q00610           | P02768            | P02751       | P36222        | P08123           | P08123         | P08123            |
| Q14204           | P12111      | Q00610       | P12111          | Q9Y490        | O43707           | P36222            | P35527       | P08123        | P36222           | P36222         | P36222            |
| Q00610           | Q00610      | P02545       | Q00610          | O43707        | Q14204           | P35527            | P08123       | P02647        | P35527           | P02647         | P02647            |
| P12111           | P02545      | O43707       | Q9Y490          | P02545        | P08670           | P02647            | P36222       | P01023        | P02647           | P35527         | P35527            |
| P14618           | Q9Y490      | P08670       | P02545          | P14618        | Q9NZM1           | P12109            | P02647       | P12109        | P02751           | P12109         | P12109            |
| P02545           | Q99715      | Q14204       | O43707          | P08670        | P02545           | P02751            | P12109       | P35527        | P12109           | P01023         | P15582            |
| Q9Y490           | O43707      | Q9Y490       | P14618          | P08238        | Q9Y490           | P68871            | P01023       | P02751        | P02452           | P08254         | P02751            |
| P08670           | P14618      | P14618       | P08238          | P12111        | P14618           | Q99715            | P03956       | Q15582        | P13647           | P68871         | P24821            |
| Q9NZM1           | Q14204      | P08238       | P46940          | P46940        | P12111           | P02533            | P13647       | P09486        | P02533           | P02751         | P01023            |
| Q99715           | Q9NZM1      | P46940       | Q14204          | Q14204        | P46940           | P01023            | P02533       | P07585        | P07585           | P02533         | P08254            |
| P46940           | P18206      | P07237       | P07237          | P07237        | P08238           | P07585            | P68871       | P26022        | P01023           | P07585         | P02452            |
| P07900           | P24821      | P18206       | P11021          | P06733        | P06733           | P09486            | P09486       | P51884        | P68871           | P09486         | Q99715            |
| P24821           | P46940      | Q99715       | P24821          | P07355        | Q01082           | Q15582            | P51884       | Q99715        | Q15582           | P02452         | P02533            |
| P07355           | P08238      | P26038       | P18206          | P18206        | P26038           | P07996            | P02452       | P68871        | P01024           | Q15582         | P07585            |
| Q01082           | P07355      | P07355       | Q13813          | Q14697        | P07355           | P02452            | P63261       | P08254        | Q99715           | P03956         | P68871            |
| P07237           | P06733      | P11021       | P26038          | Q01082        | P24821           | P13647            | P01857       | P02533        | P09486           | P07996         | P03956            |
| P14625           | P07237      | Q9NZM1       | P06733          | Q13813        | Q9P2E9           | P01024            | P07585       | P13647        | P03956           | P02461         | P09486            |
| P26038           | P11021      | P06733       | P30101          | P11021        | Q99715           | P51884            | P01024       | P01857        | P19823           | P51884         | P07996            |
| P11021           | Q13813      | Q13813       | Q01082          | P26038        | P18206           | P48668            | P08670       | P02452        | P51884           | P01857         | P26022            |
| P06733           | P26038      | Q01082       | P07355          | P08133        | P07237           | P02461            | P07093       | P02461        | P07093           | P26022         | P01024            |
| P04264           | P13639      | P24821       | Q9P2E9          | P24821        | P11021           | P63261            | P04745       | P07996        | P07996           | P13647         | P51884            |
| P08133           | Q9P2E9      | P14625       | Q9NZM1          | P14625        | Q13813           | P04745            | P69905       | P01024        | P08254           | P63261         | P01857            |
| P18206           | Q14764      | P13639       | P04083          | P30101        | Q14764           | P01857            | P02788       | P07093        | P69905           | P04745         | P13647            |
| Q14697           | P08133      | P08133       | P13639          | P13639        | P13639           | P12110            | P01009       | P26022        | P01024           | P16270         | Q16270            |
| Q13813           | P04083      | P63261       | P14625          | Q9NZM1        | P35228           | P19823            | P07355       | P04745        | P02771           | P69905         | P63261            |
| P13639           | P60709      | Q14764       | Q14697          | Q9P2E9        | P11216           | Q16270            | P07996       | P19961        | P01857           | P19823         | P19823            |
| Q14764           | P14625      | P04083       | F60709          | Q99715        | P14625           | P69905            | Q15582       | Q04746        | P02765           | Q99715         | P02461            |
| P04075           | Q01082      | Q14697       | Q14764          | P55072        | P00558           | P26022            | P48668       | P19823        | P24821           | Q16270         | P69905            |
| P00558           | P11142      | Q9P2E9       | P08133          | P04075        | P30101           | P24821            | O43707       | P63261        | P04745           | P07093         | P07093            |
| P00338           | Q14697      | P11142       | P11142          | P11142        | P60709           | P63261            | Q08380       | P60709        | P02461           | P01009         | P48668            |
| P04083           | P30101      | P30101       | Q07065          | P04083        | P08133           | P02771            | Q99715       | P02538        | Q06033           | P04259         | P04745            |
| P60709           | P00558      | P00558       | F55072          | P00558        | P11142           | P49747            | P19823       | P48668        | P48668           | P02771         | P21810            |
| P08758           | P04075      | P67936       | Q99715          | P11142        | Q04083           | Q06033            | Q06033       | Q02461        | Q16270           | P01859         | P02788            |
| P30101           | P04406      | P08758       | P04075          | P35228        | Q14697           | P02765            | Q16270       | P02788        | P01009           | P21810         | P01009            |
| P04406           | P00338      | P42224       | P42224          | Q14764        | P07437           | P01009            | P26022       | P07996        | P35555           | P12110         | P49747            |
| P06396           | P55072      | P07437       | P00558          | P08758        | P04075           | Q5VTE0            | Q06033       | P21810        | P63261           | Q06033         | P01008            |
| P07437           | Q07065      | Q07065       | P11216          | Q07065        | P08758           | Q12841            | P62937       | P69905        | P12110           | P00738         | P05452            |
| P11216           | P08758      | P00338       | P67936          | P04406        | P67936           | P05543            | P49747       | Q12841        | P13646           | P24821         | P12110            |
| Q9P2E9           | P07437      | P55072       | P07437          | P11216        | P53621           | P21810            | P02771       | P12110        | P05452           | Q5VTE0         | P02765            |
| P11142           | P68363      | P04075       | P00338          | P07437        | Q07065           | P13646            | P01859       | P49747        | P02788           | P00736         | P02771            |
| P68363           | P06396      | P0DMV9       | P04264          | P00338        | P06396           | P18065            | Q5VTE0       | Q06033        | P05121           | P02763         | P02787            |
| P12814           | Q15582      | P04264       | P0DMV9          | P22314        | P55072           | P01859            | P02765       | P01859        | P49747           | Q96DA0         | Q12841            |
| P67936           | O75369      | P04406       | P08758          | P0DMV9        | P0DMV9           | Q12805            | P21810       | P02788        | Q5VTE0           | P02788         | P01876            |
| Q07065           | P0DMV9      | Q00159       | P04406          | Q5VTE0        | P04406           | P35555            | P04083       | P01008        | P01859           | P05452         | Q12805            |
| O60701           | P78527      | Q71U36       | O75369          | P68363        | P60174           | P01008            | P02787       | P05109        | P01008           | Q92743         | P36955            |
| P60174           | P04264      | P11216       | P22314          | P06396        | P07339           | P06396            | P23284       | P05543        | P05543           | P06702         | P31025            |
| Q04446           | Q05682      | P12814       | P29401          | P04179        | P04264           | P00747            | P24821       | P19099        | P09871           | P05109         | Q92743            |
| P29401           | P68871      | Q86VP6       | Q15582          | P53621        | P00338           | P05121            | P60174       | Q5VTE0        | Q12841           | P01008         | P18065            |
| O75369           | P67936      | O94832       | P12814          | O60701        | P22314           | P05452            | P00736       | P68104        | P23142           | Q12841         | P23142            |
| P07686           | Q00159      | P53621       | Q04446          | P04264        | O75369           | P31151            | P02763       | Q05639        | P01033           | P18065         | P08697            |
| P08238           | P22314      | P60174       | P78527          | P50454        | P29401           | O14498            | P31025       | P05452        | P06396           | P02787         | P02763            |
| P25705           | Q16555      | P25705       | P06396          | P12814        | O60701           | Q04695            | Q92743       | P01033        | Q12805           | P49747         | P35555            |
| P0DMV9           | P23284      | P07900       | P68363          | P29401        | Q04446           | P02652            | P00738       | P05543        | P00738           | P36955         | P00747            |
| Q00159           | P07900      | P04179       | P53621          | P60174        | Q15582           | P02788            | P36955       | P02753        | P04114           | P13646         | Q06033            |
| P22314           | P29401      | P06396       | P07900          | P04843        | P04843           | P01834            | P00558       | P02763        | P07355           | O14498         | P02753            |

|        |        |        |        |        |        |        |        |         |        |             |        |
|--------|--------|--------|--------|--------|--------|--------|--------|---------|--------|-------------|--------|
| P10809 | P60174 | O75083 | O60701 | O75083 | P12814 | Q08629 | Q9Y490 | Q92743  | Q96DA0 | Q12805      | P05543 |
| P42224 | O60701 | P04843 | P10809 | Q9NZN4 | Q71U36 | P23142 | P29401 | P19827  | P12814 | P01011      | P06396 |
| P04843 | P25705 | O60701 | P60174 | P10809 | P25705 | P01011 | P23142 | Q06828  | Q92743 | P01033      | P59666 |
| O94832 | P12814 | Q15582 | P20591 | P07900 | O00159 | P02753 | P05109 | P01876  | P01834 | P05543      | P02749 |
| P07339 | P42224 | P29401 | Q5VTE0 | P68871 | P68104 | P39059 | Q12841 | P01877  | P00747 | P98066      | P01859 |
| P68871 | P11216 | P50454 | P04843 | P67936 | P68871 | P06702 | P01008 | P18065  | P00734 | P02753      | P05121 |
| P50454 | P26641 | P07339 | P25705 | P07339 | P78527 | P02749 | P11021 | P35555  | P01876 | P05121      | P13646 |
| Q05682 | P50454 | Q5VTE0 | P13797 | P25705 | P36871 | P00736 | P06733 | P03956  | P02753 | P29508      | P01033 |
| P27797 | P04843 | P27797 | P07339 | P27797 | O94832 | P05109 | Q14624 | P24821  | P02766 | P02749      | P00736 |
| Q15582 | P07339 | Q7KZF4 | Q16555 | P78527 | P42224 | P02763 | P06396 | P00736  | P08670 | P08697      | P29508 |
| Q5VTE0 | P07686 | P78527 | O75083 | Q86VP6 | P50454 | P0C0L5 | P01876 | P01011  | P08697 | P17936      | Q14624 |
| O75083 | P53621 | P20591 | P04179 | Q16555 | P04179 | P08670 | P02545 | P02787  | P02749 | P20742      | P19827 |
| P55072 | P06576 | P22314 | Q05682 | Q04446 | P07900 | P22692 | P02749 | P06396  | P18065 | Q5D862      | P01011 |
| P53621 | P13797 | P68871 | P50454 | P36871 | P27824 | P00734 | P02652 | P23142  | P01011 | Q9HCJ5      | P09871 |
| P13797 | Q5VTE0 | P21589 | P68871 | Q15582 | P27797 | Q92743 | P06702 | P09871  | P07477 | Q5VSP4      | P06702 |
| Q04828 | Q04828 | Q04446 | P21589 | O94832 | Q04828 | P01033 | P13646 | P00747  | P21810 | P59666      | Q08431 |
| Q7KZF4 | P36871 | P07686 | P27797 | Q6UVK1 | Q05682 | Q05682 | P43652 | Q06830  | Q14624 | P0C0L4      | P98066 |
| P78527 | Q86VP6 | P13674 | P26641 | P50395 | Q16851 | Q5VSP4 | P01033 | P01033  | P43652 | Q06828      | P01834 |
| P26641 | Q06830 | Q05682 | Q86VP6 | P43490 | Q9NZN4 | P10915 | P00747 | P02652  | P02652 | Q08431      | P12273 |
| P23284 | P12110 | P60842 | P30041 | Q04828 | O75083 | P36955 | P01011 | Q14498  | Q14393 | P04792      | P02538 |
| Q16555 | P60842 | O75369 | P07686 | O75369 | Q86VP6 | P20742 | Q96DA0 | P02765  | P06733 | Q02818      | P20742 |
| Q9NZN4 | P21980 | Q16851 | P36578 | P06744 | P69905 | Q92626 | P12110 | P02760  | P01871 | P02774      | Q5D862 |
| P63010 | P27797 | P13797 | P23284 | P30041 | Q86Y23 | P10809 | Q86Y23 | P05121  | P23142 | P43652      | Q9HCJ5 |
| P19338 | Q04446 | P50395 | Q7KZF4 | Q05682 | P06576 | Q5D862 | P08238 | P02652  | P02652 | P36957      | Q86Y23 |
| P02647 | Q7KZF4 | P23284 | Q06830 | P13797 | P30041 | P20774 | Q02753 | P59665  | P35241 | P0DOY3      | P53597 |
| P36871 | P19338 | P06576 | P50395 | P42224 | P06744 | P08697 | P05452 | P07339  | P00751 | P10909      | P31151 |
| P30041 | Q9NZN4 | Q8WUM4 | P13674 | Q06830 | Q16555 | P05155 | P00338 | P02749  | P02774 | P01042      | P0DOY3 |
| P07814 | P21589 | P06737 | Q6UVK1 | P36222 | P26641 | P01042 | P43652 | Q13822  | P02787 | P02766      | P00734 |
| P21589 | P40939 | P07814 | Q8WUM4 | P69905 | P08254 | Q8WWZ4 | P01834 | P00579  | P17936 | Q06828      | P00558 |
| P06576 | P35580 | Q15084 | P27824 | P19338 | Q6UVK1 | Q13162 | P35555 | P00738  | P36955 | P10915      | P0C0L5 |
| P04179 | P63010 | P36222 | P69905 | P23284 | P07686 | P54652 | P05543 | P54652  | P00558 | Q8IUH5      | P10909 |
| Q6UVK1 | P36578 | P40939 | P53618 | P26641 | P19338 | P53597 | Q9BQE3 | P11142  | P31025 | P43652      | P00738 |
| P06737 | P62258 | P19338 | P36871 | Q07954 | P63244 | P20908 | P08697 | P08697  | Q86Y23 | P02765      | P02774 |
| Q06830 | P04179 | P19367 | O00159 | P07686 | Q06830 | P12111 | Q5D862 | Q8WWWZ7 | P05109 | P02652      | P01042 |
| Q16658 | P10809 | P36578 | Q04828 | P13674 | P36222 | P10599 | P26038 | Q04695  | P10915 | P35555      | P05231 |
| P35527 | P13674 | P27824 | P06576 | P41252 | Q15084 | P0DOY3 | P17936 | P20742  | P02763 | Q08629      | P01037 |
| P36222 | P52272 | P36871 | P36222 | O00159 | P50991 | P04217 | P62805 | P36955  | P20742 | P0C0L5      | P12814 |
| P69905 | P63244 | P13667 | Q15084 | P06576 | Q16658 | P01037 | P50395 | Q8IUH5  | Q9UK55 | Q9BQE3      | P00751 |
| Q01518 | P30041 | Q16658 | Q16658 | P63010 | P50395 | O00391 | Q86Y23 | P20908  | Q5D862 | P01876      | P08670 |
| P35232 | P07093 | P26641 | P43490 | Q16658 | Q7KZF4 | Q8WWZ7 | P06576 | P17936  | P0DOY3 | Q86Y23      | Q8TF72 |
| P50395 | Q02878 | Q16555 | P50991 | Q8NBS9 | P60842 | P09871 | P20742 | P12273  | P01037 | P35241      | P10915 |
| P63244 | P50991 | P07195 | P06744 | P08254 | P40939 | P17936 | Q92616 | P0DOY3  | Q9Y3E1 | P01037      | P25705 |
| Q01995 | Q01518 | P06744 | P07195 | Q7KZF4 | P13674 | P02538 | P19827 | P0DOY2  | Q9H013 | P38646      | P17936 |
| P35908 | P07195 | P69905 | P37837 | P60842 | P23284 | P38646 | Q9Y6Q5 | B9A064  | Q13813 | Q96S21      | P43652 |
| Q86VP6 | P78371 | P10809 | P12109 | Q07960 | P12109 | Q96QA5 | Q9HCJ5 | Q9Y6R1  | P62805 | P00734      | Q08629 |
| P63104 | Q9UHD8 | Q6UVK1 | O94832 | P15144 | P53618 | P19827 | Q9BVA1 | Q9BY07  | P55265 | P04217      | P07477 |
| P13645 | P50990 | P53618 | Q9NZN4 | P27824 | Q07954 | P12273 | Q8IV35 | Q9P246  | P54652 | P06396      | P38646 |
| P60842 | P12109 | P38606 | P19338 | P36578 | P21589 | Q9HCJ5 | Q8IUH5 | Q9GZ28  | P53597 | Q96QA5      | P02652 |
| P14868 | P23396 | Q9NZN4 | P41252 | P63104 | P13797 | P59666 | Q08629 | Q96QA5  | P38646 | P13497      | P05109 |
| P60981 | P62937 | O00299 | Q8NBS9 | P21589 | P19367 | P48594 | P54652 | Q8N9K5  | P36957 | Q04695      | P54652 |
| P13674 | P07996 | Q06830 | P63244 | P02647 | P78371 | P01876 | P53634 | Q6ZRR7  | P12273 | O94925      | P01615 |
| Q15084 | P69905 | P30041 | P08254 | Q00341 | P23528 | P36957 | P53597 | Q5VSP4  | P01042 | P23142      | Q13425 |
| P07195 | Q6UVK1 | P61978 | P23528 | P14868 | P21980 | P51888 | P49841 | P31025  | P01019 | RRRRRQ14566 | P36957 |
| P22392 | P61978 | Q00341 | P04792 | Q05782 | P13645 | P10909 | P31151 | Q5D862  | O75145 | P61626      | Q08188 |
| P06744 | Q16658 | Q01518 | P35580 | P63244 | P06737 | P00738 | P30041 | Q13867  | P00736 | P07339      | P29401 |
| P78371 | P37837 | P78371 | P63104 | Q9Y678 | P12956 | P02766 | P20585 | P53597  | P06702 | P05231      | P23284 |
| P36578 | P13645 | P23381 | P78371 | P07814 | P18124 | A6NMY6 | P13797 | P31151  | Q8WWZ7 | RRRRRQ96Q89 | Q5VTE0 |
| P23528 | P50395 | P31939 | P12956 | P35232 | O75874 | O75223 | P12273 | P30273  | P19827 | RRRRRQ78504 | P23528 |
| P41250 | Q15084 | P00387 | P15144 | P22392 | P37837 | Q13867 | P10599 | P23280  | Q9HCJ5 | RRRRRQ8TBB1 | Q9BQE3 |
| P40939 | Q9Y678 | P63104 | Q16851 | P37837 | P61978 | Q14393 | P0DOY3 | P08670  | P53634 | RRRRRQ9Y3S1 | P02766 |

|        |        |        |        |        |        |        |             |        |             |        |        |
|--------|--------|--------|--------|--------|--------|--------|-------------|--------|-------------|--------|--------|
| Q13228 | O75874 | Q96QK1 | P62701 | P07195 | P14868 | P00338 | P04792      | P01834 | P29401      | Q8TED9 | Q9GZZ8 |
| Q07954 | O75083 | P35580 | Q07954 | P23528 | P07195 | P08779 | P01034      | P00558 | P29508      | Q9Y3E1 | P62987 |
| P37837 | P49327 | P22392 | P02751 | Q16851 | Q8WUM4 | Q13813 | RRRRRQ3B7T1 | O76061 | RRRRRQ6UXK2 |        | P19320 |
| P11413 | P31939 | P09601 | P13667 | Q96QK1 | P12110 | P02787 | P12110      | P38646 | P63104      |        | Q9Y3E1 |
| P49368 | P06744 | P12109 | Q96QK1 | P17655 | P11413 | Q9BQE3 | P0C0L5      | Q86YZ3 | P02538      |        |        |
| P52209 | P27824 | P43490 | P55786 | P07093 | P23396 | Q04760 | P18065      | Q12805 | P59666      |        |        |
| Q9UHD8 | P17987 | P50991 | P28838 | P78371 | P17987 | Q9UKT5 | P01615      | Q08188 | P62937      |        |        |
| O00299 | P07737 | P63010 | Q02878 | P50990 | P22392 | Q9BVA1 | P25705      | P39059 | Q14624      |        |        |
| P50991 | P19367 | Q07954 | P48444 | P53618 | Q01995 | P28300 | Q12805      | P01037 | Q00391      |        |        |
| P12109 | O94832 | P63244 | P11940 | O00299 | P41252 | Q14624 | P02766      | P01036 | P23284      |        |        |
| P48444 | Q07960 | P62701 | P40939 | P52209 | P02647 | Q9BTM1 | P63104      | Q13425 | P04083      |        |        |
| P61978 | Q9NZU5 | P32119 | P12236 | P04792 | P36578 | P04083 | P61769      | Q96DA0 | Q08380      |        |        |
| Q12884 | P22392 | P62937 | P61978 | P13667 | P38606 | P35241 | Q08188      | P10915 | Q13425      |        |        |
| P02768 | P40926 | P09914 | P12110 | Q92499 | P00387 | Q8N1N4 | P01037      | Q96S86 | Q93070      |        |        |
| P53618 | P35232 | Q75874 | P62424 | P12956 | Q06210 | Q8WZ42 | Q8N474      | P05231 | Q08188      |        |        |
| P05141 | P05141 | P04439 | P09601 | P40926 | Q94979 | Q76N11 | Q2M389      |        | Q9BTM1      |        |        |
| P09601 | P36222 | P18669 | P17987 | P06737 | Q96TA1 | P02649 | P36957      |        | P51888      |        |        |
| Q8NBS9 | O95782 | Q04828 | P18124 | Q15084 | O00299 | P20585 | P19013      |        | P48594      |        |        |
| P21980 | P62805 | P02647 | P27816 | P23396 | Q9UHB6 | P15924 | P59666      |        | P02649      |        |        |
| P50990 | Q13228 | Q8NBS9 | P60842 | Q9BSJ8 | P63010 | P06865 | P01619      |        | P15291      |        |        |
| P12956 | P02751 | P48444 | P54577 | Q6NZI2 | P05362 | P81605 | P02679      |        | Q9P246      |        |        |
| Q16851 | P04844 | P37837 | Q02461 | P09211 | P41250 | P19013 | P08779      |        | P06865      |        |        |
| P27824 | Q8WW11 | Q02878 | O00469 | P02768 | Q8NBS9 | P06733 | Q8TED9      |        | P10909      |        |        |
| P22626 | P09211 | P23528 | P07814 | P41250 | P43490 | Q9GZZ8 | RRRRRQ6UXK2 |        | P81605      |        |        |
| P54577 | Q99536 | P35232 | P63010 | P09601 | P46781 |        | Q71D13      |        | Q14409      |        |        |
| P55786 | P06737 | P09382 | P41250 | P48444 | Q92616 |        | P16112      |        | P20585      |        |        |
| P07093 | P23528 | P15144 | P02647 | Q06210 | P62701 |        | Q9BTM1      |        | Q86VP6      |        |        |
| P11940 | Q96QK1 | P50995 | P46781 | P12236 | P35606 |        | P55265      |        | RRRRRQ9Y2I7 |        |        |
| Q75874 | Q6NZI2 | Q13200 | P52209 | P21980 | P07737 |        | Q9P246      |        | RRRRRQ96Q89 |        |        |
| P30153 | Q16851 | P05141 | P50995 | O75874 | P13645 |        | P07339      |        | Q14168      |        |        |
| P07099 | P41250 | P54577 | P35228 | Q01995 | Q13200 |        | Q02774      |        | P31944      |        |        |
| P07996 | Q8NBS9 | P07093 | Q00341 | P50991 | P07093 |        | P07858      |        | Q6ZRR7      |        |        |
| P02511 | P07814 | P23396 | P22626 | P05362 | P62258 |        | RRRRRP78504 |        | RRRRRA5D8W1 |        |        |
| P27816 | P49368 | Q9UHD8 | P21796 | Q01518 | Q08211 |        | RRRRRQ8N0S6 |        | B9A064      |        |        |
| O60506 | P55786 | Q06210 | P61247 | P09525 | Q13228 |        | P16035      |        | P07686      |        |        |
| P62424 | P49591 | P17931 | P49368 | P61247 | P60981 |        | Q8TF72      |        |             |        |        |
| P49588 | P22234 | P41250 | O95782 | P18124 | P62937 |        | Q9Y240      |        |             |        |        |
| O95782 | P18124 | Q16678 | P35232 | P22626 | P50995 |        | P09382      |        |             |        |        |
| P04792 | P63104 | O94979 | O75874 | P15121 | P30086 |        | P14618      |        |             |        |        |
| P18669 | Q01995 | P50990 | P60981 | P49368 | P04792 |        | Q04695      |        |             |        |        |
| P38606 | P14868 | Q9UHB6 | P19320 | O00469 | P07814 |        | P10909      |        |             |        |        |
| P62701 | P41252 | P49591 | P07093 | P54577 | P23526 |        |             |        |             |        |        |
| Q96HC4 | P32119 | P07737 | O00299 | P38646 | P05388 |        |             |        |             |        |        |
| P00387 | P18669 | O60664 | P49591 | P13489 | P15121 |        |             |        |             |        |        |
| P40926 | P50995 | P78417 | P00387 | P35606 | P05141 |        |             |        |             |        |        |
| P23526 | P27816 | P61247 | Q9UHD8 | P18085 | P78417 |        |             |        |             |        |        |
| Q8WUM4 | Q92616 | P27105 | P05362 | P49591 | P22626 |        |             |        |             |        |        |
| P19367 | Q8WUM4 | P21796 | P07737 | P18669 | Q9Y678 |        |             |        |             |        |        |
| O60664 | P62424 | P35228 | P21980 | P35580 | Q02878 |        |             |        |             |        |        |
| P09382 | P38606 | P62424 | P06737 | P05388 | P15144 |        |             |        |             |        |        |
| Q6NZI2 | P21796 | Q12884 | P11413 | P12109 | P62805 |        |             |        |             |        |        |
| P16403 | P08865 | P08865 | P31939 | P61978 | P53396 |        |             |        |             |        |        |
| Q99497 | P53618 | P16152 | P23381 | P30086 | Q13162 |        |             |        |             |        |        |
| P62937 | Q08211 | P12110 | P14868 | O95340 | P62424 |        |             |        |             |        |        |
| Q07960 | P27348 | P62258 | P23396 | P38606 | Q9UHD8 |        |             |        |             |        |        |
| P49591 | P15144 | P13645 | P15880 | Q8WUM4 | O00469 |        |             |        |             |        |        |
| P23396 | P30086 | P28838 | P32119 | P46977 | P52209 |        |             |        |             |        |        |
| Q02878 | Q9Y4L1 | Q9BSJ8 | Q9ULV4 | P62258 | P32119 |        |             |        |             |        |        |
| P30086 | O60506 | P49368 | P78417 | P55786 | P18669 |        |             |        |             |        |        |
| Q96QK1 | Q00341 | P27487 | P17655 | P19367 | P09601 |        |             |        |             |        |        |

|        |        |        |        |        |        |
|--------|--------|--------|--------|--------|--------|
| P17931 | P02511 | P40227 | Q9Y6N5 | P78417 | P55786 |
| P15144 | P12956 | Q92499 | P08865 | P40939 | P49368 |
| P09211 | P09382 | P41252 | P19367 | P62937 | P35580 |
| P15559 | P37802 | P04899 | P62258 | P15559 | Q96HC4 |
| Q9Y678 | P05388 | P04792 | P62805 | Q01813 | P09211 |
| P61247 | P17931 | P07099 | P38606 | P39023 | Q43175 |
| P32119 | Q14152 | P60981 | Q07960 | P49748 | Q13642 |
| Q14108 | P60981 | P02792 | Q9BSJ8 | P17987 | O60664 |
| P38646 | P13489 | P14868 | P49327 | P00387 | Q92499 |
| P50995 | P54577 | Q92616 | P09525 | P32119 | P13010 |
| P18124 | Q99497 | Q01995 | P09211 | P26640 | P07099 |
| Q9BSJ8 | P00387 | P09211 | Q99623 | P62701 | P23246 |
| P78417 | Q07954 | O75396 | P18669 | P07384 | P48444 |
| P09525 | O60664 | P55786 | P02511 | Q13200 | P09382 |
| P13667 | P02452 | P48735 | P23526 | P08865 | Q96QK1 |
| P07858 | P48735 | P17987 | O60664 | Q13642 | P50990 |
| Q99536 | O00299 | P23246 | P22392 | P23526 | Q99623 |
| P04844 | Q15075 | Q95782 | Q92499 | P09382 | P13667 |
| Q99832 | Q14108 | Q9ULV4 | P05388 | P07737 | Q6NZI2 |
| P21796 | P22626 | P46781 | Q9NZU5 | P17931 | P54577 |
| P62258 | P00568 | Q00839 | P55084 | Q9Y4L1 | P16402 |
| P41252 | P02647 | P02751 | P18085 | Q99536 | Q14108 |
| Q13162 | O15143 | Q13162 | P16402 | O95782 | Q07960 |
| P06865 | Q07020 | P11940 | Q9Y678 | Q99497 | P31939 |
| P55084 | P35606 | P08254 | Q9Y696 | O60506 | P18085 |
| P31939 | P78417 | P18124 | P23246 | P21796 | P39023 |
| P17858 | Q13642 | Q07960 | Q13228 | P11413 | P38646 |
| P62826 | Q14974 | Q99536 | P07384 | P60981 | P06756 |
| P18085 | P11413 | Q99623 | Q14974 | Q02878 | P17931 |
| P13010 | P15880 | Q6NZI2 | Q99536 | P02751 | P62249 |
| P40121 | P00367 | P00568 | P62937 | Q14108 | P17655 |
| P16278 | Q06210 | P19320 | Q13642 | P12110 | P40227 |
| P61604 | P23526 | P49748 | Q01995 | P30153 | P27816 |
| P62195 | P17858 | P62805 | Q9BS26 | P04844 | P12268 |
| P17655 | Q9Y6C2 | Q9Y617 | P17931 | O60664 | P00966 |
| O43854 | Q15436 | Q15075 | Q96HC4 | P05023 | Q99497 |
| P29692 | Q99460 | Q07020 | Q01518 | P60900 | P49327 |
| Q9UHG3 | P07858 | P12956 | P30086 | P62277 | P63104 |
| P15880 | Q96TA1 | Q9Y6C2 | P35527 | P27816 | Q8WWI1 |
| P26599 | Q04637 | Q9Y678 | Q96AY3 | P22234 | Q9BTV4 |
| O00469 | Q16181 | P26640 | P52272 | P02792 | P07996 |
| Q8WWI1 | P62241 | Q14152 | P40121 | Q15365 | Q9BSJ8 |
| O43776 | P51659 | P52209 | Q14108 | P00966 | P16278 |
| P45880 | P04792 | Q16181 | P00568 | P05556 | P19320 |
| P35237 | P16402 | Q16401 | P40926 | Q9Y696 | P26599 |
| P46781 | Q13162 | O15460 | P50990 | P62424 | P49591 |
| P35606 | P40429 | Q08211 | O00571 | P46781 | Q14152 |
| P04062 | Q00325 | P37802 | P49748 | P37802 | P63000 |
| P23246 | P43490 | O60506 | Q92743 | P27105 | P02511 |
| Q99623 | Q14247 | P17655 | Q13162 | O00571 | Q00341 |
| P05023 | O00469 | Q14974 | P38646 | P16152 | P11940 |
| O00231 | Q00571 | Q7L576 | P07099 | Q15907 | P62820 |
| Q9NVA2 | P48444 | P40429 | Q86UP2 | P23381 | Q14974 |
| P16152 | P26599 | P22234 | P05023 | P10253 | P46977 |
| O94979 | P23246 | P62277 | P00966 | P62805 | P48735 |
| P07737 | P02792 | Q01813 | Q01813 | Q16401 | P40121 |
| Q13838 | Q9UHG3 | P38646 | P05556 | Q13228 | P62826 |
| Q13642 | P40261 | O00571 | P48735 | Q9UHG3 | Q9ULV4 |
| Q00341 | P27105 | P09525 | P13645 | P31939 | Q99536 |
| P13489 | P53396 | P02511 | P62249 | P59998 | P40261 |

|        |        |        |        |        |        |
|--------|--------|--------|--------|--------|--------|
| Q15907 | P18085 | P35606 | P15559 | P04899 | P21796 |
| P53396 | P38646 | P39656 | Q6NZI2 | P55060 | P09525 |
| O15143 | P07099 | P52272 | P09382 | P16278 | P51149 |
| O95336 | P09601 | P19971 | P26599 | P40261 | Q15075 |
| P62805 | Q16401 | P07858 | O75396 | P23246 | P09429 |
| P62277 | Q9Y617 | Q15907 | Q99497 | P26639 | P26373 |
| P51659 | Q12884 | Q96HC4 | P02794 | P34897 | P60900 |
| P34897 | P06865 | P40261 | Q9NQC3 | Q9UHB6 | Q9Y4L1 |
| P52272 | P46781 | Q92841 | P16152 | Q9NQC3 | P26640 |
| Q13200 | P62701 | P40926 | O00231 | P02511 | P62241 |
| P49748 | P17655 | Q99497 | Q14247 | P62820 | P35232 |
| O43491 | P60953 | Q9Y262 | Q14152 | Q13838 | Q9UHG3 |
| P31943 | Q969G5 | P54136 | Q15008 | P55084 | P20073 |
| P37802 | P09525 | P34932 | P07858 | Q99832 | O43776 |
| O43175 | P61026 | O43795 | P30153 | P20591 | P00568 |
| P14550 | Q9NQC3 | Q9NQC3 | O60506 | P06865 | P15559 |
| Q06210 | P52209 | O43776 | P53396 | O43776 | P62987 |
| P00568 | Q92743 | P15559 | P40227 | P08134 | P61247 |
| O43795 | P62277 | P18085 | P20073 | P54136 | P16152 |
| Q9UHB6 | P35237 | P49327 | P09914 | P60953 | P37802 |
| Q16401 | Q9ULV4 | P11413 | P62820 | P11940 | P39019 |
| P63000 | P39023 | P21980 | Q13200 | P07996 | Q92743 |
| Q92499 | P62879 | Q9Y6N5 | P06865 | O43175 | P07858 |
| P62241 | P40925 | Q96TA1 | Q9Y4L1 | P26373 | Q01518 |
| P49327 | P61247 | P61026 | P62191 | Q99623 | P35527 |
| Q9NQC3 | P10253 | P39023 | P62987 | P52272 | Q99460 |
| P40261 | P60900 | Q13642 | P29692 | P13010 | Q07020 |
| P27105 | P29692 | P16403 | P08134 | Q99460 | P34932 |
| O00571 | P31948 | Q03135 | Q32P28 | P52565 | P40926 |
| Q08211 | P30153 | P11766 | P54886 | P19320 | P62873 |
| P62820 | Q9Y6N5 | P05556 | P40429 | P62249 | Q96AY3 |
| P48735 | P45880 | P30153 | P60953 | P50995 | P02751 |
| P30740 | Q13200 | P13489 | Q16678 | Q96TA1 | P08134 |
| P04899 | O14773 | P30086 | P62826 | P17858 | O43491 |
| Q92743 | O43776 | Q14108 | O60763 | P09429 | Q15436 |
| Q96KP4 | P11766 | P05388 | Q96KP4 | Q08257 | Q03135 |
| P10768 | O95336 | P27816 | P04899 | P51149 | P62277 |
| P54136 | P16152 | P62826 | O43491 | P00367 | P17844 |
| P39656 | O43175 | Q15365 | Q12884 | P07858 | O14980 |
| P52565 | P49588 | P04844 | Q92841 | O75396 | P55084 |
| Q14152 | Q99623 | P49411 | O95336 | P49588 | P27105 |
| Q7L576 | Q14195 | P16278 | Q06210 | O95336 | P10768 |
| P12110 | O00231 | P62195 | P26373 | Q07020 | Q95340 |
| P21399 | P62851 | P22626 | P61604 | P00568 | Q14103 |
| P62917 | P30048 | Q08431 | Q15365 | Q14152 | P04844 |
| P51149 | Q92499 | Q13228 | O43795 | Q12884 | P49588 |
| O75396 | Q9BSJ8 | P05023 | P07996 | Q92743 | P55060 |
| Q16678 | P06756 | P62987 | P62241 | P48735 | Q9NVA2 |
| P00367 | Q03252 | P04062 | Q14103 | Q14103 | P17858 |
| Q15365 | Q96HC4 | P60953 | P59998 | Q16181 | P01023 |
| O15173 | P35908 | P30740 | P45880 | Q9H4M9 | Q02218 |
| Q96AY3 | P05023 | P26373 | P02792 | O60547 | P30050 |
| P62873 | P30050 | O43491 | Q92616 | P11279 | P05556 |
| Q96TA1 | P51149 | P00966 | P46777 | P16070 | O60763 |
| P07384 | Q99832 | P02794 | Q9BTM1 | P40121 | P02768 |
| O60547 | P15121 | P23526 | P54136 | Q13162 | O00571 |
| P35580 | P40121 | O15144 | Q14195 | Q9Y6C2 | Q14195 |
| P21266 | P08134 | Q13838 | P62269 | P62826 | P49748 |
| P09429 | P62249 | Q14103 | P09651 | P26599 | P05023 |
| Q9Y696 | P05556 | P29692 | P17858 | P07099 | P16070 |

|        |        |        |        |        |        |
|--------|--------|--------|--------|--------|--------|
| P62987 | Q96KP4 | P62280 | P60900 | P40227 | P02792 |
| P00966 | O00203 | P45880 | Q9NVA2 | P62834 | P15880 |
| Q96CW1 | Q15365 | Q9Y4L1 | P25786 | Q9H4A4 | P13489 |
| P30044 | Q13557 | P60900 | P40925 | O60488 | O14773 |
| Q07020 | P26640 | Q92743 | P13489 | P02786 | Q15365 |
| P43490 | P26373 | P02461 | P62277 | O43491 | Q08431 |
| Q32P28 | Q71D13 | O15143 | Q08431 | P61254 | P50914 |
| O14773 | P16070 | O43175 | P09429 | Q92841 | P04899 |
| P02792 | Q15907 | O00469 | P39019 | Q9UHD8 | P59998 |
| O14818 | P49411 | O14773 | P35606 | P34932 | P30044 |
| P08865 | P62906 | P62851 | O95340 | P27348 | P06865 |
| O43242 | P31943 | Q43854 | Q9NVJ2 | P15880 | P00505 |
| P40925 | P48047 | Q15436 | P04062 | P39019 | P54136 |
| P46459 | P15559 | Q00325 | P30050 | Q03135 | P11766 |
| P39023 | Q16678 | P07996 | P51659 | P62241 | P61619 |
| Q15075 | P62987 | P62873 | O94979 | Q96AY3 | Q03252 |
| P06756 | P35527 | Q86UP2 | O14980 | P49327 | P31943 |
| P09960 | Q9NVA2 | P12268 | Q9Y617 | P02452 | P39656 |
| P60900 | P55084 | P15121 | P02452 | Q96HC4 | Q9NQC3 |
| P22234 | P00505 | P40121 | Q07020 | Q16531 | Q9Y696 |
| P17987 | P11940 | P61158 | P21266 | P40429 | O15143 |
| P26639 | P30044 | O00231 | Q9Y6C2 | Q08211 | Q9P2J5 |
| P04216 | Q99879 | O14879 | O15143 | O75131 | P27487 |
| P00505 | P61604 | Q99832 | P04844 | Q9ULV4 | O43242 |
| Q9Y265 | P13667 | Q14247 | Q08211 | O00231 | Q99880 |
| P27348 | P59998 | P35998 | Q15075 | O43854 | P28482 |
| P09651 | P60660 | P10768 | P51884 | Q9UL46 | P62269 |
| P62906 | Q13838 | P27361 | P35237 | P35527 | P04216 |
| P02042 | Q9Y696 | P06756 | P61313 | P04216 | Q9Y6N5 |
| P21291 | Q15019 | P62834 | O14773 | P30044 | P49411 |
| Q16531 | O60763 | P26599 | P22234 | P27487 | Q99832 |
| P62081 | P31946 | P62244 | P34897 | O15460 | Q9H4A4 |
| Q7L1Q6 | O75396 | Q14203 | P15121 | Q9BTM1 | P40925 |
| Q08431 | P54136 | P40925 | P26640 | P46783 | P48643 |
| P05388 | P33176 | P49189 | P26639 | O94979 | O60506 |
| P22413 | Q9P0L0 | O60763 | P12268 | P23634 | P49189 |
| Q9Y6N5 | Q14103 | O00203 | Q15019 | P31943 | P40429 |
| Q9UJ70 | Q00839 | P61254 | Q02543 | P02794 | P11279 |
| P54802 | Q9BTV4 | P09429 | P50914 | P11766 | P02794 |
| P02461 | P61981 | Q32P28 | P46977 | P63000 | P52272 |
| Q00839 | P62826 | P48047 | P62081 | Q9UNM6 | Q08257 |
| Q9ULV4 | P01023 | Q99439 | P16070 | Q06323 | Q14247 |
| P39019 | Q9UHB6 | P62241 | P51149 | Q9BS26 | Q15907 |
| P01023 | Q9UJ70 | Q15008 | P11766 | P52907 | Q12884 |
| P11279 | P21291 | Q14195 | Q9UHB6 | P61158 | P21291 |
| P84243 | P49748 | Q8IWE2 | P62280 | P49189 | P07384 |
| Q9Y4L1 | P50914 | Q99798 | P13010 | P62191 | P09651 |
| Q15008 | P02768 | P63000 | P39656 | P31949 | Q06323 |
| P42765 | Q94905 | P55084 | P37802 | O14818 | O00231 |
| Q99439 | P47756 | P18621 | P46783 | Q13510 | Q9BTM1 |
| Q96DA0 | P21281 | P49755 | Q9NYU2 | P53396 | Q16678 |
| P50914 | P13010 | Q8N8S7 | P16278 | P62140 | O43399 |
| Q9BTV4 | O60547 | O75390 | Q13724 | P16402 | P02452 |
| P26373 | Q03135 | P08134 | P62879 | P04632 | P61313 |
| P26640 | P09651 | Q9NVA2 | Q7L1Q6 | P15586 | P46459 |
| Q00325 | Q08431 | P05362 | Q9H4A4 | O15144 | Q13510 |
| P10253 | P00966 | P04216 | Q8WWI1 | Q14847 | P30153 |
| P61158 | Q32P28 | Q9NZU5 | O75390 | Q00325 | P28074 |
| O14980 | Q08257 | P62269 | Q53GQ0 | O14980 | Q9NVJ2 |
| P19623 | P04062 | P51659 | P46782 | Q14247 | P07910 |

|        |        |        |        |        |        |
|--------|--------|--------|--------|--------|--------|
| Q96AC1 | Q9BS26 | P20073 | P52907 | Q96G03 | O75396 |
| P18621 | Q96AG4 | Q9Y696 | Q9H4M9 | P21964 | P14550 |
| Q16181 | Q13510 | P51571 | O00410 | Q96HE7 | P19623 |
| Q16891 | Q01813 | P05161 | P60660 | Q7L576 | P35908 |
| Q92841 | Q06323 | P31943 | P62851 | P62987 | P31949 |
| Q13885 | P30740 | P35527 | P04216 | P49755 | Q9NZU5 |
| P48047 | P04899 | P15880 | P30044 | P10768 | Q00839 |
| P61254 | P52565 | P62249 | P19971 | P35237 | P11586 |
| Q9Y6C2 | O15427 | P06865 | Q15436 | Q15436 | P27348 |
| P40227 | O75131 | P59998 | O43776 | P01023 | P10253 |
| Q01813 | P11279 | Q9UQ80 | Q04637 | Q32P28 | P62195 |
| P51991 | O00410 | P51648 | P62834 | Q9NSD9 | Q9BUT1 |
| P05556 | P23634 | P25789 | P30740 | Q08431 | Q16891 |
| O15460 | P30040 | P62140 | Q96CW1 | P61604 | P52565 |
| P08134 | P48643 | P17858 | P62136 | Q92542 | P05455 |
| Q13557 | P18621 | P31949 | P40261 | Q00839 | O43854 |
| Q14247 | P49755 | P61981 | P05455 | P62873 | O75390 |
| P11766 | P06748 | O43242 | O95302 | P27695 | O15118 |
| P02452 | P28074 | P62917 | Q13557 | O14773 | P08865 |
| Q9Y646 | Q9UHL4 | Q96KP4 | P00505 | Q9Y6N5 | P61224 |
| P40429 | Q15417 | P07384 | P62195 | Q9UJ70 | Q01813 |
| P27361 | P46777 | P51149 | Q9BTV4 | Q9BUT5 | Q13838 |
| Q15436 | Q9BUT1 | P46977 | P09960 | P06756 | Q9NYU2 |
| P10599 | O43854 | P00367 | Q16881 | P49589 | P62851 |
| O60493 | P22102 | P52907 | Q16778 | P29692 | Q71DI3 |
| P02751 | Q16531 | P46459 | P35908 | O43795 | P62917 |
| P51148 | P63000 | P16070 | Q96TA1 | P18621 | Q9UL46 |
| P52907 | O43795 | P62191 | P02786 | P20073 | P30048 |
| Q13510 | P51148 | Q9UJ70 | P54652 | P15848 | P02786 |
| Q9UQ80 | P63241 | P54886 | Q99832 | P21266 | P45974 |
| O00410 | P16278 | P25788 | P52565 | P09960 | Q99439 |
| P62140 | P09960 | P61604 | Q13510 | P46782 | P35237 |
| P02794 | O43242 | P48643 | Q16401 | P16112 | Q7L1Q6 |
| P20073 | Q96AC1 | Q969G5 | Q9UHG3 | Q13557 | Q96KP4 |
| Q14240 | P02461 | P21266 | Q03252 | P48047 | P61088 |
| P62834 | P25398 | P49588 | Q92973 | P19971 | P31153 |
| Q9NSD9 | P62917 | P10599 | P48047 | Q12905 | O15144 |
| Q6YHK3 | Q9NSD9 | P53396 | Q03169 | P55209 | Q02978 |
| Q14103 | P04216 | Q9BTV4 | P21964 | P00505 | Q96CW1 |
| Q15019 | Q15366 | P35908 | P30048 | P25398 | Q9Y262 |
| P30040 | P27695 | P61619 | P39023 | P39656 | P52907 |
| P16401 | Q12765 | P21281 | O95373 | P46459 | P22413 |
| P46777 | Q9Y2A7 | Q9H4A4 | Q02218 | P48643 | Q9UJ70 |
| Q53GQ0 | Q86UP2 | P10253 | P08123 | P22102 | P21281 |
| P17405 | P11717 | O95336 | Q96AG4 | Q02218 | P62081 |
| P62851 | Q93077 | P61019 | P00367 | P19623 | Q15008 |
| Q9P2J5 | P62140 | P21291 | Q15907 | P58876 | P21964 |
| Q9NR31 | P31949 | P26639 | Q8IWE2 | P30050 | P42785 |
| P18084 | P23381 | P50914 | P55060 | Q04637 | O15427 |
| P54886 | P34897 | Q13510 | P06756 | P04062 | P49257 |
| O94925 | P30084 | Q71DI3 | P62906 | Q15019 | P25789 |
| Q15181 | O75915 | Q07866 | Q9UL46 | P11586 | P28838 |
| P61019 | P46926 | P04632 | Q00839 | P45880 | P34897 |
| P30050 | Q13724 | P51688 | Q14847 | P61019 | P07741 |
| P04080 | Q7L1Q6 | Q92542 | O43175 | P06748 | P49207 |
| Q9BUT1 | P07910 | Q14019 | Q16891 | P05455 | O60488 |
| P30085 | O14494 | P62906 | O15173 | P02042 | P35998 |
| Q9NVJ2 | P09429 | Q06323 | P31949 | Q71DI3 | P02042 |
| P62249 | Q99613 | P07910 | P01023 | P45974 | Q8IWE2 |
| Q9UL46 | O43399 | P13473 | Q92542 | Q14974 | P62280 |

|        |        |        |        |        |        |
|--------|--------|--------|--------|--------|--------|
| P30048 | P02042 | Q9BUF5 | P49189 | Q02543 | P26639 |
| P49189 | Q9Y646 | P39019 | P51665 | P51665 | P30040 |
| P02786 | P62753 | P05198 | P25398 | P04080 | P61026 |
| P13473 | O14880 | P34897 | P10768 | P62917 | P62244 |
| P55060 | Q6DD88 | P55209 | Q12906 | Q16222 | P62906 |
| Q9H4A4 | P40227 | Q8NHP8 | P49755 | P62244 | P23381 |
| Q02218 | P17844 | P62333 | P22102 | P30048 | Q96AC1 |
| Q15631 | Q9UNM6 | P10644 | P31943 | O43399 | P61604 |
| Q5JXB2 | Q7L576 | Q03169 | O94925 | P61981 | Q9UL25 |
| Q6DD88 | P54802 | Q99460 | P14555 | Q16678 | P51659 |
| Q9H4G0 | P98082 | O94925 | Q99460 | Q13724 | Q12905 |
| P27695 | P04080 | P02768 | Q71DI3 | Q9Y617 | P54802 |
| P46977 | O94925 | P00505 | P27348 | P84077 | P51148 |
| P62244 | P39019 | P22102 | P49207 | O43242 | P10619 |
| P16070 | P61353 | P30048 | P07910 | P51991 | Q7L576 |
| Q02543 | P04632 | P01023 | P43304 | Q969G5 | Q00325 |
| P53004 | P61158 | O60547 | P25788 | P02461 | P04632 |
| Q03135 | Q9H4A4 | P09651 | P62917 | P21291 | P00367 |
| Q12905 | P21399 | Q92973 | P28482 | P61026 | P46777 |
| P31949 | Q8IWE2 | O75131 | P33176 | Q86UP2 | P61158 |
| O14880 | Q14847 | Q9UHG3 | Q13045 | P40925 | P55209 |
| P25788 | P16401 | P30050 | P27105 | P61313 | P31946 |
| Q9Y617 | P22413 | P35237 | P11279 | P07741 | P60953 |
| P11717 | Q07866 | P60660 | P13473 | P61353 | O75131 |
| Q99460 | P21266 | Q9P2J5 | P42785 | Q9NYU2 | P46783 |
| Q16778 | P62269 | P43034 | P63000 | Q9P2J5 | Q15366 |
| P35998 | P07585 | O15427 | Q16181 | P50914 | P29692 |
| P62333 | P02765 | P13010 | Q9UJ70 | O15143 | P22102 |
| Q8NHP8 | P19105 | Q99880 | Q9BUF5 | P22413 | Q92900 |
| Q969X5 | P10644 | P61353 | Q96AE4 | Q76M96 | Q12906 |
| Q15366 | Q00688 | P04080 | P61019 | O60763 | P08582 |
| P42785 | P07384 | P51148 | F53004 | O75390 | P51884 |
| Q9BTM1 | O15144 | P53992 | P99999 | O14494 | P28066 |
| P60660 | P46779 | Q96AY3 | P18621 | P51884 | P46782 |
| P06748 | P61619 | Q9Y646 | P02042 | Q96IU4 | O43795 |
| Q9UHL4 | P48509 | O15145 | Q15043 | P14550 | Q08209 |
| P05198 | P46977 | Q9UBR2 | P98082 | P30740 | Q8IZP2 |
| Q9UKX5 | Q9Y262 | P30044 | Q12907 | P51648 | P48047 |
| Q8IWE2 | P18084 | P02042 | P62913 | P62269 | P02461 |
| Q9Y5X1 | P14550 | Q9NRV9 | Q99439 | P05198 | P61160 |
| P31153 | P49189 | P46783 | O43854 | Q96KP4 | P22234 |
| O15144 | P51178 | P52565 | Q14019 | Q13423 | Q13620 |
| Q00688 | P35998 | P05455 | O60547 | Q9Y265 | P05198 |
| P10619 | O94979 | P51178 | O43852 | P51659 | P68366 |
| P49755 | P62888 | P31153 | Q00325 | P62750 | P50570 |
| Q95816 | P02794 | P47897 | O15460 | P62851 | P04080 |
| Q9NRV9 | P31153 | Q8IZP2 | P11586 | P35908 | P42704 |
| Q92973 | P25788 | P62081 | P27695 | Q5JXB2 | P61254 |
| Q96AE4 | P38117 | P23634 | Q16222 | Q9UHL4 | P78344 |
| P15121 | O95302 | P25398 | P02768 | Q9BTV4 | Q9HDC9 |
| Q16222 | P51888 | P54920 | O43242 | Q99439 | Q96IU4 |
| Q969G5 | P25789 | O15260 | Q14203 | Q9BUT1 | Q10471 |
| P59998 | P39656 | P28074 | Q9HD45 | P02765 | Q14847 |
| P49411 | P10768 | A0FGR8 | P46459 | Q7L1Q6 | P22694 |
| P09622 | P61254 | Q14240 | O14818 | Q92597 | P16401 |
| P08582 | Q10471 | Q15366 | Q06323 | P33947 | P19105 |
| P48643 | Q15008 | Q5JXB2 | O94855 | Q14203 | Q16401 |
| Q9Y262 | P62834 | O14818 | P19623 | P49411 | Q9Y617 |
| Q14019 | P61160 | Q12906 | P04080 | Q16891 | O00410 |
| O60763 | Q9UIQ6 | P55060 | Q96AC1 | Q9NVA2 | P51571 |



|        |        |        |        |        |        |
|--------|--------|--------|--------|--------|--------|
| Q96G03 | P27361 | P21964 | Q96HE7 | Q92616 | P06748 |
| P38117 | Q9Y265 | Q96CW1 | P49411 | P30040 | Q9BS26 |
| Q9NYU2 | P11586 | P60866 | O00203 | Q92973 | Q14554 |
| P51178 | P62244 | P51884 | P06753 | P12268 | Q15233 |
| P25398 | Q96CW1 | P06748 | Q03135 | Q14019 | Q96HE7 |
| P24539 | O14818 | Q12905 | Q10471 | P54802 | P43304 |
| Q9HDC9 | O15173 | P47756 | P28066 | Q00688 | O95336 |
| O15118 | Q12906 | P16930 | P45974 | Q12797 | P30740 |
| P46783 | P27708 | Q96AG4 | P25787 | Q15631 | Q16181 |
| Q8WX93 | P28838 | Q92945 | P25789 | P42785 | Q15631 |
| O60749 | Q14203 | P11279 | Q00688 | O75915 | P01876 |
| P78344 | P36957 | Q7L1Q6 | P61088 | P61619 | Q9NR45 |
| Q14195 | P41091 | Q9BUT1 | O14879 | P53004 | P48163 |
| Q9UNM6 | Q14914 | Q08257 | Q9BUT1 | P32969 | P27708 |
| O94905 | Q8NHP8 | P17844 | P42704 | Q15181 | Q15019 |
| Q14974 | Q16891 | Q03252 | P27487 | P30085 | O94905 |
| P34932 | Q76M96 | P33176 | O14494 | P49257 | Q04637 |
| P19971 | Q12905 | P16401 | P36957 | P48507 | Q13557 |
| P60953 | O95340 | O15118 | P21291 | P47897 | P25398 |
| Q8WXF1 | Q9BVK6 | P09960 | P26022 | Q99613 | O94855 |
| P12268 | P52907 | P19623 | P30040 | P04181 | O14818 |
| Q14847 | P99999 | O94905 | P10301 | P11166 | P60660 |
| Q02978 | Q96G03 | P21399 | P34932 | O00410 | P14555 |
| P51884 | P02786 | Q9UIQ6 | P08648 | Q8NHP8 | O14880 |
| P63241 | P62191 | P99999 | P61254 | P62906 | Q13724 |
| P28838 | P46783 | O43399 | Q92597 | P51148 | Q9BUF5 |
| P47756 | P13473 | P60891 | P62266 | P46777 | P50453 |
| P42704 | O75367 | Q96AC1 | Q9Y265 | P98082 | Q16531 |
| Q07955 | Q9UHQ9 | Q16881 | P21281 | Q9UHQ9 | Q92542 |
| P08962 | O43491 | P19105 | P49588 | P08195 | Q76M96 |
| Q9UBR2 | P43304 | Q13557 | Q969G5 | P13473 | P46779 |
| Q15417 | P60903 | Q10471 | Q9NSD9 | P62081 | P99999 |
| O00203 | O00232 | P63241 | P10644 | O75718 | P53004 |
| Q9BS26 | Q9UL25 | P42785 | P62888 | Q14195 | P21266 |
| P61981 | Q9NVJ2 | O60784 | P61353 | O94925 | Q9UHL4 |
| P50453 | P27487 | P41091 | P54802 | Q53GQ0 | P62888 |
| Q86UP2 | P68402 | P43243 | Q02978 | O43852 | Q02543 |
| Q5SSJ5 | P35637 | Q15417 | Q8WX93 | P78344 | Q99873 |
| P61163 | P54886 | O75718 | P16401 | P25788 | P62753 |
| P07585 | O15145 | Q9UL46 | O43399 | P60866 | P18621 |
| P51665 | Q8WUJ3 | Q02543 | Q9Y285 | P45877 | P48507 |
| P62913 | Q9UQ80 | P08962 | Q9UNM6 | Q9NRV9 | P42766 |
| O95340 | P36542 | Q9BTM1 | P78344 | Q6DD88 | Q9Y6C9 |
| Q92542 | P42704 | Q92597 | P10253 | Q13620 | P63241 |
| Q9H4M9 | P61313 | O95373 | P60228 | P62913 | Q9NSD9 |
| P46782 | P28066 | P62888 | P62753 | O94905 | P09960 |
| P11586 | P38159 | Q99829 | O95394 | Q9Y646 | P60866 |
| Q13131 | O75390 | Q96AE4 | P04004 | P99999 | Q96IJ6 |
| Q9Y224 | P46782 | O15173 | P16615 | P47756 | Q15046 |
| P62269 | Q96IU4 | P62753 | P43307 | P10619 | P10599 |
| Q12906 | Q9UBR2 | Q13045 | P51148 | P54886 | Q969G5 |
| P16615 | O14617 | Q43852 | P40763 | O15118 | P60903 |
| P62753 | Q9BUF5 | P02786 | P61619 | Q03252 | P13473 |
| Q16881 | P47897 | P55263 | P30085 | P63173 | O94925 |
| P21281 | P45877 | Q95340 | Q13838 | P51572 | P04181 |
| P48163 | P61163 | P61313 | P01011 | P68402 | P10644 |
| Q9UHB9 | Q99829 | O60749 | O00232 | Q96L21 | Q00688 |
| P16112 | Q92542 | O00410 | Q9UL25 | P13804 | Q9Y230 |
| P60228 | P21964 | Q9Y265 | P06730 | Q8WWI1 | Q9UBR2 |
| O95831 | P62081 | Q04637 | P31946 | P28838 | O43852 |

|         |        |        |        |        |         |
|---------|--------|--------|--------|--------|---------|
| P62888  | P78344 | P10155 | P84103 | P12277 | Q96AE4  |
| Q9Y2A7  | Q969H8 | P17174 | P31153 | Q15008 | P01008  |
| Q92597  | Q9Y285 | P31946 | P32455 | Q99798 | Q9H4M9  |
| P13647  | Q96AE4 | P46777 | P05198 | P14174 | P12955  |
| P12955  | P10599 | Q13885 | Q9P2J5 | P25787 | P02765  |
| Q8NB,JS | Q99439 | P28066 | P16112 | Q99873 | Q96AG4  |
| P42766  | P56134 | P53004 | Q12905 | O00303 | P54652  |
| O14494  | P30046 | P46926 | P10155 | Q99829 | P62140  |
| P61313  | P14555 | P49257 | P12955 | Q15758 | Q8WX93  |
| Q96AG4  | P14174 | P48147 | O60749 | Q02978 | Q14192  |
| O75915  | P62913 | Q9HC38 | Q8IZP2 | P08962 | P32969  |
| P60866  | P13804 | Q15046 | P62333 | P09651 | P06753  |
| Q9NZU5  | Q9Y6E0 | P42766 | Q96IU4 | Q14956 | O60547  |
| P49773  | Q9HDC9 | Q9BS26 | P04632 | P35241 | P18084  |
| Q99798  | P31327 | P02452 | Q00765 | P54819 | Q94874  |
| Q8IZP2  | O95816 | Q16891 | Q15366 | P52895 | P45880  |
| P02765  | O95865 | Q14258 | P51688 | P53634 | O75629  |
| Q6EMK4  | Q92597 | P12955 | P50570 | P54687 | Q02952  |
| P43304  | P43034 | P15311 | P55884 | O14880 | P62263  |
| Q9UJKK3 | Q96AY3 | P60903 | Q13620 | P33176 | P31937  |
| P48507  | P51648 | Q96IU4 | Q13885 | Q9BVC6 | P14174  |
| Q08722  | Q9P2J5 | Q8WW1  | P07741 | Q9Y224 | P51648  |
| P28074  | Q13404 | P62910 | P63241 | Q15746 | P36542  |
| P05413  | Q92945 | P48509 | Q15631 | Q92688 | Q99829  |
| P68402  | P34932 | O75915 | P23634 | Q9HDC9 | Q969X5  |
| O75390  | P54819 | P83731 | Q9UQ80 | Q13045 | Q14019  |
| P31946  | Q13131 | P16615 | Q9Y625 | Q15366 | P25788  |
| P51114  | P10155 | Q70UQ0 | P52895 | P62195 | P19971  |
| Q71U36  | Q8IZP2 | Q13131 | P47897 | O60716 | Q02790  |
| P53634  | Q8N8S7 | P27658 | P62244 | O95302 | Q7Z6Z7  |
| Q9H1E5  | Q9NZW5 | P54802 | Q15046 | Q9BVA1 | P28072  |
| P27658  | Q13423 | Q969X5 | Q9NR31 | P06703 | Q9Y265  |
| Q04917  | Q9NYU2 | P50479 | Q9NR45 | Q10471 | P27658  |
| P63173  | O43852 | O95302 | Q99873 | Q9Y5X1 | P61353  |
| O00487  | P10619 | P14174 | O60716 | O15145 | P25787  |
| P10155  | P62280 | P14555 | P61160 | P30520 | P60228  |
| P27487  | Q02543 | P62318 | P36542 | Q8TBQ9 | Q9Y646  |
| P35268  | P62750 | P29218 | Q7L576 | P10155 | P47897  |
| P41091  | Q8IWA5 | Q13492 | P55209 | P55884 | Q13045  |
| Q9Y625  | P17612 | P17405 | Q14956 | P84098 | P33176  |
| P11117  | P08582 | P32969 | Q9H3N1 | O75569 | Q13131  |
| Q13423  | P84103 | P30040 | P61981 | P62753 | P16615  |
| Q08257  | Q07955 | P32455 | Q71U36 | O43747 | Q8NHP8  |
| P19320  | P21283 | P40763 | Q12765 | P31946 | P13804  |
| O75340  | P46459 | P36957 | P19105 | P07910 | Q9Y6C2  |
| Q13045  | Q99798 | P46782 | P62495 | P83731 | O75915  |
| O75533  | P16112 | Q99613 | P08962 | P48163 | Q8NB,JS |
| O75718  | P08962 | Q12765 | P12277 | Q9UQ80 | P27695  |
| P62829  | P68371 | O14980 | P27338 | P62888 | P48509  |
| P52895  | P55735 | Q07955 | Q8N1G4 | P30046 | P17980  |
| P23634  | P16615 | Q76M96 | Q13325 | P62495 | P61019  |
| P53801  | Q13425 | P46779 | Q14240 | Q9GZV4 | Q13423  |
| Q06323  | P32969 | Q9BVC6 | P13861 | P28074 | P51178  |
| P83731  | P45974 | P62495 | Q15005 | Q9C0C2 | P10155  |
| P84077  | P52895 | P55884 | O43747 | Q70UQ0 | P43034  |
| P12277  | Q9HC38 | Q14847 | Q12797 | Q15075 | P35268  |
| P15848  | O60493 | P52895 | Q92747 | Q9Y6C9 | Q9HB40  |
| Q9HC38  | Q99873 | P62330 | P84077 | O15173 | Q5JWF2  |
| P14555  | Q5JWF2 | P43304 | P53801 | Q71U36 | P45877  |
| O43399  | O75351 | P62070 | P02765 | P08648 | Q9HC38  |

|        |        |        |        |        |        |
|--------|--------|--------|--------|--------|--------|
| Q15046 | P54578 | Q8NBJ5 | O00754 | Q8WX93 | Q15417 |
| P25789 | Q14240 | P46776 | Q9Y230 | P21399 | P27144 |
| Q8IV08 | Q13885 | Q9UHL4 | Q9UK22 | Q96CW1 | Q9NRV9 |
| P47897 | P12268 | P30419 | P21399 | O75533 | Q8WUJ3 |
| P30043 | Q8IV08 | P51665 | P10599 | O15427 | Q07955 |
| P21964 | Q9BWM7 | P62913 | Q9Y224 | P10301 | P68133 |
| P33527 | P49589 | O14494 | P49257 | P36542 | P33527 |
| P13716 | Q12907 | P14550 | P14174 | Q01105 | Q9Y281 |
| P27144 | Q9Y4F1 | Q95747 | O15145 | Q14554 | Q16698 |
| P51571 | P35222 | P13804 | P35222 | P38117 | Q02809 |
| Q14203 | P63162 | Q01844 | Q13404 | O94808 | P09622 |
| P61353 | P55884 | Q15181 | P28074 | P21810 | O14735 |
| P62191 | Q96IJ6 | Q14192 | Q15181 | P68036 | Q13885 |
| P11498 | Q02978 | P78344 | Q9UHL4 | P50281 | P62910 |
| P23381 | Q08722 | Q94855 | O14880 | P25789 | Q6EMK4 |
| P50570 | O60749 | Q9Y6K5 | P15848 | Q9HB40 | P10301 |
| P61009 | Q63ZY3 | P10619 | O94905 | P49207 | O00203 |
| P62910 | O15118 | P11586 | Q92896 | E9PAV3 | Q13243 |
| Q92905 | P15586 | Q16563 | Q86UE4 | Q9UBR2 | P08294 |
| P35613 | Q9BVC6 | O14617 | Q15746 | P60903 | P35221 |
| P14174 | P26639 | P08582 | Q8NBJ7 | P31948 | P27635 |
| P46926 | P07741 | Q6DD88 | Q13131 | P48147 | P01011 |
| O00429 | P24752 | P24534 | P15311 | P40616 | P49755 |
| Q9BUF5 | Q9NR12 | Q9NVJ2 | Q9P0L0 | P55263 | P55263 |
| Q9Y6C9 | P12955 | P62820 | O60493 | P06730 | P83731 |
| P99999 | P26196 | P84077 | P11166 | P48509 | P52895 |
| O00232 | P51571 | Q02978 | P04181 | Q9UBG0 | O75347 |
| Q8IWA5 | P24534 | P45877 | P10909 | P62266 | P31040 |
| Q13620 | Q92598 | P13716 | P28072 | Q96AE4 | Q15181 |
| O15145 | P08493 | P36776 | P55735 | Q15046 | P30085 |
| P61619 | Q9NTK5 | P49589 | P06748 | Q9Y3B3 | Q6P2Q9 |
| P33947 | Q9Y3D6 | Q9Y2E5 | Q9UBR2 | Q92896 | P54886 |
| P49257 | P25787 | Q13423 | Q15417 | P23141 | Q969H8 |
| P35475 | P51665 | P27695 | P35998 | Q969X5 | Q92598 |
| Q969H8 | P04181 | P61160 | P68133 | P47755 | P43307 |
| P48509 | Q6EMK4 | P42704 | Q8NHP8 | P21926 | P27338 |
| P32969 | P62195 | Q96HE7 | P14550 | P61163 | Q9UQ80 |
| P23141 | O14744 | P49720 | P10619 | Q16563 | P21399 |
| P25786 | Q5JXB2 | P27348 | Q9BTU6 | P01009 | P42765 |
| P07910 | P21926 | P31150 | P51571 | P27144 | Q8IWA5 |
| O15427 | Q9UBS4 | Q15019 | Q15257 | P28066 | P62495 |
| Q03252 | P50570 | O14880 | Q8IWA5 | P28482 | Q92945 |
| Q9Y3D6 | Q9UBG0 | P36507 | P42766 | P08582 | P04062 |
| Q12765 | Q12797 | P98082 | O15144 | Q96IJ6 | P51991 |
| O14558 | P62266 | Q9UL25 | P62750 | O15511 | P51688 |
| P55209 | P54652 | P27635 | P05161 | P98066 | Q9NQG5 |
| O15511 | Q9H4G0 | Q15257 | P51991 | P67812 | Q9NTK5 |
| P15311 | Q07812 | Q9UNH7 | P47756 | P68133 | Q86UP2 |
| P51888 | P55209 | O00429 | Q6DD88 | O76094 | Q14240 |
| Q9Y285 | Q9UBQ7 | P26022 | Q99829 | P20042 | Q9BVK6 |
| P46976 | P35080 | Q9H9B4 | O15371 | Q96AG4 | O75116 |
| P62280 | P48507 | P04181 | P48509 | P04066 | P47756 |
| P54920 | P22695 | Q02218 | Q9UHQ9 | Q53TN4 | P31150 |
| Q9P0L0 | Q70UQ0 | P09936 | P61163 | Q9NR45 | P15586 |
| Q9Y2E5 | P08648 | P42765 | P41091 | P31040 | O15371 |
| P35754 | P36776 | P51888 | P46776 | P60891 | P46063 |
| P46778 | P09493 | Q14914 | O75915 | P20618 | P62913 |
| O75964 | P08195 | O75533 | Q9Y3B3 | P35222 | P50281 |
| P05455 | P53990 | Q12907 | Q07866 | P51688 | O15173 |
| P46776 | Q9H4M9 | Q9UBS4 | P48643 | P50453 | P61981 |

|        |        |        |        |        |        |
|--------|--------|--------|--------|--------|--------|
| Q8N1G4 | P83731 | P15848 | P05413 | Q9Y5P6 | P42226 |
| P54619 | Q13045 | O00487 | P09110 | Q12906 | O75436 |
| O95747 | Q02218 | P04004 | Q9Y646 | P30043 | O43747 |
| P43307 | P49419 | O00754 | Q13243 | Q9UL25 | P35754 |
| Q13488 | P15848 | Q92900 | P47755 | P05413 | O95373 |
| Q9BR76 | Q15233 | P52597 | P50281 | P42765 | P49720 |
| P61026 | Q99714 | Q8IYD1 | Q5SSJ5 | Q9Y625 | O15511 |
| Q9HB40 | P19623 | Q96G03 | Q13098 | P10599 | Q15758 |
| P53007 | P42766 | P49721 | Q86W92 | P31153 | Q12765 |
| Q13492 | P61106 | P30085 | P16930 | Q7Z6Z7 | Q9UK22 |
| P67812 | Q92896 | P48163 | P83731 | P22061 | Q12929 |
| P35221 | P13716 | O00303 | P17844 | O95373 | P54709 |
| O95373 | P48163 | O14974 | P08582 | Q9Y262 | Q15043 |
| O00264 | Q92841 | P67812 | P32969 | Q14914 | P41091 |
| Q9BVK6 | O15511 | Q13404 | Q9HC38 | P18077 | O5SSJ5 |
| Q15758 | P20073 | Q9NQW7 | Q99879 | Q00577 | P62191 |
| P37108 | P51688 | Q16222 | P51572 | Q9NVD7 | Q9Y6B6 |
| Q12904 | P11498 | P09622 | O15511 | P26196 | P15311 |
| P17844 | Q9NR45 | P48506 | O60784 | P10644 | Q9UNH7 |
| P04632 | Q15046 | P84103 | P62910 | P51178 | O15260 |
| Q9UI12 | Q43747 | Q9NSD9 | P54819 | P09622 | Q9UBQ7 |
| P61106 | P15531 | P10620 | Q08257 | P05161 | P10915 |
| P10644 | P52597 | P61106 | Q9UH99 | P57088 | O15145 |
| O15260 | P09012 | Q8TCJ2 | P08195 | P51571 | P31930 |
| P06703 | O95084 | P62750 | Q9BVC6 | Q8IYD1 | P11117 |
| Q12792 | P61019 | P15586 | P31040 | Q8N1G4 | P67775 |
| Q05707 | P05198 | O94874 | P09417 | Q9H0W9 | P33947 |
| Q14008 | P51572 | Q9Y230 | P09543 | P07585 | Q92841 |
| Q13724 | Q43592 | P46063 | P22307 | Q9BVK6 | P08962 |
| P60903 | P35268 | P84098 | P27144 | P17844 | Q16222 |
| P31327 | P30043 | Q8WUJ3 | P48163 | Q9UKK3 | P15848 |
| Q9NR12 | Q9NRV9 | P07741 | P17405 | P21281 | P43686 |
| P49207 | P62910 | O95786 | P07602 | O60493 | P14314 |
| Q9NR45 | Q9HD45 | Q00765 | P60903 | Q9Y6B6 | P46776 |
| P61160 | P49257 | Q5SSJ5 | Q16563 | Q8IWA5 | O43390 |
| Q13418 | P17050 | Q9BRL6 | O15118 | P60228 | Q9P0L0 |
| P51648 | Q15758 | P07585 | O94874 | Q9HC38 | Q15005 |
| P49720 | Q96CX2 | Q00577 | P40616 | Q9NY33 | P02743 |
| P31150 | Q9Y6C9 | P09543 | P15586 | Q15257 | Q13425 |
| P17050 | Q8WX93 | Q53GQ0 | Q9UBS4 | P62330 | O15460 |
| P27708 | Q04917 | Q99714 | O00429 | Q8N8S7 | Q16539 |
| P61421 | P13798 | Q15631 | P49419 | P46776 | P40763 |
| Q9Y4F1 | P43686 | O95394 | O43143 | P35268 | Q8N1G4 |
| Q10471 | Q6YHK3 | Q9Y6B6 | P45877 | P10909 | P17050 |
| P46779 | P67775 | Q12768 | Q14258 | O94855 | Q9NY33 |
| O75131 | P19320 | Q9UJS0 | Q8IXB1 | P19105 | O00303 |
| O75629 | Q7L5N1 | Q9UH65 | Q06124 | P68371 | P36957 |
| A0AVT1 | P62495 | Q9NR45 | Q14192 | P27338 | Q92973 |
| P07711 | Q9BS40 | Q9NYU2 | O75533 | Q8IWE2 | P46778 |
| P21926 | Q9UHW9 | Q14554 | Q9HB40 | P49720 | Q9BS40 |
| P49419 | Q9H0U4 | P53007 | Q9Y6K5 | P17050 | P67812 |
| P28066 | P51884 | P35637 | P24539 | P00915 | Q14914 |
| P36542 | P57088 | P36542 | Q9NVD7 | O00232 | O00487 |
| Q8IVF2 | P02458 | Q9NVD7 | P22413 | P35221 | P28161 |
| P15170 | P53004 | Q9UIJ7 | Q6YHK3 | Q03169 | O75964 |
| P62266 | Q9Y230 | Q15758 | P67812 | P42704 | P62266 |
| Q8N8S7 | P62316 | Q07812 | Q9UIJ7 | P61803 | Q15257 |
| Q9UNH7 | P49720 | O15031 | Q7Z6Z7 | P18084 | P51888 |
| Q92616 | P07602 | O00232 | O95865 | Q9Y2D5 | Q14956 |
| P67775 | Q6IAA8 | Q13765 | O75131 | P50479 | P63279 |

|        |        |        |        |
|--------|--------|--------|--------|
| P13798 | Q9H488 | Q9H4M9 | P55010 |
| Q13151 | Q92973 | P51572 | P63167 |
| P10915 | P35475 | P55735 | Q27J81 |
| P09619 | Q9Y224 | Q16531 | P08493 |
| Q9Y3B3 | P50402 | Q969H8 | P48507 |
| P50281 | O00487 | O15511 | Q9U112 |
| P49721 | P09543 | Q5JTV8 | Q9Y2A7 |
| Q15629 | P31150 | Q92930 | P09493 |
| P84103 | P42785 | P43686 | P27635 |
| O00186 | P27658 | P62316 | Q969X5 |
| P14314 | Q13347 | P04066 | P00403 |
| P42167 | Q15631 | P26196 | P46778 |
| Q13148 | Q12929 | P28072 | P30043 |
| Q9Y2D5 | P36405 | O60488 | Q92945 |
| P62318 | Q9Y5X1 | Q8TB61 | P33947 |
| Q13247 | Q16778 | P50570 | P13807 |
| P36543 | P09936 | Q13347 | O95786 |
| O95394 | Q9UNN8 | P48507 | Q92900 |
| Q7Z6Z7 | Q9BRA2 | P67775 | P49720 |
| P63167 | Q13492 | P98066 | P53999 |
| P68371 | Q9Y625 | Q14315 | P23141 |
| Q96HE7 | P43243 | Q9P289 | Q9NQW7 |
| Q9UNN8 | Q9UKK3 | P27338 | Q13148 |
| P54819 | P00492 | Q9Y2A7 | P61026 |
| Q9P035 | P68036 | P23141 | P61158 |
| Q53TN4 | P60866 | Q9BQE5 | P27658 |
| P63162 | P32456 | P33527 | P31948 |
| Q99880 | P47914 | O95865 | Q9Y262 |
| Q08209 | Q99805 | P02765 | Q8TCT8 |
| P54652 | P46776 | Q15043 | P46779 |
| P54687 | P67812 | Q8IV08 | P21926 |
| P51688 | Q07666 | P29590 | F51648 |
| Q9UHQ9 | Q9UJU6 | P36543 | Q9UJS0 |
| Q15155 | P35573 | Q9Y2G5 | Q9HDC9 |
| P12236 | Q9BT78 | P17980 | Q9Y512 |
| P25787 | Q15435 | P38117 | Q9UBG0 |
| Q9UL25 | O00186 | P54652 | P11717 |
| Q13425 | P10620 | Q9Y3I0 | Q8TBQ9 |
| Q9BVC6 | P43307 | Q9UBG0 | P13804 |
| P98082 | Q15257 | P30046 | Q14554 |
| Q8NCC3 | Q9HB40 | P15531 | P35268 |
| Q07812 | Q06124 | P28065 | Q9BVK6 |
| P14324 | P84098 | Q99436 | P36776 |
| O14735 | O95394 | P54578 | Q6PKG0 |
| Q9UP95 | Q9ULC4 | P52943 | P62316 |
| Q9UBG0 | Q13151 | Q13148 | Q07955 |
| Q3LXA3 | Q92688 | Q9NTK5 | P51888 |
| P06753 | P12277 | O43747 | P04066 |
| Q13867 | P28161 | Q8N1G4 | P62829 |
| Q96HY6 | P37108 | O95197 | A0AVT1 |
| P31937 | P15311 | P62829 | P27361 |
| P60891 | P46778 | Q9H3P7 | Q15717 |
| Q9BZF1 | P29966 | P17050 | O00487 |
| Q4G0F5 | Q9Y6B6 | P11117 | O75629 |
| P17980 | P31937 | Q02952 | P43243 |
| Q9NTJ5 | Q13148 | P08123 | P46063 |
| P47914 | Q9P2B2 | O15371 | Q9Y3F4 |
| Q13304 | Q8NBJ7 | P50453 | P26196 |
| Q14956 | P49721 | Q9HB40 | Q8WUJ3 |
| P31749 | Q8N357 | Q9Y2D5 | Q5JPE7 |

|        |        |
|--------|--------|
| P62316 | P18077 |
| P54727 | P00491 |
| Q5JPE7 | O00429 |
| Q13263 | P62330 |
| A0FGR8 | P46926 |
| O75347 | Q9Y2A7 |
| Q13347 | Q96G03 |
| Q9H1E5 | P10909 |
| O00754 | P28062 |
| P11117 | O75718 |
| Q13425 | P32455 |
| P48739 | Q16563 |
| Q15043 | Q8IVF2 |
| Q1KMD3 | Q9H9B4 |
| P32456 | P14678 |
| Q9Y2A7 | O14617 |
| P13693 | O00232 |
| Q8NBJ7 | Q9NPQ8 |
| Q9NQG5 | P11498 |
| P50570 | P00403 |
| P12955 | Q99805 |
| P27658 | Q9UJS0 |
| P08493 | Q8TBQ9 |
| P56192 | Q9BVC6 |
| Q9Y383 | Q13155 |
| Q12907 | P68402 |
| P02743 | P62316 |
| P07711 | P63167 |
| Q9Y2E5 | P60891 |
| P11498 | Q9NR12 |
| P09972 | P11166 |
| P62847 | P09972 |
| Q15417 | Q9Y625 |
| P00492 | P04004 |
| Q8IXB1 | Q9UBG0 |
| O00203 | P55036 |
| Q99436 | P49773 |
| O60784 | Q15435 |
| O94874 | Q8TCJ2 |
| Q9NQW7 | Q99798 |
| P36543 | Q5JTV8 |
| O15260 | Q16543 |
| P03956 | P49721 |
| P05141 | P36543 |
| Q8TCJ2 | P15531 |
| Q9Y2G5 | P84103 |
| P84103 | P47914 |
| Q99729 | P53007 |
| P01861 | P00450 |
| Q9NQL2 | P54578 |
| P52597 | P68371 |
| P35613 | O95394 |
| P06753 | Q9UBI6 |
| O75351 | P98082 |
| P28161 | P84098 |
| P35354 | P12277 |
| Q07666 | Q9NVD7 |
| Q9UH99 | P08195 |
| P17980 | P08123 |
| P09874 | P42330 |

|        |        |         |         |        |         |
|--------|--------|---------|---------|--------|---------|
| P61086 | P21810 | P27708  | P63162  | Q9Y5S2 | Q562R1  |
| O00303 | O76094 | P35268  | O15305  | P12004 | P20742  |
| Q7L2H7 | P20908 | P06703  | P54727  | P63162 | P24390  |
| P30520 | O15031 | Q00688  | Q9UNS2  | Q9Y512 | P06730  |
| Q9BRA2 | Q7Z3U7 | Q9BVK6  | O15427  | Q92598 | O43143  |
| P19525 | P35270 | Q9UPN3  | P48059  | Q99805 | P11177  |
| Q96JY6 | P36543 | P00403  | P43686  | P55010 | P62318  |
| Q14258 | Q5JTV8 | P63167  | O75436  | Q9P289 | Q8NBJ7  |
| P08754 | O15260 | P63092  | P61106  | Q9BZF1 | O00764  |
| Q9BS40 | Q9H3P7 | Q01105  | Q15758  | P08754 | Q95486  |
| O60784 | O00442 | Q12792  | Q92688  | P62857 | Q9UJU6  |
| Q02952 | Q9BZZ5 | Q9NY65  | Q8N8S7  | P04271 | Q92572  |
| Q9BPX5 | Q9Y2E5 | O75340  | P05141  | P24390 | Q6PGP7  |
| Q92747 | P20742 | Q99733  | Q8TCJ2  | P31150 | P54819  |
| Q8TAT6 | Q5VYK3 | P42226  | A0FGR8  | Q9NRW1 | Q9Y3E5  |
| P62330 | Q71U36 | Q9BS40  | P49721  | P62314 | Q9UUKK3 |
| P62942 | P84085 | P21926  | Q9BRL6  | P10620 | Q7L2H7  |
| P62314 | Q9UBI6 | P45974  | P68402  | Q9Y3E0 | Q13185  |
| Q13283 | O75964 | P06753  | O60488  | P35080 | P62829  |
| P62857 | P62314 | P35754  | P53992  | O75629 | P52943  |
| Q01105 | Q9H299 | P68402  | E9PAV3  | P46778 | P29144  |
| P06730 | P35754 | Q8IXB1  | Q96IJ6  | Q9Y277 | P08243  |
| P62879 | O94973 | P22061  | P10620  | Q9Y3E5 | O75955  |
| Q14157 | Q9Y3E0 | P54819  | P47914  | Q9UHA4 | Q9Y3E0  |
| P42330 | P52943 | P09110  | P62263  | Q9NRP0 | Q9UM00  |
| Q9H299 | Q9UHA4 | Q9P035  | Q76M96  | Q9UM00 | Q9NV70  |
| Q9Y6E0 | P62837 | P14314  | P49773  | P62263 | Q9NQL2  |
| O60869 | P62263 | Q6P179  | O00303  | P35270 | Q9H3U7  |
| P42226 | P08294 | P47914  | Q13501  | Q14696 | Q9H299  |
| P53992 | P62330 | O75352  | Q9Y3B8  | Q9Y3D6 | Q9H0E2  |
| Q9NRP0 | Q8N0U8 | P08754  | Q96KP1  | Q07812 | Q9BZF1  |
| Q8N0U8 | P50479 | O15258  | Q9H4G0  | Q8N0U8 | Q9BRL6  |
| P57088 | Q9UK22 | P46778  | P36543  | O14735 | Q9BQB6  |
| Q99805 | Q6IBS0 | P62266  | Q16836  | Q96EK6 | Q96PU5  |
| Q9Y3E0 | Q8NEV1 | Q9Y6C9  | P17980  | P49721 | Q96AB3  |
| P24390 | Q9NQG5 | P49207  | Q9NY33  | Q7L2H7 | Q92597  |
| P36405 | Q9UNZ2 | Q16543  | P62318  | Q96HY6 | Q8NCC3  |
| Q9BTU6 | O75352 | P03956  | Q9UUKK9 | Q86TX2 | Q8N0U8  |
| Q6IAA8 | P29218 | Q9UUKK3 | P19525  | O00487 | Q59GN2  |
| O00754 | P53007 | P63173  | Q9BQE5  | O75352 | Q14157  |
| Q9HD45 | Q9UKS6 | P56134  | P18084  | P53007 | Q13286  |
| Q9NYL4 | O75569 | Q15629  | Q13425  | P28845 | Q13148  |
| P10620 | Q9H3U7 | P00390  | P13647  | P50552 | Q07812  |
| Q8IZV5 | Q14728 | P11177  | P84098  | P62333 | Q04941  |
| Q9UDW1 | Q13155 | Q99805  | P53007  | Q13287 | Q03169  |
| O75306 | Q14254 | Q9H4G0  | Q9Y2G5  | Q9H8H3 | P63173  |
| Q9P0J0 | O60784 | Q9UP95  | Q8TAT6  | Q9BV86 | P62942  |
| P13073 | O75955 | P68371  | P35270  | Q9H9B4 | P35354  |
| P04181 | Q15043 | Q9UBI6  | Q7L2H7  | Q02790 | P28845  |
| P11177 | Q8N142 | P62942  | P60891  | Q6NUM9 | P20810  |
| Q9Y3E5 | P04066 | P62314  | Q9NRV9  | Q13148 | P10620  |
| O14936 | P17980 | Q9H299  | Q9H0E2  | O00154 | P08708  |
| P07305 | Q9NQL2 | P10301  | Q3KQV9  | Q14728 | P08493  |
| P51452 | P26368 | P62847  | P42226  | Q13155 | P04271  |
| P09874 | Q43294 | Q04941  | P35754  | Q9Y4G6 | O60784  |
| P62993 | Q14956 | P26885  | P62847  | P26022 | O43583  |
| Q5JTV8 | P22307 | Q6IAA8  | Q969Q0  | P48426 | O00483  |
| Q86X55 | P48506 | Q9NRP0  | Q14696  | P00390 | P21926  |
| Q16774 | Q6PGP7 | Q9UM00  | Q96FW1  | Q13325 | O43865  |
| O75351 | Q02952 | Q96AB3  | P31937  | P11177 | Q9H1E5  |

|        |        |        |        |        |        |
|--------|--------|--------|--------|--------|--------|
| Q76M96 | Q14157 | P62263 | P50552 | P50416 | Q8N8S7 |
| P62847 | P55036 | P35270 | P31749 | P11310 | P21283 |
| P62263 | Q9NQW1 | Q9Y3B8 | Q8NBJ5 | Q9BTU6 | P53801 |
| Q8NHP1 | P42765 | P61225 | P37108 | P28288 | Q8N142 |
| Q9H0R4 | Q9Y2G5 | P13073 | P60866 | Q8N766 | P62847 |
| P16930 | P33527 | P01033 | O75340 | P08243 | P62314 |
| P55010 | Q15629 | P57088 | P55036 | Q92945 | Q12792 |
| P08243 | P14324 | Q8NEV1 | P09874 | P22307 | Q9UBS4 |
| Q3KQV9 | Q13098 | Q9H993 | P68366 | A2RUS2 | P53634 |
| P36776 | P50281 | P27701 | P68371 | Q9UBV2 | P26196 |
| P40616 | O94874 | Q9H1E5 | P42330 | Q8NE71 | P53992 |
| P09493 | O75844 | P09661 | P63173 | Q92750 | Q9Y3F4 |
| O60637 | P55010 | P00918 | P04271 | Q92900 | Q9Y3U8 |
| P20742 | Q8N1G4 | P15289 | Q01629 | Q14157 | O75533 |
| O95865 | P00390 | P63162 | P62942 | Q13283 | Q99988 |
| P09972 | Q96SU4 | Q9NX46 | P62314 | Q9NR12 | O43813 |
| Q16543 | P55809 | Q8N357 | P35080 | Q13177 | P12004 |
| Q8TBQ9 | P02743 | Q96JY6 | P06703 | P16930 | Q9NRW1 |
| P00403 | Q13011 | Q15435 | P08708 | O75340 | P35637 |
| P00390 | Q01844 | Q86X55 | P02766 | P41091 | P24534 |
| Q15005 | P51991 | O00442 | Q6IAA8 | P55036 | O95302 |
| Q00577 | P11177 | Q00796 | Q9NRP0 | Q5JTV8 | P51572 |
| O75116 | Q16563 | P48426 | Q9UM00 | Q16774 | Q7RTS9 |
| O15371 | Q9UL46 | Q8N142 | Q9BQB6 | P55039 | Q9BR76 |
| O43813 | P48637 | O43286 | Q9UNL2 | Q96PU5 | Q13283 |
| Q8NBJ7 | P06730 | Q93052 | P62837 | P28072 | P23141 |
| Q6P2Q9 | Q9P035 | Q02790 | Q9UNN8 | Q9UJU6 | Q9Y5X1 |
| Q14554 | P20042 | P08195 | Q07812 | O75534 | Q9P289 |
| Q99729 | Q27J81 | P22413 | P08294 | Q9H3U7 | Q9BTU6 |
| Q16563 | P12236 | Q13425 | P13073 | P53801 | P23634 |
| Q9UHA4 | P38919 | Q13724 | O14735 | P61160 | O14744 |
| P68036 | Q9BPX5 | P20742 | F57088 | P53992 | Q8IXB1 |
| P19105 | Q14165 | Q9BZF1 | Q8NEV1 | O15258 | P00488 |
| P15586 | P56192 | Q14157 | P28065 | P17174 | P57088 |
| Q13404 | Q56UQ5 | Q6YHK3 | O75352 | O60749 | Q16778 |
| P43034 | Q8WWM9 | Q13561 | Q9H1E5 | O15031 | Q01105 |
| Q9Y3U8 | Q13418 | Q9UGP8 | Q9BV86 | P11717 | O95084 |
| P15289 | P00403 | P09669 | Q96KA5 | P14555 | Q96M27 |
| P29218 | Q96HE7 | Q8N0U8 | Q14728 | Q9BQE5 | P56134 |
| Q13155 | Q53TN4 | Q8WX93 | O76094 | Q14240 | P08648 |
| P35270 | Q15181 | P05413 | Q13155 | P36957 | A0FGR8 |
| Q9NQW7 | O00429 | Q92688 | P36406 | P49585 | P51665 |
| P08648 | Q8NEU8 | P10909 | O00442 | O00442 | P23588 |
| Q07666 | P31323 | P22307 | P20810 | P35637 | O14558 |
| P50213 | Q9UH99 | P08236 | Q9Y6G9 | P14324 | Q13492 |
| Q9HB07 | Q16881 | P11498 | P00390 | O15371 | P40616 |
| Q9BTW9 | Q9Y512 | Q5VYK3 | Q99805 | P62318 | O14494 |
| P35222 | P17174 | P25787 | Q3LXA3 | O75348 | Q8N766 |
| P31930 | P31040 | Q9HC07 | Q8TD55 | Q969H8 | P84077 |
| O60716 | Q96EK6 | P42167 | P20742 | Q9P0L0 | Q8IV08 |
| O76094 | Q06033 | Q14728 | P30566 | P07602 | O75352 |
| Q92900 | Q8IVF2 | Q9UHQ9 | P28288 | Q9UP95 | Q9UNAO |
| P10301 | P02766 | Q12929 | P35573 | Q5JWF2 | P35222 |
| Q9Y281 | P30566 | Q9Y3D6 | P26368 | Q15942 | P30084 |
| Q9UM00 | Q9BZF1 | O60637 | P00450 | Q96S97 | O60493 |
| Q96A65 | Q02790 | P55010 | Q12768 | P08123 | P02766 |
| P29992 | P20339 | Q9HDC9 | Q9BZF1 | Q5SSJ5 | Q9C0E8 |
| P53680 | Q9NRP0 | Q14956 | O60313 | P54578 | Q9C0C2 |
| Q7L523 | O75629 | O00186 | Q02952 | Q6IAA8 | P01116 |
| P84098 | Q9UIJ7 | P27144 | Q14157 | P08294 | Q9NRP0 |

|        |        |        |        |        |        |
|--------|--------|--------|--------|--------|--------|
| P10909 | Q16222 | Q9Y3B3 | Q9UJK3 | P55145 | P55735 |
| Q15257 | Q9BXP5 | P13647 | P24752 | O95197 | Q6DD88 |
| Q9BWM7 | O60869 | P22695 | P54687 | Q13098 | P14866 |
| P14735 | O15498 | Q9Y224 | O75569 | Q9NZL4 | Q93008 |
| P22307 | P26583 | P09012 | Q13283 | Q13637 | P06703 |
| P54727 | P62070 | P28845 | Q13492 | Q9UDW1 | Q92896 |
| Q9NQ29 | O95373 | P08842 | Q9Y2D5 | O15305 | O95573 |
| Q9UBS4 | Q9Y3B8 | Q96SU4 | Q00577 | Q86WV6 | P50552 |
| O95302 | P07305 | Q9P0L0 | P09913 | O14936 | Q14165 |
| Q9NZL9 | O43390 | Q9UBQ7 | P14314 | Q12765 | Q8NE71 |
| Q04637 | P08123 | Q07666 | P56192 | Q08209 | Q12965 |
| Q9Y3A5 | O00764 | P62312 | P31150 | O43809 | Q5JNZ5 |
| P22102 | Q00577 | Q15233 | P11233 | P62273 | O95831 |
| Q99519 | O15258 | Q9Y5X1 | Q8N0U8 | Q14165 | P13807 |
| Q9NTK5 | P10915 | Q99961 | Q13310 | Q9NVJ2 | O14579 |
| P30626 | Q14554 | P35222 | P14324 | P46063 | P07585 |
| Q9BQE5 | P28072 | Q9H2U2 | O15260 | O14879 | Q9NQW7 |
| O15498 | Q99733 | Q13501 | Q15435 | Q13409 | Q9UM54 |
| P01008 | O75368 | Q13155 | O14974 | P0DOY2 | P07602 |
| Q8NCA5 | Q9Y3U8 | O14579 | P24390 | P62280 | O00115 |
| P08123 | P06703 | Q66UQ5 | P27701 | P02652 | P55884 |
| P62495 | P11117 | Q9UNM6 | Q86WV6 | Q8IZP2 | Q15393 |
| P15531 | P29279 | P07602 | Q8NC56 | Q9Y281 | P55010 |
| P31948 | Q9BTU6 | P49419 | P78559 | Q9UBI6 | P09619 |
| Q8N142 | P49207 | Q460N5 | Q9Y277 | P04004 | Q9UN37 |
| O14495 | Q969Q0 | O43813 | O43865 | Q9Y230 | Q53EP0 |
| O00764 | P60891 | P24752 | P30837 | P43686 | Q9BWM7 |
| P36957 | O95837 | O75629 | P28161 | Q16778 | P61626 |
| Q16822 | Q15005 | Q53TN4 | Q13103 | P26368 | P13716 |
| O14974 | Q14376 | O75821 | Q9NZW5 | P35754 | Q9UHQ9 |
| P09936 | Q92538 | P50281 | Q8N142 | P15311 | O75340 |
| Q13177 | P09417 | Q9Y625 | Q9UNZ2 | P00403 | P68036 |
| P54578 | P29144 | Q08722 | P28070 | P19525 | P04066 |
| Q9Y3F4 | Q9NPF4 | Q9HD45 | Q9UNH7 | P25786 | Q9H0B6 |
| P08237 | Q9BRL6 | AOAVT1 | P50213 | P28062 | Q7L5N1 |
| P22061 | O14498 | O75116 | Q5JWF2 | Q8IZP0 | Q08722 |
| P48739 | Q04760 | P60468 | P15531 | Q8TCT8 | Q04837 |
| Q9BZK7 | O94760 | Q9UHA4 | O60684 | P60660 | Q8NCA5 |
| P07203 | P60033 | Q9Y3F4 | Q9UHW9 | Q9UNH7 | O43615 |
| Q8IXB1 | O43143 | P10915 | P26885 | P36507 | Q9Y3B3 |
| P01033 | O14495 | P48637 | Q04837 | Q96AC1 | O60716 |
| Q15043 | Q562R1 | O75368 | P22695 | Q9H0E2 | P49589 |
| P00915 | Q15583 | Q969Q0 | P24534 | P14314 | Q99729 |
| P40763 | P27635 | P09972 | Q1KMD3 | Q8N697 | P54920 |
| P43686 | Q9UKX5 | P21810 | Q15691 | O43143 | P22695 |
| P08236 | P02533 | P13861 | P03956 | Q9H299 | O95865 |
| P07741 | P25786 | O75694 | O14617 | Q16881 | P20618 |
| Q9H0U3 | Q99519 | Q93008 | Q9Y4G6 | P62942 | P00492 |
| O14617 | P51452 | P24390 | P54578 | P17405 | Q96I24 |
| P68133 | P54687 | O76024 | P08621 | P31930 | Q96JY6 |
| P13804 | Q14498 | Q8NC56 | Q07666 | Q99733 | Q6YHK3 |
| P10515 | O15371 | P26368 | Q9UGP8 | P51452 | O75569 |
| P27635 | P14866 | P28482 | O75828 | P29218 | O00534 |
| P22694 | Q13310 | P35080 | O75718 | P42226 | O14974 |
| Q12797 | O15460 | P61009 | P35221 | P16401 | P98066 |
| Q9NV70 | P01008 | Q7L5N1 | P48147 | Q13630 | O60637 |
| Q9H0E2 | P60468 | Q5EB52 | Q9H299 | Q04837 | Q8IYD1 |
| Q99873 | O95831 | Q96CV9 | Q15629 | Q9NZU5 | Q86X55 |
| Q59GN2 | O94875 | Q99729 | P08243 | Q9UNF1 | Q99519 |
| P20042 | Q13177 | P31749 | P38117 | Q9P2B2 | P51809 |



|        |        |        |        |        |        |
|--------|--------|--------|--------|--------|--------|
| P30046 | O14980 | P35221 | Q99733 | P62837 | Q9UKE5 |
| Q14192 | Q96ST3 | P51452 | Q9UBI6 | O60637 | O95747 |
| P55287 | O60831 | P16435 | Q8TF72 | Q3KQV9 | P61106 |
| Q99733 | Q92905 | Q9Y3E0 | Q9Y5M8 | O00764 | Q13616 |
| P48556 | P30085 | Q13283 | P07305 | Q8NCC3 | Q08AM6 |
| Q14914 | Q8NBJ5 | P50552 | Q99798 | O94875 | Q92747 |
| O95197 | P26885 | O96005 | P07585 | Q9UJ22 | P31948 |
| P02766 | Q9Y3A5 | P07305 | Q01650 | Q9Y6W5 | P48506 |
| P29966 | Q7Z6Z7 | Q9BXP5 | Q96PU5 | Q16576 | Q32P28 |
| P07602 | Q10567 | Q13243 | Q9UHA4 | P13807 | Q86W92 |
| P62750 | Q96JY6 | Q8TCT8 | P29966 | Q9Y266 | Q9P0J0 |
| Q9BYT8 | P40616 | O43143 | Q99519 | O95747 | Q99613 |
| Q00765 | P61970 | Q9BTW9 | Q16698 | Q96A65 | P22061 |
| Q13310 | Q13620 | P16112 | P07947 | P40763 | Q53TN4 |
| P01877 | Q13637 | Q9UDW1 | Q16740 | Q9BPX5 | Q9Y3D6 |
| Q9NQL2 | A1L0T0 | P35475 | O43809 | Q96124 | Q9Y6Y8 |
| Q562R1 | P55290 | Q12797 | P30046 | O75964 | P01861 |
| O43852 | P30711 | Q9BPX5 | P0DOY3 | P09012 | P16930 |
| P01009 | Q9Y266 | Q7L2H7 | O00764 | P49419 | Q9UBT2 |
| Q9Y2G5 | P08559 | Q92747 | P10915 | P08621 | Q9ULA0 |
| Q96A26 | P47755 | P54727 | P12081 | Q9BRL6 | Q9BPX5 |
| P28288 | Q9C0C2 | Q16778 | Q9NTJ5 | Q9BZQ8 | Q8WXF1 |
| Q5JWF2 | Q687X5 | P08493 | P12107 | Q12904 | O95197 |
| Q96SU4 | P14735 | P35613 | Q9UH65 | O14579 | Q9H223 |
| Q9UM22 | Q9UPN3 | P31689 | Q9Y6C9 | Q13561 | Q969Q0 |
| Q9UK22 | Q9H2U2 | O00401 | Q9Y3A5 | O00115 | O00754 |
| P22695 | Q13409 | Q8TBQ9 | P16118 | Q9HD45 | P00390 |
| P0DOY3 | O14936 | P08708 | P07203 | Q9H3N1 | O14495 |
| Q8NEV1 | Q9HAV0 | Q9BWM7 | Q969H8 | Q15717 | Q9Y5P6 |
| P51572 | P54920 | P46821 | P42167 | P08631 | Q5GH77 |
| Q13630 | P19971 | P0DOY3 | Q16775 | Q6YHK3 | Q9BRA2 |
| Q15746 | Q13144 | O14828 | P31930 | Q562R1 | Q9UNM6 |
| Q9P246 | Q14258 | Q14254 | P80217 | Q86UE4 | Q13561 |
| P09012 | P04004 | Q6VVX0 | P48739 | Q9BZZ5 | Q8TAT6 |
| Q687X5 | Q12792 | Q04917 | Q9BTW9 | P43307 | O43809 |
| P08493 | Q14019 | Q92890 | Q9P2B2 | P52569 | P13647 |
| P47755 | P05362 | Q9UJU6 | Q13151 | P00491 | P62273 |
| P13861 | Q86XP3 | O43236 | Q08209 | Q9ULA0 | Q16576 |
| Q70UQ0 | Q13283 | P60228 | P35613 | P29992 | Q5JPE7 |
| O00154 | P40763 | Q9BQB6 | Q53TN4 | Q7Z4H8 | P18754 |
| P01116 | Q92629 | P09913 | Q08722 | P30711 | O00217 |
| Q99436 | Q9UJS0 | P62879 | Q04917 | Q4G0F5 | Q8NEV1 |
| Q8N436 | P84095 | Q13596 | Q70UQ0 | Q05707 | Q9Y224 |
| Q15393 | P55795 | Q9NTJ5 | O95573 | P08559 | P61803 |
| O60271 | P62829 | P62857 | O15127 | P61086 | O43731 |
| Q9NY33 | P42330 | Q6UW68 | P29992 | P78556 | P00915 |
| Q14728 | P62333 | P20618 | P31689 | P46926 | P09012 |
| P43243 | O00154 | O75367 | P35475 | P47914 | P24752 |
| P04004 | Q6EEV6 | Q16650 | Q9UNF0 | Q9NZL9 | Q13409 |
| Q8WVV9 | P35659 | P17936 | Q9BZQ8 | Q9UBQ7 | P26885 |
| P35241 | Q92900 | Q7Z7G0 | Q9H8S9 | Q9NPQ8 | P43235 |
| O75821 | P62873 | Q9C0C2 | Q9H3U7 | O00429 | P54687 |
| P30084 | O60637 | O60869 | P02743 | Q15629 | P26447 |
| O00170 | Q15942 | Q9NYL4 | P52630 | O43390 | O75828 |
| P26885 | P36507 | P51991 | Q9C0B1 | Q96QR8 | P16112 |
| Q6VVX0 | P09622 | P30042 | O60869 | O96019 | P13861 |
| Q9BXJ9 | O15400 | P30042 | Q15942 | Q9UI12 | O15498 |
| O95573 | P17813 | Q14498 | P33527 | Q96FJ2 | P29218 |
| Q07866 | Q9NYL4 | Q9Y4F1 | O00154 | Q99720 | Q99471 |
| P29144 | Q9NTJ5 | Q9Y5X3 | Q9C0C2 | P01033 | P13798 |

|        |        |        |        |        |        |
|--------|--------|--------|--------|--------|--------|
| P33176 | Q14315 | O00764 | Q86V81 | Q9H2U2 | P54727 |
| O43396 | Q9Y3B3 | P20042 | P53680 | Q9P246 | O75348 |
| Q86U42 | Q14192 | P48449 | Q969X1 | Q92572 | Q99733 |
| Q9UH65 | Q86VV6 | O75348 | P68036 | Q9UBT2 | P36507 |
| P42566 | Q04206 | Q16836 | O95861 | Q9NZB2 | P22307 |
| Q12907 | O00471 | P18077 | Q9Y3E5 | P33527 | Q13630 |
| Q9NQR4 | Q05707 | Q15942 | Q92734 | P01116 | P43243 |
| O96019 | P00491 | Q92598 | P08237 | P07305 | P25786 |
| P84095 | P69892 | O60831 | Q99613 | O60831 | O75643 |
| P20290 | P62318 | P12277 | Q6PGP7 | O15498 | Q15020 |
| P28072 | P53634 | P01008 | Q14914 | Q96JY6 | Q9BXP5 |
| Q9UFD9 | O00754 | Q16698 | P54709 | Q15165 | P62750 |
| P31040 | P29590 | Q8TEX9 | Q5GH77 | Q8NCA5 | P14735 |
| P46108 | Q9H2G2 | P00533 | Q92598 | P43304 | Q3T906 |
| O75534 | Q9H9B4 | P53680 | Q99436 | P28065 | Q5VYK3 |
| Q9UBT2 | Q99719 | O96019 | O60504 | Q96CX2 | Q9UHB9 |
| Q9Y5M8 | Q1KMD3 | P34913 | Q9NPQ8 | P31689 | Q5EB52 |
| Q15020 | Q9C0B1 | Q13630 | P08574 | Q14254 | P48637 |
| Q5TCY1 | P51570 | Q9Y5P6 | P09972 | Q8ND30 | Q9H2Y7 |
| O75348 | Q9P0K7 | Q13867 | P60033 | P61106 | P62879 |
| Q16576 | Q14202 | Q9BXS5 | Q56UQ5 | P55735 | Q9Y277 |
| Q1KMD3 | Q8WUY3 | P30837 | P16435 | Q9Y310 | Q13177 |
| Q04837 | Q16890 | O15126 | P11177 | Q27J81 | P49747 |
| P28161 | Q43772 | Q13409 | Q8IV08 | P31323 | Q96A72 |
| P24752 | P46821 | Q06033 | P01009 | Q15233 | Q8TB61 |
| Q15233 | Q9Y2Q5 | Q9UNZ2 | P51636 | P18754 | Q9UP95 |
| Q8WWM9 | Q9UHV9 | P32456 | Q9Y3E0 | Q53EP0 | Q13098 |
| P55735 | Q9BZK7 | Q1KMD3 | P20042 | A0AVT1 | Q9UBC2 |
| Q96KA5 | Q93008 | Q9H2S5 | Q8IVF2 | P62910 | Q9NR56 |
| P14209 | Q969X5 | P31937 | P08236 | P61923 | Q9UIQ6 |
| Q8NC56 | Q02252 | P61421 | O95816 | P17936 | Q9P246 |
| Q15942 | O60716 | O76094 | Q01105 | Q99615 | Q16881 |
| Q9P2M7 | Q9H3U1 | O95861 | Q9H9B4 | O94760 | Q00765 |
| Q96CX2 | P18077 | P18084 | O60831 | P07203 | P52630 |
| P26447 | O96011 | Q10713 | P54852 | P08236 | Q13404 |
| O94875 | Q01105 | P52630 | Q9BR76 | P00738 | P31689 |
| Q96EK6 | Q9NZL9 | P23368 | Q15382 | P48506 | Q14315 |
| Q969X1 | Q7Z4H8 | P08243 | O95372 | Q13488 | P09661 |
| P01857 | P14209 | O60462 | Q6EMK4 | Q8WUJ3 | O00462 |
| Q0ZGT2 | P30419 | Q9Y266 | P61009 | P16083 | Q43592 |
| Q9ULZ3 | P63167 | Q8TED1 | Q93052 | Q9Y5X3 | P62857 |
| P53990 | Q00534 | Q13144 | P14866 | Q13564 | P53999 |
| Q9Y277 | Q9Y2L5 | O94875 | Q6NUQ4 | P60468 | P50479 |
| Q9Y310 | P54709 | Q5JPE7 | P52597 | Q7Z7H5 | Q9BQE5 |
| O60832 | P10909 | Q9ULZ3 | P01857 | Q16698 | Q8TCT8 |
| Q96S97 | O95197 | P54687 | Q7Z4H8 | Q6EMK4 | Q9BZQ8 |
| Q969E2 | P42345 | Q08945 | P61803 | O75828 | Q09161 |
| Q32MZ4 | P62857 | Q16774 | P46060 | Q13151 | P61201 |
| Q8WWI5 | Q8TD55 | Q9NQL2 | Q16576 | Q15005 | P78556 |
| Q01629 | Q5BJH7 | O60493 | P47712 | Q13501 | Q9Y2Q5 |
| P09543 | P15289 | P28161 | Q59GN2 | Q15435 | P60033 |
| Q71UM5 | Q93052 | P28288 | O75347 | O43236 | P24666 |
| Q96P16 | P02788 | Q68DU8 | P28845 | P30536 | Q9UHA4 |
| O75368 | P09972 | Q3LXA3 | P20908 | P53999 | Q7Z304 |
| Q86TI2 | P30626 | P21283 | P61970 | P49747 | Q13418 |
| Q9NZ32 | Q15717 | O75964 | Q92791 | Q8WUY8 | Q16822 |
| P12004 | Q6NUK1 | Q9UHB9 | Q96CX2 | O43615 | Q92882 |
| Q9BVG8 | Q8N5C6 | O00115 | Q93008 | Q8IVF2 | O15400 |
| P60468 | Q15020 | Q8IVL5 | P12004 | P60033 | O00233 |
| Q9H6T0 | P07203 | Q8NBX0 | A1X283 | P42330 | P12236 |

|        |        |        |        |        |        |
|--------|--------|--------|--------|--------|--------|
| Q9BSK0 | Q96S97 | Q9H3U7 | P23919 | P47712 | O14828 |
| Q5JNZ5 | Q14738 | Q3KQV9 | Q96IX5 | O00560 | Q13501 |
| P56192 | Q9NRW1 | Q13418 | P63220 | Q9Y4F1 | Q9Y4F1 |
| O43809 | Q9UM22 | O75955 | Q92572 | Q6VVX0 | P39687 |
| Q9Y230 | Q9Y3F4 | O14678 | P09669 | Q9Y6U3 | P52594 |
| O43592 | P08621 | P08648 | Q8NBX0 | P42766 | P62995 |
| P52630 | Q15393 | O14495 | Q9UNF1 | P62304 | Q12797 |
| Q8TCT9 | Q8TCT9 | P29992 | Q562R1 | Q5JNZ5 | Q15165 |
| Q9NRH2 | Q9H3N1 | O00483 | Q92882 | P31937 | P54619 |
| P00918 | Q96M27 | P40306 | Q13347 | P26885 | P16083 |
| Q02809 | Q5GH77 | P25786 | P36405 | P00918 | P42167 |
| P45974 | O75340 | Q6EMK4 | Q16531 | Q14192 | Q92905 |
| Q9Y232 | Q99436 | P28331 | P98066 | P61081 | P30046 |
| O43747 | P01011 | P14735 | O75351 | Q9BZV1 | P61009 |
| Q96PG2 | O75533 | Q8TCT9 | P48449 | Q13404 | Q9UH65 |
| O14828 | Q9Y277 | P42330 | Q9H0J9 | P50238 | Q9H061 |
| Q01844 | Q8NBX0 | P31930 | Q9H1C4 | O14558 | Q9Y5B9 |
| Q9Y639 | P42226 | P55145 | Q04206 | P50213 | Q9UM22 |
| P06132 | Q8IYD1 | O43252 | O95197 | Q9BQB6 | O15372 |
| Q8WTS6 | Q9UHI8 | A6NLI5 | P61587 | P09661 | P51692 |
| Q14699 | Q9Y383 | Q8WXF1 | O75116 | P09543 | P36405 |
| P31689 | Q9P246 | P47755 | O75462 | Q8TD55 | Q9Y639 |
| P49589 | Q8NEV4 | Q15041 | Q9Y3I0 | A1X283 | Q6RI45 |
| P54852 | Q9HB71 | Q13637 | Q96A26 | Q16543 | O14684 |
| P28300 | P51809 | O43681 | P23588 | P08574 | P54852 |
| Q27J81 | Q08945 | Q13103 | Q13363 | Q8TCT9 | O95479 |
| Q9UBQ7 | P16930 | O14744 | P50453 | P28300 | Q14203 |
| Q9Y3B8 | P19525 | Q66K74 | P55263 | P16615 | Q9NZW5 |
| Q9P219 | P85037 | O43592 | P00533 | P09936 | Q06033 |
| P61758 | Q5JNZ5 | Q8WYA6 | P53990 | O00186 | Q9Y2E5 |
| Q5VZ66 | O43809 | O14735 | P09661 | Q9UM54 | Q12904 |
| Q6NSZ9 | Q9Y5X3 | P54709 | Q9NTK5 | Q9BYW2 | Q7Z4H8 |
| Q92945 | Q96G01 | P62273 | Q6IBS0 | Q10472 | O43325 |
| O95084 | Q16698 | Q9NQG5 | Q66K79 | P53680 | Q9NX63 |
| Q9H3U7 | Q8N7Z5 | P19525 | P29144 | Q9P0K7 | Q9Y5M8 |
| P24844 | Q96RP9 | O75052 | Q96G03 | Q08722 | P13942 |
| O15400 | P22087 | Q53EP0 | Q9P2R7 | Q13464 | P51531 |
| Q86UE4 | O60563 | Q8TAT6 | Q14980 | Q9C002 | P28288 |
| Q93052 | Q9NYF8 | P61020 | P50479 | Q8WVM8 | Q04760 |
| O75352 | Q14232 | P54852 | Q9BZF9 | Q9NRC6 | Q9H0W9 |
| P09669 | Q92890 | Q92905 | Q04941 | O75608 | P47755 |
| Q8WUJ3 | O00622 | Q9P2R3 | Q8NCW5 | Q96A28 | O14936 |
| P28482 | O43896 | Q9BTU6 | Q15165 | Q8NBJ5 | P55145 |
| P62273 | Q59GN2 | P12081 | P08842 | P15531 | Q13103 |
| Q8N7Z5 | Q02809 | P53634 | P60468 | P27701 | Q86WV6 |
| Q15349 | Q01469 | Q8IVF2 | Q9BPX5 | Q5JRX3 | Q70UQ0 |
| Q13325 | Q9Y487 | Q7Z4H8 | Q9Y3D6 | P53990 | Q56UQ5 |
| Q9UJU6 | P55060 | P56192 | P43155 | P31431 | Q9NZB2 |
| Q86WV6 | P53680 | P31040 | Q9UIQ6 | Q9BY44 | Q8N6L1 |
| Q96FQ6 | P54852 | P14324 | P28062 | P62829 | E9PAV3 |
| P52597 | Q9BRK3 | Q16576 | Q8NCA5 | Q96C19 | Q06124 |
| Q8NA54 | Q9Y2T2 | Q9BQA1 | Q9UNW1 | P12081 | P27361 |
| Q9Y3L3 | Q5TCY1 | P55809 | Q5JNZ5 | Q14699 | Q9UIA9 |
| P02533 | P78559 | Q96KP1 | P22087 | Q9P266 | Q6UW02 |
| Q5EB52 | P53992 | P13942 | P82979 | Q5TCY1 | Q9UNL2 |
| Q8TED1 | Q9Y5M8 | Q15746 | Q92522 | P55809 | Q9NTU7 |
| Q8TDM6 | P0C0L5 | Q6RW13 | P21810 | Q8TED1 | Q66K79 |
| P30622 | Q8NDM7 | Q9H477 | Q8NBM8 | Q9UBQ0 | Q15691 |
| Q14011 | P09884 | P68036 | Q9BZK7 | Q6NSZ9 | P08236 |
| Q96PV6 | O94855 | P30043 | O75608 | Q10567 | O75923 |

|         |        |        |        |        |        |
|---------|--------|--------|--------|--------|--------|
| O94826  | P26006 | P51570 | Q9BV35 | Q9Y5M8 | P49458 |
| Q8N684  | Q92930 | Q9UPX8 | Q9NSE4 | Q96PU8 | Q14258 |
| P21283  | Q99584 | P13807 | Q96LD4 | Q9BR76 | Q8N1D5 |
| Q9UGK8  | Q92522 | P12236 | Q5TCY1 | O60641 | Q00577 |
| Q9UEU0  | Q99961 | P30566 | P48637 | P09669 | P0DOY3 |
| Q9UNA0  | P09874 | Q92974 | P61221 | O43684 | Q9P1W3 |
| Q8TF72  | P08571 | P49756 | Q02809 | Q8WZ42 | Q96T37 |
| Q8IZT6  | Q99816 | Q02809 | Q15393 | Q5VYS8 | Q14254 |
| Q9H0W5  | O14964 | Q27J81 | P54920 | Q12965 | Q15629 |
| O43617  | Q9Y2D5 | Q08209 | O95747 | Q02809 | O60749 |
| Q6ZXV5  | Q96AT9 | P61163 | Q9Y3U8 | P35659 | P20849 |
| Q96QR8  | Q8WTS6 | P55899 | Q12904 | P30837 | Q9UNZ2 |
| Q9C0C2  | P68133 | P14866 | O43617 | Q9BXJ9 | Q99638 |
| Q9H3H3  | Q7L014 | Q9H583 | Q9UBC2 | Q99594 | P10145 |
| Q9BSL1  | P13807 | P31948 | Q9P2R3 | Q06124 | Q96L93 |
| P17174  | Q15654 | Q9NY33 | P61225 | P20339 | P56962 |
| Q8WYYP3 | P26951 | Q9Y277 | O00560 | O43813 | P02649 |
| Q8WYA6  | O43865 | P28300 | P55039 | Q9NTK5 | Q8N2C7 |
| Q93008  | P55145 | O95084 | Q16204 | O14495 | O94826 |
| Q969Q0  | Q9BZF9 | P61077 | Q9H2M9 | P00846 | Q9BU19 |
| Q7Z304  | P60228 | P00915 | P11498 | O95206 | Q15717 |
| Q9P2R3  | Q9Y3E5 | Q96PU5 | O95831 | Q8IV08 | P51795 |
| Q9H4H8  | Q9UBM7 | P00492 | Q99714 | P0DPE8 | P09417 |
| P00492  | P61006 | P12004 | Q9BWM7 | Q9Y3X0 | Q9UMR2 |
| Q6NUK1  | O75608 | Q14232 | Q9HB07 | Q9Y3F4 | P08237 |
| Q9UIQ6  | Q15904 | Q9UNF0 | P34913 | Q99988 | Q96FW1 |
| P20618  | Q96G23 | Q6NUM9 | P12235 | P36776 | Q14008 |
| Q8WZ42  | Q9BXS5 | Q15393 | O75348 | Q9H3P7 | P49419 |
| Q8IUG5  | Q8TB61 | O94973 | P20618 | Q9H1K4 | Q9NZL4 |
| Q6P9B6  | Q12904 | O15400 | Q13630 | O75526 | P61587 |
| Q9NZJ7  | Q6KCF9 | Q9NZ01 | P35241 | Q92522 | O60271 |
| P08195  | Q09028 | Q86WV6 | P24666 | P35998 | Q16204 |
| P35052  | Q9ULZ3 | O75436 | Q9P246 | P13647 | O94885 |
| P16435  | Q9BTM1 | Q9UNF1 | Q68EM7 | Q13011 | Q9UNN8 |
| Q9UIA9  | Q8TBJ5 | P08559 | P30626 | Q13426 | Q14728 |
| Q13098  | Q9P2R7 | Q9NRA2 | Q13488 | Q9UJT0 | Q15746 |
| Q9UNF1  | P35613 | P84095 | Q13596 | Q9UF83 | Q8TCT9 |
| Q9Y266  | P34810 | Q8TDB6 | Q9BXS5 | P09914 | Q9Y2G5 |
| O76003  | P08574 | Q8WVM7 | P43235 | Q8TAT6 | Q08999 |
| Q8TBG4  | P35221 | O43865 | Q9UGT4 | Q14525 | Q9UI12 |
| Q9NVD7  | Q6IQ49 | Q9Y281 | O43280 | P10915 | Q9UMY4 |
| P51809  | Q9NVD7 | P43307 | Q9Y5X1 | P46779 | O43252 |
| P54132  | Q9P0J0 | O43809 | Q9Y2Z0 | Q9ULG6 | Q9BUJ2 |
| Q6WRI0  | Q5JTC6 | Q9NR12 | Q9NZL9 | Q8IVL5 | O94875 |
| Q7Z2W4  | Q96NY7 | P40616 | Q15654 | Q15382 | Q99714 |
| P54709  | Q8WZ42 | Q9UI12 | Q13114 | Q8N112 | Q96LD4 |
| Q9UM54  | Q96JJ7 | Q5W0V3 | Q6X4W1 | Q13247 | Q01844 |
| Q9BRL6  | Q9UBT2 | Q96JB5 | P26006 | P14780 | Q9ULC3 |
| Q9NVN8  | P22059 | P11831 | O60462 | P48059 | O96028 |
| P18077  | Q9BRK5 | P00491 | Q15020 | O43353 | Q9P0K7 |
| Q86T82  | P35241 | P22732 | Q9Y5P6 |        | Q14376 |
| P50238  | P39687 | Q13098 | Q6ZVZ8 |        | Q8TD55 |
| P35080  | O75935 | P17036 | Q9HAV0 |        | O43772 |
| Q86Y82  | Q8NCM8 | Q9NX40 | P61020 |        | P30520 |
| P50897  | Q71UM5 | P50897 | Q7Z4T9 |        | P36776 |
| Q8N2C7  | P46379 | Q96AX1 | O95671 |        | P00918 |
| Q16698  | P10515 | Q9UKX5 | P35637 |        | O60884 |
| Q06033  | Q8TDW7 | Q15005 | Q9UM22 |        | Q9Y2D5 |
| Q8IYW2  | Q9UJT0 | Q96D15 | Q9NX63 |        | Q9UF83 |
| Q9H2U2  | Q6VVX0 | Q10567 | Q9BRK5 |        | P52569 |

|        |        |        |        |        |
|--------|--------|--------|--------|--------|
| Q92878 | Q8WVM8 | P19823 | Q9NRW1 | Q6VVX0 |
| Q9HBM0 | Q8TF72 | Q562R1 | P30084 | P08574 |
| P27338 | P28065 | P35241 | P23368 | Q9UQE7 |
| Q9UNZ2 | Q8TC07 | Q9NSE4 | O95881 | Q16836 |
|        | P26447 | O14936 | P21283 | O76094 |
|        | Q96S52 | O15498 | Q96S97 | Q07666 |
|        | P41229 | P35573 | P17252 | Q5VZM2 |
|        | P23588 | O43615 | Q13217 | Q8NH43 |
|        | Q96AY4 | O43390 | Q9UBQ7 | P35080 |
|        | P00915 | O75351 | Q969E2 |        |
|        | O43396 | O43772 | Q9Y3Y2 |        |
|        | P06753 | Q05707 | Q14865 |        |
|        | P58005 | O75569 | P50238 |        |
|        | P01009 | Q7Z6Z7 | O94973 |        |
|        | P61421 | O75844 | Q6EEV6 |        |
|        | Q9UIA9 | O15083 | P67775 |        |
|        | P00742 | Q16647 | P31276 |        |
|        | Q8NGX0 | Q14643 | O43396 |        |
|        | Q86T82 | P56199 | Q9BS40 |        |
|        | P09661 | Q8WWP7 | Q5GLZ8 |        |
|        | P04040 | Q59GN2 | P14735 |        |
|        | Q96I99 | P22059 | Q8WZ42 |        |
|        | O75116 | O00154 | Q96PE1 |        |
|        | Q9P2R3 | P10515 | P22694 |        |
|        | Q8WWP7 | P0C0L5 | P30711 |        |
|        | P22061 | Q969X1 | Q9UHB9 |        |
|        | P50453 | Q96M27 | O95870 |        |
|        | P53801 | Q9H6K5 | Q96N67 |        |
|        | P49773 | O75935 | Q9BYW2 |        |
|        | Q96N66 | Q9BR76 | Q8NBI5 |        |
|        | C9JH25 | Q04206 | Q8TBY8 |        |
|        | O60762 | Q9NZL9 | P46379 |        |
|        | Q16822 | O15131 | Q9H583 |        |
|        | A4D0S4 | Q9ULC3 | Q96JB5 |        |
|        | A0AVT1 | Q04760 | Q12929 |        |
|        | Q9Y4W2 | Q92527 | Q9BXT8 |        |
|        |        | Q13177 | Q9H596 |        |
|        |        | P30626 | Q9ULA0 |        |
|        |        | P11717 | Q14289 |        |
|        |        | O14558 | Q01844 |        |
|        |        | P78559 | Q6NYC8 |        |
|        |        | Q13620 | P30419 |        |
|        |        | Q9UBT2 | P61421 |        |
|        |        | Q9Y4W6 | O14495 |        |
|        |        | Q8WZ42 | Q9Y639 |        |
|        |        | P28070 | Q99988 |        |
|        |        | Q9Y2R0 | Q9P289 |        |
|        |        | Q8NEU8 | P08559 |        |
|        |        | P53999 | P51692 |        |
|        |        | P01011 | Q13263 |        |
|        |        | O75145 | Q8WVM8 |        |
|        |        | Q5TCY1 | Q8NEU8 |        |
|        |        | Q9C0B1 | P09622 |        |
|        |        | Q9BRK3 | P78556 |        |
|        |        | P08581 | O00291 |        |
|        |        | Q8TDU6 | Q8TB92 |        |
|        |        | Q9UHV7 | Q96I24 |        |
|        |        | Q9H3U1 | P18077 |        |
|        |        | P20290 | Q9H3U1 |        |
|        |        | Q13488 | P42765 |        |

|        |        |
|--------|--------|
| Q95831 | Q96A65 |
| P12235 | Q6VVX0 |
| Q9UM22 | Q13304 |
| O00170 | O00622 |
| Q9HAV0 | Q9Y6B6 |
| P30533 | Q9BUJ2 |
| P54619 | Q92643 |
| O75923 | O60502 |
| P24539 | Q9Y305 |
| P82979 | P02533 |
| P10632 | Q02224 |
| Q96PU8 | Q5TGY3 |
| Q9BSK0 | Q92599 |
| Q9BRA0 | Q14165 |
| P47712 | P27708 |
| Q66K14 | P25205 |
| Q9UKK9 | Q92954 |
| Q9NUI1 | Q9Y2T2 |
| Q06055 | P15291 |
| Q00597 | O60637 |
| Q8NCA5 | Q9C099 |
| Q9Y3U8 | O60431 |
| Q9H488 | P20339 |
| Q3MIW9 | P01008 |
| P46109 | Q9BYT8 |
| P30536 | O43813 |
| Q96I99 | P43034 |
| Q6PKG0 | Q9UBQ0 |
| P01009 | P61289 |
| Q5JNZ5 | P30536 |
| Q2TAA2 | Q6P2Q9 |
| P63279 | O95202 |
| P25054 | Q8TED1 |
| Q92896 | P29536 |
| P48556 | Q15349 |
| Q5VZM2 | Q13009 |
| Q14517 | Q9Y281 |
| Q8TDB8 | Q9H3P7 |
| Q9NV70 | Q9BRA2 |
| Q9P2P6 | Q96FQ6 |
| Q9H2Y7 |        |
| P56537 |        |

| Accessory Number | C-Mean      | C-SEM       | AT-Mean     | AT-SEM      | LPS-Mean    | LPS-SEM     | LPS+AT-Mean | LPS+AT-SEM  | IL1B-Mean   | IL1B-SEM    | IL1B+AT-Mean | IL1B+AT-SEM |
|------------------|-------------|-------------|-------------|-------------|-------------|-------------|-------------|-------------|-------------|-------------|--------------|-------------|
| A0AVT1           | 7098,033333 | 421,821172  | 2411,466667 | 1238,807876 | 8131,5      | 211,692379  | 6963,933333 | 391,0483616 | 8371,333333 | 4193,296635 | 7969,366667  | 159,9451712 |
| E9PAV3           | 75161       | 13668,35897 | 28490,33333 | 15948,40695 | 73286,66667 | 21327,91924 | 68907,66667 | 8579,581387 | 45170,33333 | 22655,1765  | 11870,66667  | 11870,66667 |
| O00154           | 49874,33333 | 5140,114536 | 30711,33333 | 1003,06569  | 45900,66667 | 3370,749537 | 45730,66667 | 4485,730796 | 38176       | 3479,812687 | 37824        | 1406,800033 |
| O00159           | 1003306,667 | 9223,920593 | 855183,3333 | 12034,64628 | 763260      | 10658,65532 | 916893,3333 | 14405,93088 | 938070      | 11141,03676 | 898693,3333  | 24164,52795 |
| O00203           | 53525       | 31368,11    | 65032       | 31360,41711 | 24763,33333 | 2857,267479 | 42783       | 14676,05875 | 37324       | 10424,52495 | 22723,33333  | 1869,948336 |
| O00231           | 161393,3333 | 16850,34652 | 161320      | 5313,852965 | 191890      | 13187,41445 | 166166,6667 | 3915,819767 | 146986,6667 | 5133,401515 | 182560       | 17845,19076 |
| O00232           | 124123      | 15349,49551 | 76259,33333 | 3213,993898 | 115418,3333 | 16239,92773 | 131440      | 10302,19556 | 124456,6667 | 10442,44597 | 111869       | 15747,00144 |
| O00264           | 46640,66667 | 7058,316167 | 26835       | 7396,706857 | 44844       | 4752,758392 | 44055,33333 | 4620,12952  | 53377,66667 | 7880,060498 | 31136,33333  | 15666,69421 |
| O00299           | 362776,6667 | 45292,99149 | 350040      | 14326,61975 | 312453,3333 | 30702,35405 | 402500      | 2040,890329 | 441193,3333 | 19639,44359 | 318083,3333  | 24362,14436 |
| O00303           | 31325,66667 | 3100,590123 | 2112,033333 | 2112,033333 | 32400,66667 | 3419,293998 | 27901,33333 | 1574,493499 | 38830,33333 | 3805,617967 | 29172,33333  | 3001,154074 |
| O00410           | 65993,66667 | 11194,02344 | 23219,33333 | 898,0085993 | 67505,33333 | 2667,949358 | 45283       | 1478,028868 | 80755,66667 | 12847,22469 | 60799,66667  | 2330,898921 |
| O00442           | 58411       | 7771,741375 | 42294,33333 | 5087,356757 | 49586,33333 | 10662,76406 | 53943,66667 | 9943,950864 | 55419       | 6904,906396 | 50596,33333  | 5290,330876 |
| O00469           | 306663,3333 | 5563,363291 | 308663,3333 | 41486,01264 | 468023,3333 | 21191,82966 | 339646,6667 | 4318,31886  | 402700      | 10231,64373 | 370290       | 16429,8032  |
| O00487           | 118802,6667 | 13913,37583 | 110171,3333 | 8942,384569 | 111295,6667 | 8401,280187 | 99457       | 5020,589242 | 103567      | 11839,24163 | 116146       | 10906,64916 |
| O00571           | 283753,3333 | 65897,12799 | 186153,3333 | 11602,91103 | 204223,3333 | 11809,69846 | 242783,3333 | 3283,343486 | 321223,3333 | 69388,76862 | 199166,6667  | 20091,41221 |
| O00754           | 62609,33333 | 4681,640607 | 40642       | 9498,472877 | 58938       | 1889,079405 | 76487,33333 | 2166,195769 | 81976       | 9311,64563  | 49898,66667  | 7441,944915 |
| O14494           | 192476,6667 | 3438,300614 | 187450      | 19735,48158 | 165236,6667 | 16779,36861 | 166536,6667 | 10359,98123 | 176566,6667 | 14516,3406  | 158336,6667  | 13428,88719 |
| O14498           | 87712,93333 | 38957,91869 | 82569,66667 | 5094,63549  | 70818,33333 | 18260,78927 | 60414,66667 | 9756,355575 | 74026,66667 | 37387,60995 | 86082,33333  | 25206,44393 |
| O14558           | 115976,6667 | 6100,585582 | 89062       | 2080,715983 | 74268       | 2033,295191 | 101327      | 1429,710577 | 78068,33333 | 7276,086272 | 74283        | 5658,703856 |
| O14579           | 40082       | 2421,959193 | 36248,66667 | 2366,573989 | 33979,33333 | 5144,201018 | 32851,33333 | 1691,356983 | 38141,66667 | 2393,933049 | 36036,66667  | 2090,917608 |
| O14617           | 25202       | 1808,386297 | 19304,33333 | 1396,915928 | 13699,5     | 2679,308353 | 18254,66667 | 1851,912735 | 13715,3     | 2425,281013 | 17961,66667  | 1996,437689 |
| O14735           | 33751       | 1474,007237 | 2783,5      | 794,6826872 | 33732,33333 | 3904,722155 | 14077       | 1993,324108 | 47002,33333 | 3266,136981 | 33397,33333  | 5985,40576  |
| O14744           | 24587,66667 | 6881,900036 | 16570       | 3740,229449 | 28915,66667 | 3180,865833 | 29160,66667 | 1137,375683 | 29966,66667 | 4459,383976 | 21399,66667  | 4941,362509 |
| O14773           | 1089933,333 | 36699,33393 | 862543,3333 | 17378,3259  | 973750      | 43799,46004 | 1088100     | 26140,07141 | 979060      | 25760,9239  | 919326,6667  | 56347,56112 |
| O14818           | 147903,3333 | 11795,35549 | 138260      | 4217,250289 | 163453,3333 | 6816,705786 | 132553,3333 | 4501,445447 | 178626,6667 | 13361,25036 | 165880       | 3179,03025  |
| O14828           | 111043,2667 | 97968,83715 | 89532       | 82841,61614 | 10683       | 935,8660873 | 16673,4     | 3829,540193 | 116540,6667 | 89663,40104 | 80045,33333  | 56626,2116  |
| O14879           | 43918,66667 | 2368,16957  | 49593,33333 | 9102,094124 | 141625,6667 | 61263,59081 | 149050      | 4484,265083 | 50592,66667 | 39289,95835 | 42881,66667  | 5026,597866 |
| O14880           | 220060      | 20359,29845 | 113529,6667 | 8370,27997  | 233466,6667 | 5205,84714  | 161526,6667 | 13020,25388 | 219736,6667 | 21594,32204 | 209350       | 27788,52341 |
| O14936           | 9683,333333 | 5347,700357 | 14743,33333 | 1698,57993  | 11947,36667 | 2416,193742 | 11798,4     | 3367,877506 | 16786       | 2888,281554 | 16135,66667  | 2938,522664 |
| O14980           | 105943      | 9669,291201 | 91952       | 30709,85292 | 121053,3333 | 7692,434234 | 66781,66667 | 4342,488124 | 92094,66667 | 8565,851297 | 86511,33333  | 6738,036938 |
| O15031           | 26605       | 1485,237467 | 17037,33333 | 8170,049578 | 23584       | 2026,252781 | 17920,13333 | 6053,482685 | 26199       | 3577,174071 | 19796,33333  | 1263,811343 |
| O15118           | 142500      | 3530,169698 | 137380      | 13302,68519 | 123223,3333 | 11237,82947 | 140000      | 15768,93949 | 120933,3333 | 10434,74378 | 149633,3333  | 3083,895444 |
| O15127           | 47430,33333 | 5225,405418 | 35430,33333 | 8552,195436 | 44471       | 1315,968971 | 36656,33333 | 2891,590931 | 42992       | 3681,559995 | 43393,66667  | 9340,49596  |
| O15143           | 468290      | 22435,99117 | 471016,6667 | 19835,25173 | 488740      | 27611,42215 | 590440      | 7280,906537 | 502563,3333 | 23220,27945 | 460520       | 6505,231228 |
| O15144           | 176930      | 9872,725054 | 183546,6667 | 7796,549094 | 154813,3333 | 9774,651457 | 226170      | 10144,72441 | 225890      | 18221,9355  | 182480       | 25117,81108 |
| O15145           | 20546,66667 | 2070,494412 | 82699       | 5665,747641 | 25874,66667 | 1385,086078 | 25399,33333 | 3751,214129 | 36813       | 4212,480781 | 27572,66667  | 930,2494886 |
| O15173           | 419986,6667 | 6217,033948 | 351126,6667 | 15450,39626 | 387280      | 4897,962161 | 451006,6667 | 3418,817209 | 359986,6667 | 34164,14511 | 397843,3333  | 14915,76832 |
| O15260           | 134056,6667 | 4039,295868 | 75317       | 6045,001434 | 156420      | 8765,152594 | 122766,6667 | 13215,79905 | 135066,6667 | 7806,946337 | 155456,6667  | 14063,78604 |
| O15371           | 64321,33333 | 4277,135113 | 77262,33333 | 4953,784423 | 67744       | 6331,804587 | 66930,66667 | 1910,842775 | 73275,33333 | 5121,478638 | 64498,33333  | 3655,819577 |
| O15427           | 49139,66667 | 6286,84238  | 47031       | 3236,985171 | 74315,33333 | 10393,0014  | 62749,66667 | 12278,18828 | 49319,66667 | 11728,90399 | 73751,66667  | 19811,4336  |
| O15460           | 269220      | 16203,42659 | 234906,6667 | 9875,475235 | 383716,6667 | 9068,826336 | 320040      | 1467,389973 | 325966,6667 | 21526,71544 | 300516,6667  | 7119,977372 |
| O15511           | 305066,6667 | 28624,72727 | 344493,3333 | 35003,53189 | 268216,6667 | 22065,08655 | 312456,6667 | 15766,28928 | 238630      | 34755,07781 | 306516,6667  | 23045,30634 |
| O43143           | 42393       | 2102,308255 | 28735,33333 | 5987,472487 | 40682,33333 | 2975,289921 | 36389       | 1311,576659 | 40537       | 5992,227994 | 41913        | 4935,598478 |
| O43175           | 690846,6667 | 18962,7638  | 653506,6667 | 3601,061572 | 660663,3333 | 60693,3704  | 618583,3333 | 7506,551213 | 608983,3333 | 16301,46551 | 657736,6667  | 17492,13379 |
| O43237           | 42904,66667 | 1017,741672 | 17990,33333 | 2764,371799 | 34380       | 2725,318024 | 31501       | 2700,675903 | 33079,33333 | 2370,571333 | 33881,33333  | 3109,668864 |
| O43242           | 79434       | 12270,36821 | 43019,33333 | 6698,90681  | 74596,66667 | 2404,758639 | 53022       | 5143,385007 | 59900,33333 | 7994,088281 | 82604,66667  | 9872,350621 |
| O43286           | 24624,33333 | 1084,98254  | 22056,33333 | 3326,938334 | 33266,33333 | 2595,403779 | 33556,33333 | 4827,002532 | 24870,33333 | 594,2144207 | 31385,33333  | 4152,077766 |
| O43294           | 13628,33333 | 654,3333333 | 17754,66667 | 736,0365329 | 16631,66667 | 512,8616881 | 14934       | 1008,277905 | 12971,03333 | 4340,113943 | 14474,66667  | 2764,732255 |
| O43390           | 27653       | 3528,824308 | 35351       | 6962,54295  | 30278,33333 | 6210,432951 | 31992,33333 | 2761,88947  | 29565,33333 | 5203,2128   | 31936,66667  | 4349,120077 |
| O43399           | 160430      | 7548,986687 | 163216,6667 | 15394,01002 | 181896,6667 | 12571,31117 | 134183,3333 | 8572,864814 | 195020      | 8101,094576 | 195780       | 18066,21248 |
| O43488           | 43942,66667 | 5827,863369 | 31857       | 3266,735578 | 34293,66667 | 4745,487061 | 38589,66667 | 6505,730944 | 29893,33333 | 1130,395555 | 40666,66667  | 7205,144327 |
| O43491           | 19685,66667 | 3859,295546 | 17414,66667 | 1833,264878 | 11685,43333 | 1864,461626 | 17343,7     | 19049       | 2832,466769 | 14388,96667 | 4290,224722  |             |
| O43615           | 4229,906667 | 1754,590738 | 1909,333333 | 139,1147528 | 3685,466667 | 1885,902474 | 3982,2      | 173,1473457 | 2643,133333 | 1406,177534 | 5405,733333  | 374,8118743 |
| O43707           | 2854900     | 63355,37336 | 2602066,667 | 29570,78137 | 2606266,667 | 47997,71985 | 2560433,333 | 76360,90477 | 2523033,333 | 52413,90825 | 2670060      | 36776,26046 |
| O43747           | 54682,33333 | 3619,318367 | 40881       | 3074,012741 | 49913,66667 | 7476,086996 | 68385       | 5029,741577 | 66928,33333 | 5744,660023 | 58547,66667  | 10604,46636 |
| O43776           | 418670      | 18267,68732 | 278200      | 2907,857172 | 400343,3333 | 27486,91103 | 350300      | 9888,513538 | 557820      | 149009,0482 | 428600       | 22014,69812 |
| O43795           | 907223,3333 | 173065,7222 | 750446,6667 | 132758,0996 | 483213,3333 | 9207,332826 | 478853,3333 | 48037,14685 | 625270      | 262142,0262 | 462023,3333  | 25514,21194 |
| O43813           | 57390,66667 | 33943,88629 | 69483,66667 | 11351,93655 | 65957       | 39455,41964 | 102729      | 38305,85296 | 30346,33333 | 2239,755071 | 93488        | 28083,64181 |
| O43852           | 179226,6667 | 14089,4811  | 279666,6667 | 11523,3854  | 172916,6667 | 22841,52456 | 193026,6667 | 13473,06119 | 162926,6667 | 19618,70055 | 144300       | 16065,22953 |
| O43854           | 426630      | 10105,76238 | 420913,3333 | 2341,12034  | 304736,6667 | 3114,14158  | 405370      | 21104,55954 | 412343,3333 | 30644,51791 | 338516,6667  | 13178,50059 |
| O60493           | 426450      | 10094,8155  | 355266,6667 | 88676,31426 | 325770      | 84198,82679 | 403256,6667 | 8045,10272  | 100240,6667 | 71906,38853 | 329880       | 84299,90589 |
| O60504           | 30904,33333 | 4643,809009 | 28476       | 2243,408344 | 34296,66667 | 1352,353545 | 31717       | 2356,159233 | 29067,66667 | 3708,582763 | 28694        | 1958,655747 |
| O60506           | 276170      | 24668,77851 | 209766,6667 | 17616,71302 | 280696,6667 | 18345,846   |             |             |             |             |              |             |

|        |             |             |             |             |             |             |             |             |             |             |             |             |
|--------|-------------|-------------|-------------|-------------|-------------|-------------|-------------|-------------|-------------|-------------|-------------|-------------|
| O60547 | 393390      | 17799,73876 | 358413,3333 | 21281,04738 | 370960      | 20305,82921 | 417103,3333 | 17109,9974  | 420053,3333 | 11237,54174 | 370296,6667 | 15783,46216 |
| O60664 | 809923,3333 | 47258,51223 | 771090      | 33255,94533 | 812466,6667 | 32736,04656 | 839426,6667 | 16249,71829 | 785546,6667 | 35837,30149 | 756696,6667 | 22670,17448 |
| O60701 | 3251233,333 | 88139,38456 | 2779000     | 93935,66948 | 3033900     | 41960,45758 | 2998800     | 117015,3124 | 3144800     | 117215,8835 | 3024600     | 58896,43453 |
| O60716 | 117246,6667 | 8873,032802 | 82021       | 1759,901797 | 124301      | 13798,81279 | 126660      | 5304,124182 | 118866,6667 | 2865,247711 | 120700      | 6810,626501 |
| O60749 | 99742,33333 | 8642,131032 | 102156,6667 | 5708,13552  | 88527,66667 | 2439,809373 | 89756,66667 | 11185,00093 | 80610,33333 | 6912,464884 | 91761,33333 | 11472,28423 |
| O60763 | 207496,6667 | 40665,18959 | 180568,3333 | 86159,05207 | 107203,6667 | 9471,93557  | 98937,33333 | 5922,040592 | 129303,3333 | 11004,56319 | 105290      | 2570,998509 |
| O60784 | 27876,33333 | 1729,089581 | 16700       | 1247,125094 | 5531,333333 | 5531,333333 | 0           | 0           | 21540       | 11407,1881  | 13581       | 6919,952481 |
| O60869 | 28841,33333 | 3894,354475 | 22465,33333 | 1944,40345  | 32473       | 2999,597695 | 19498,66667 | 4137,961347 | 29446,33333 | 3068,250551 | 28987       | 4201,251044 |
| O75083 | 1276733,333 | 103430,8196 | 1108166,667 | 24078,02133 | 1177033,333 | 41653,2245  | 1237233,333 | 37118,9679  | 1226500     | 68492,50567 | 1220100     | 74502,774   |
| O75131 | 135506,6667 | 3939,485302 | 126936,6667 | 9274,233721 | 125703,3333 | 14678,22121 | 138650      | 10489,23893 | 108513,3333 | 2516,726269 | 125170      | 2031,477295 |
| O75306 | 47723       | 5496,706923 | 42387,33333 | 2220,984191 | 44749,66667 | 1448,694738 | 45586       | 8286,739065 | 41315       | 4619,548607 | 34332,33333 | 4069,377689 |
| O75340 | 30713,33333 | 15666,96641 | 26932       | 3576,096196 | 33408,66667 | 6216,860363 | 45382,33333 | 3846,635081 | 41009,66667 | 2248,239632 | 38010       | 3935,627819 |
| O75351 | 19573,66667 | 1056,354475 | 27583,66667 | 3867,283385 | 19183,33333 | 1240,940145 | 23403       | 2619,016864 | 29453,66667 | 1451,007734 | 18166,33333 | 479,9383062 |
| O75352 | 25060       | 909,1338369 | 24919       | 1634,608924 | 26539,66667 | 2736,98705  | 26671,33333 | 800,1211019 | 25770,33333 | 1936,784477 | 25869,33333 | 1343,168187 |
| O75367 | 125148,3333 | 56861,17703 | 206436,6667 | 6099,61292  | 113116      | 46702,92206 | 121696,6667 | 60891,81454 | 172263,3333 | 8935,495385 | 179420      | 11188,16041 |
| O75369 | 860800      | 79102,60362 | 795603,3333 | 54333,01217 | 831503,3333 | 48166,93345 | 721760      | 33981,38167 | 782470      | 42728,63248 | 793170      | 17802,24799 |
| O75390 | 240370      | 21226,21964 | 206506,6667 | 14594,91274 | 260370      | 5363,900944 | 200153,3333 | 5508,11926  | 245546,6667 | 12769,42355 | 226230      | 6039,118933 |
| O75396 | 366880      | 2987,992637 | 362453,3333 | 26877,51373 | 375146,6667 | 25824,30143 | 403693,3333 | 20674,77234 | 358283,3333 | 5242,764326 | 389776,6667 | 15991,85251 |
| O75436 | 61416,66667 | 3308,092922 | 3733        | 1030,631507 | 38271,66667 | 1024,937451 | 14430       | 236,9198177 | 72731,66667 | 6298,137035 | 56020,33333 | 5050,230105 |
| O75629 | 175060      | 18842,34327 | 40163,33333 | 6695,915231 | 149103,3333 | 6402,948106 | 102113      | 7638,85587  | 140693,3333 | 18602,38366 | 120116,6667 | 9083,292966 |
| O75694 | 22007,66667 | 2845,44562  | 3377        | 3377        | 10682       | 5398,660698 | 13230,33333 | 2391,90338  | 8301,666667 | 4306,67638  | 14511       | 2068,716107 |
| O75718 | 113509      | 24368,29664 | 105104,3333 | 11005,37484 | 120678,3333 | 23739,18216 | 149270      | 5260,456254 | 156293,3333 | 19880,49658 | 104660      | 22911,11785 |
| O75828 | 55047       | 5697,216426 | 40307       | 10084,43062 | 61035,66667 | 4980,196928 | 69918,66667 | 7390,044865 | 78883,33333 | 9379,132606 | 51426       | 25756,88074 |
| O75874 | 584480      | 18471,60794 | 529880      | 27330,54884 | 570726,6667 | 10075,92731 | 518430      | 23525,79931 | 533010      | 23978,11711 | 546926,6667 | 23166,33357 |
| O75915 | 4994,666667 | 4994,666667 | 93527       | 2764,211099 | 25797       | 2522,737865 | 46803,66667 | 10717,83334 | 24804,66667 | 2751,015954 | 16305,93333 | 3511,267122 |
| O75964 | 76726,33333 | 2029,693026 | 64895,33333 | 2126,230807 | 68475       | 1614,03387  | 77948,33333 | 4584,095779 | 66334       | 814,8785186 | 80195       | 2892,209920 |
| O76024 | 22768,66667 | 3259,628114 | 20682,33333 | 1212,844086 | 13756,66667 | 1404,509444 | 14129,33333 | 1207,667909 | 17026,66667 | 1721,992773 | 18634,33333 | 1463,377866 |
| O76094 | 0           | 0           | 0           | 0           | 0           | 0           | 5495,833333 | 2762,003652 | 3016,666667 | 3016,666667 | 2238,1      | 2238,1      |
| O94760 | 15018,66667 | 4505,532537 | 9791,6      | 1774,927239 | 8464,733333 | 5208,80063  | 3840        | 12865       | 7063,739543 | 14944,33333 | 1239,175846 |             |
| O94808 | 3300,766667 | 3300,766667 | 2589,733333 | 2589,733333 | 29478,66667 | 999,6514948 | 27399       | 2029,004025 | 38796,33333 | 5127,705931 | 29994,33333 | 2966,383732 |
| O94832 | 569510      | 42012,54852 | 375386,6667 | 10423,11107 | 448066,6667 | 21568,09552 | 431176,6667 | 15151,87594 | 476430      | 15026,17827 | 532910      | 30181,98801 |
| O94855 | 80092,66667 | 3557,305175 | 67619,33333 | 7434,193082 | 65562,66667 | 4087,277592 | 96515,33333 | 6350,21326  | 79941,33333 | 17327,6145  | 70195       | 4666,044042 |
| O94874 | 15820,66667 | 957,9798768 | 16336       | 1717,536317 | 16888,66667 | 1214,715513 | 24140,33333 | 1333,534193 | 19558,33333 | 1077,1698   | 18232       | 1016,547589 |
| O94875 | 38112,66667 | 758,5576957 | 42858,33333 | 3953,660175 | 26762,33333 | 1160,603914 | 34957       | 1167,234481 | 31114       | 4055,709679 | 34730,66667 | 1931,414019 |
| O94905 | 222953,3333 | 17546,19079 | 148586,6667 | 4286,281735 | 211013,3333 | 2638,827602 | 201596,6667 | 7072,609922 | 223190      | 15745,30194 | 229473,3333 | 10640,68032 |
| O94925 | 58658,33333 | 1433,365426 | 61557,33333 | 984,3756623 | 55743       | 3396,401674 | 56142,33333 | 3154,900756 | 50975,33333 | 1326,7286   | 49413       | 670,9306969 |
| O94973 | 38548,66667 | 2173,987223 | 29017,66667 | 1426,157347 | 41616,33333 | 1276,910377 | 30485       | 1931,611849 | 42097       | 4777,87676  | 36451,66667 | 697,5362197 |
| O94979 | 309920      | 7386,020579 | 349486,6667 | 19901,92816 | 334930      | 13580,96217 | 302890      | 18770,4271  | 364850      | 20111,47517 | 292376,6667 | 15730,86174 |
| O95084 | 12895       | 6977,578114 | 25915,66667 | 4776,295927 | 13044,16667 | 2137,541156 | 21572,66667 | 3016,804785 | 18448,66667 | 3725,665146 | 23608,33333 | 2007,609884 |
| O95302 | 46177       | 11100,56066 | 48054       | 2745,897728 | 64768,66667 | 10431,96513 | 78623,33333 | 16091,56583 | 43934,66667 | 7406,771999 | 43435,66667 | 3523,807616 |
| O95336 | 402346,6667 | 13658,34584 | 315253,3333 | 18259,90994 | 402213,3333 | 4704,240404 | 381556,6667 | 14482,6866  | 36773,33333 | 8685,70537  | 400430      | 7620,034996 |
| O95340 | 156539,6667 | 48896,12415 | 189536,6667 | 51662,47972 | 147460      | 11822,2629  | 151616,6667 | 32079,43543 | 184450      | 48610,69875 | 169383,3333 | 14204,18991 |
| O95373 | 34796       | 5818,762956 | 27412       | 7073,929907 | 42143,66667 | 2487,663987 | 42734,33333 | 5215,817364 | 52347,66667 | 10601,37768 | 40652,66667 | 9072,621715 |
| O95394 | 188520      | 12686,70564 | 232713,3333 | 30509,27964 | 154000      | 3525,32268  | 198050      | 7259,878328 | 210856,6667 | 9612,267047 | 169223,3333 | 6865,639891 |
| O95486 | 11647,7     | 3076,046382 | 1429,766667 | 714,8945944 | 15416       | 1796,289787 | 2165,086667 | 1006,614892 | 18585,66667 | 3890,822378 | 14279,33333 | 1703,63947  |
| O95782 | 105000      | 3342,992671 | 99767,33333 | 3949,100165 | 101872,3333 | 5795,381677 | 102089,3333 | 4776,384314 | 93890,66667 | 5369,695501 | 95924,66667 | 947,115328  |
| O95786 | 49427,33333 | 10202,60074 | 21044,06667 | 7292,638535 | 58362,66667 | 6999,159386 | 62832,66667 | 8290,078092 | 34819       | 13361,94912 | 37972,33333 | 6476,273474 |
| O95816 | 111218,3333 | 13816,00652 | 116445,3333 | 17320,61417 | 126496      | 31101,1459  | 104561      | 7857,19231  | 143946,6667 | 26805,47291 | 116903,3333 | 10232,27953 |
| O95865 | 0           | 0           | 92956       | 5848,707578 | 19982,33333 | 10852,40091 | 0           | 0           | 28364       | 28364       | 12281,2     | 9042,612324 |
| O96005 | 21373,66667 | 1069,711851 | 13678,33333 | 420,8524418 | 25837,33333 | 1618,0194   | 22185       | 1680,042956 | 19817,33333 | 2200,481791 | 23852       | 3571,792314 |
| P00338 | 2923000     | 323302,3559 | 3488866,667 | 342636,0281 | 2638433,333 | 59657,81126 | 3446700     | 192497,3073 | 3342933,333 | 22544,86884 | 3350100     | 262393,0068 |
| P00367 | 424833,3333 | 30463,08002 | 335893,3333 | 36098,16816 | 407530      | 20850,51798 | 379436,6667 | 12016,82201 | 360363,3333 | 47743,06523 | 419600      | 22671,76511 |
| P00387 | 1246000     | 41208,77738 | 1060633,333 | 6037,751605 | 1338700     | 26115,19353 | 1197966,667 | 9444,281044 | 1247833,333 | 45159,02764 | 1285333,333 | 30840,73785 |
| P00403 | 214646,6667 | 19487,45266 | 189456,6667 | 21762,45186 | 173603,3333 | 14108,89357 | 158050      | 1715,721423 | 146950      | 10494,29528 | 183460      | 22648,25232 |
| P00450 | 7341,133333 | 202,8538746 | 3306,233333 | 766,0739658 | 10658,6     | 1237,765173 | 6537,6      | 1103,450879 | 7780,6      | 607,3398637 | 5137,1      | 2584,237754 |
| P00505 | 476060      | 16925,55563 | 399376,6667 | 20603,61565 | 396666,6667 | 5098,876783 | 436013,3333 | 2884,62784  | 354100      | 17021,46096 | 421293,3333 | 2933,452649 |
| P00558 | 3306966,667 | 133824,2795 | 3957233,333 | 82827,88044 | 3565966,667 | 279587,9846 | 4134066,667 | 89269,82195 | 4358566,667 | 188514,494  | 3999166,667 | 293045,334  |
| P00568 | 855063,3333 | 53686,78339 | 614690      | 6843,283812 | 778343,3333 | 75781,63813 | 906133,3333 | 6405,784712 | 945433,3333 | 36888,14504 | 859440      | 77704,07475 |
| P00915 | 206270      | 14422,18083 | 147323,3333 | 31905,49866 | 133693,3333 | 4368,635688 | 162846,6667 | 2540430     | 3168,986869 | 940430      | 18467,43891 | 10552,44679 |
| P00918 | 37263,66667 | 5317,228643 | 43409,66667 | 87,78825535 | 34971,33333 | 4110,805125 | 28466,33333 | 2015,973655 | 37637,33333 | 2424,538329 | 34987,66667 | 6806,061057 |
| P00966 | 39889,66667 | 19974,6451  | 40527,33333 | 2370,331083 | 42211       | 4080,567648 | 54383       | 4006,719855 | 69304       | 3964,618561 | 48233,33333 | 3807,637165 |
| P01008 | 0           | 0           | 75792,66667 | 16229,31367 | 80204,66667 | 2881,021482 | 62091       | 8774,528496 | 27752,66667 | 27752,66667 | 103727,3333 | 6806,764208 |
| P01011 | 56671       | 15680,69776 | 24131,8     | 7496,69949  | 61310       | 784,0478302 | 23984       | 8071,257296 | 56992,66667 | 6699,184685 | 61253       | 2246,531623 |
| P01023 | 1859500     | 98119,17923 | 1080766,667 | 24620,20399 | 1197300     | 55955,01169 | 1680200     | 14007,49799 | 1151500     | 38991,32382 | 1149966,667 | 67282,79456 |



|        |             |             |             |             |             |             |              |             |             |             |             |              |
|--------|-------------|-------------|-------------|-------------|-------------|-------------|--------------|-------------|-------------|-------------|-------------|--------------|
| P01857 | 9855,666667 | 9855,666667 | 4257,633333 | 2324,584462 | 6630        | 613,0685959 | 1002,866667  | 1002,866667 | 5291,4      | 2664,922577 | 5024,033333 | 51,89715257  |
| P01876 | 47521,33333 | 14483,11799 | 42380,33333 | 11145,71966 | 49699       | 1242,367498 | 25197,66667  | 14935,34243 | 58695       | 11361,65905 | 130776,6667 | 7626,808711  |
| P02042 | 540223,3333 | 51075,89527 | 231910      | 7000,973742 | 366276,6667 | 6481,338168 | 299190       | 15074,69403 | 569296,6667 | 27668,16723 | 403760      | 16222,43611  |
| P02452 | 120376,6667 | 13829,71479 | 108969      | 20776,65046 | 135943,3333 | 9255,928431 | 97950,33333  | 11538,4196  | 95331,66667 | 16439,30157 | 123573,3333 | 5052,043591  |
| P02461 | 125373,3333 | 7077,128263 | 101314,3333 | 6184,08442  | 205160      | 14018,54605 | 228173,3333  | 6590,908722 | 163000      | 8347,756186 | 142433,3333 | 16063,1362   |
| P02511 | 1261566,667 | 52007,8947  | 1212033,333 | 32307,34351 | 1014693,333 | 61249,8507  | 1046400      | 14750,25424 | 929403,3333 | 19797,99008 | 1115966,667 | 15971,78067  |
| P02533 | 68615,66667 | 10741,36758 | 67385,33333 | 2559,046198 | 79002       | 3994,975511 | 74319,33333  | 4716,505109 | 52929,66667 | 9015,522435 | 56559       | 8255,601997  |
| P02545 | 4859333,333 | 124328,9499 | 5585700     | 187477,4386 | 4855733,333 | 11169,94977 | 4583766,667  | 17684,48787 | 4305966,667 | 33295,11142 | 4676166,667 | 138737,4058  |
| P02647 | 1983400     | 195627,7673 | 1434366,667 | 70742,57778 | 1393333,333 | 37547,85095 | 1391166,667  | 77135,94781 | 1831766,667 | 111665,5174 | 1700400     | 22904,65746  |
| P02751 | 153566,6667 | 26284,88307 | 207163,3333 | 27577,98176 | 217373,3333 | 36978,16578 | 242676,6667  | 3180,211384 | 193270      | 31619,30159 | 186370      | 14815,90474  |
| P02765 | 226026,6667 | 3613,628524 | 328603,3333 | 23180,17136 | 256733,3333 | 39018,88489 | 199783,3333  | 25139,70587 | 183820      | 10381,88968 | 200043,3333 | 28510,09548  |
| P02766 | 52500,33333 | 6082,25469  | 41254       | 7782,577529 | 32835       | 1377,269884 | 29667,33333  | 2234,854308 | 49357,66667 | 2844,208052 | 47949       | 5020,985063  |
| P02768 | 1335266,667 | 14888,62355 | 1860833,333 | 20190,53684 | 1053200     | 8216,446921 | 1131000      | 5398,45657  | 1206366,667 | 22937,98402 | 910290      | 18472,97215  |
| P02786 | 88489,33333 | 5297,496306 | 64524,66667 | 2529,677208 | 98444       | 10522,8014  | 82762,66667  | 1515,334543 | 91274       | 24209,82754 | 103728,6667 | 7887,674866  |
| P02792 | 395876,6667 | 39734,53759 | 313200      | 8393,648392 | 334626,6667 | 36395,75265 | 371856,6667  | 23684,30868 | 402200      | 13701,45613 | 392400      | 17291,66669  |
| P02794 | 449393,3333 | 36919,25077 | 492426,6667 | 21419,86798 | 754720      | 25815,66256 | 877083,3333  | 34361,28652 | 590510      | 16914,51448 | 648586,6667 | 24572,73647  |
| P03956 | 72641       | 4591,516779 | 63716,66667 | 1262,4276   | 104130      | 3632,428022 | 100227,3333  | 2065,839727 | 111513,3333 | 845,7212569 | 96349,33333 | 4201,772655  |
| P04004 | 636046,6667 | 31574,29141 | 720703,3333 | 16212,93962 | 743546,6667 | 8465,483513 | 618113,3333  | 32000,04497 | 696340      | 20327,87577 | 647553,3333 | 39159,14382  |
| P04062 | 240593,3333 | 8743,380989 | 234950      | 20754,43808 | 202313,3333 | 4254,379443 | 266196,6667  | 5091,854061 | 217256,6667 | 12115,76154 | 181026,6667 | 14837,95284  |
| P04066 | 35148,33333 | 3855,666494 | 38874       | 3170,184064 | 27552,66667 | 2801,811339 | 30381,66667  | 519,9116378 | 40704,33333 | 512,3743206 | 29738,33333 | 2540,737054  |
| P04075 | 3991100     | 73013,08102 | 4050133,333 | 259337,6713 | 4115500     | 74905,29576 | 3930600      | 91523,23931 | 3880966,667 | 78762,22304 | 3929866,667 | 39218,46221  |
| P04080 | 207420      | 21491,26412 | 140256,6667 | 14195,96461 | 164553,3333 | 19018,11622 | 226626,6667  | 5558,801829 | 190373,3333 | 6684,949098 | 163013,3333 | 17847,20364  |
| P04083 | 6109300     | 172953,2596 | 5410166,667 | 217164,2185 | 6030566,667 | 157582,088  | 5876900      | 132584,4259 | 6316566,667 | 75889,1809  | 5981500     | 44067,67523  |
| P04179 | 2308833,333 | 66422,74543 | 2179800     | 219768,2036 | 7578533,333 | 128783,8542 | 8330900      | 313963,6975 | 8418200     | 174954,737  | 5677400     | 177702,9638  |
| P04181 | 133763,3333 | 6029,185499 | 146483,3333 | 13347,47084 | 164146,6667 | 7646,603458 | 176130       | 815,0051125 | 216776,6667 | 21553,46711 | 162833,3333 | 17899,3597   |
| P04216 | 1670366,667 | 125717,8631 | 856100      | 53238,36336 | 971760      | 123007,834  | 1374133,333  | 22718,29904 | 1493200     | 29333,6553  | 1292600     | 159439,4033  |
| P04264 | 3810966,667 | 220178,6345 | 1681833,333 | 89192,99923 | 2104433,333 | 121001,1065 | 1638433,333  | 88662,98238 | 1521300     | 39786,97442 | 1760566,667 | 53085,88429  |
| P04271 | 2362,866667 | 2362,866667 | 1467,163333 | 699,5504566 | 3634,333333 | 3634,333333 | 0            | 0           | 16104,33333 | 1155,15213  | 8238,7      | 4402,588071  |
| P04406 | 24231000    | 492520,3887 | 24752333,33 | 482927,3007 | 25655000    | 785613,9849 | 26297333,33  | 375381,7316 | 25688666,67 | 529887,5143 | 25935000    | 3687711,2692 |
| P04439 | 256466,6667 | 13747,38319 | 275506,6667 | 34813,14231 | 386370      | 52363,64101 | 418953,3333  | 15035,87968 | 245836,6667 | 54967,68758 | 209480      | 32274,21003  |
| P04632 | 387823,3333 | 11795,54907 | 376573,3333 | 35243,91642 | 334680      | 5646,152082 | 387720       | 6477,707928 | 421513,3333 | 10669,82714 | 327403,3333 | 8657,90647   |
| P04792 | 1684966,667 | 93139,36392 | 1318900     | 56674,62689 | 1747233,333 | 56739,23784 | 1560233,333  | 45045,24886 | 1270100     | 32131,96747 | 1471466,667 | 53259,12546  |
| P04843 | 1651766,667 | 61696,20014 | 1552333,333 | 60066,22271 | 1663400     | 16003,74956 | 1830500      | 55929,09201 | 1854033,333 | 38598,1577  | 1778833,333 | 37952,79231  |
| P04844 | 531450      | 40102,05273 | 425880      | 3961,216143 | 484193,3333 | 23771,72994 | 511163,3333  | 29041,13538 | 539883,3333 | 22207,83971 | 521396,6667 | 16627,62193  |
| P04899 | 116706,6667 | 12221,02196 | 75022       | 10416,83908 | 106509,6667 | 15830,15625 | 53500,33333  | 22164,83069 | 100338,6667 | 27785,34929 | 100514,3333 | 2186,260608  |
| P05023 | 550863,3333 | 49092,46525 | 538050      | 18465,04084 | 535286,6667 | 21811,99237 | 484496,6667  | 16011,62737 | 470786,6667 | 7454,719609 | 564043,3333 | 10431,08549  |
| P05141 | 734866,6667 | 59500,22866 | 236973,3333 | 19808,27212 | 553776,6667 | 35649,62568 | 609526,6667  | 21895,35897 | 273766,6667 | 33222,34345 | 715816,6667 | 6250,904823  |
| P05161 | 54561       | 22505,77798 | 67587,33333 | 3170,665615 | 264616,6667 | 8886,576644 | 287920       | 45959,8379  | 105810      | 1649,676736 | 98586,33333 | 11385,5404   |
| P05198 | 391360      | 19419,96996 | 321530      | 13367,88066 | 402253,3333 | 11595,94805 | 347616,6667  | 18615,49653 | 394890      | 9212,189389 | 370863,3333 | 8640,046939  |
| P05362 | 166170      | 8085,041744 | 180663,3333 | 25173,49951 | 784263,3333 | 29119,85367 | 734010       | 26897,49431 | 1292533,333 | 28539,17386 | 995083,3333 | 43515,53682  |
| P05388 | 426320      | 24730,77907 | 490076,6667 | 9492,769763 | 529733,3333 | 4591,55868  | 443923,3333  | 7768,561285 | 496353,3333 | 40631,46824 | 487966,6667 | 9899,663855  |
| P05455 | 43672,66667 | 3973,095575 | 36761       | 1877,480226 | 58762,66667 | 2753,112562 | 42893,33333  | 2198,856546 | 40215       | 4278,493076 | 43959       | 2315,451864  |
| P05556 | 442236,6667 | 29399,8596  | 408083,3333 | 26708,27982 | 411670      | 26115,65112 | 429826,6667  | 12711,1976  | 449183,3333 | 25761,81433 | 417273,3333 | 13765,68237  |
| P06396 | 1813933,333 | 16081,49385 | 1884900     | 28560,63725 | 1899500     | 17140,98402 | 1704466,667  | 27330,95518 | 1955666,667 | 71234,64357 | 2096766,667 | 110277,6093  |
| P06576 | 1972966,667 | 128787,1802 | 1611700     | 69280,39646 | 1881300     | 45340,96749 | 1982533,333  | 54409,84388 | 1742200     | 103462,6664 | 1873766,667 | 57151,53347  |
| P06703 | 1153650     | 99997,03746 | 978836,6667 | 63118,62808 | 820276,6667 | 53278,83267 | 932430       | 122861,6185 | 958656,6667 | 120175,1744 | 779006,6667 | 26170,55364  |
| P06730 | 53838,33333 | 5808,665949 | 51421       | 3844,251293 | 62935,66667 | 1577,8679   | 55288,33333  | 6635,795515 | 59965,33333 | 2163,716889 | 67584,33333 | 1632,559579  |
| P06733 | 6423833,333 | 559053,9221 | 9099566,667 | 449881,6746 | 7235733,333 | 92158,81823 | 8433966,667  | 33436,6233  | 10377233,33 | 635864,7821 | 9114166,667 | 461087,7152  |
| P06737 | 660136,6667 | 22015,71737 | 484280      | 24523,34058 | 568986,6667 | 57147,46782 | 502566,6667  | 30163,2278  | 626620      | 46782,44008 | 632336,6667 | 22402,40637  |
| P06744 | 1310933,333 | 101616,9332 | 1339966,667 | 11920,47725 | 1245900     | 53657,18343 | 1288900      | 40935,59983 | 1400133,333 | 32946,4886  | 1433133,333 | 44907,547    |
| P06748 | 254990      | 19878,73822 | 297380      | 9877,334323 | 204183,3333 | 24039,48442 | 256280       | 25145,79952 | 288553,3333 | 5409,825423 | 212056,6667 | 17408,53271  |
| P06753 | 185883,3333 | 7342,13033  | 72414       | 1985,515298 | 178696,6667 | 9314,321112 | 51003,33333  | 25509,77593 | 204353,3333 | 25657,06552 | 207733,3333 | 22594,83151  |
| P06756 | 228963,3333 | 7479,274326 | 253176,6667 | 24969,10113 | 223376,6667 | 7786,596033 | 226490       | 14088,40067 | 253226,6667 | 30710,6574  | 229266,6667 | 10682,84814  |
| P06865 | 569253,3333 | 56119,03727 | 454566,6667 | 24857,51686 | 494670      | 18625,21946 | 558113,3333  | 51351,27922 | 514923,3333 | 19961,48152 | 502776,6667 | 13542,90507  |
| P07093 | 1462433,333 | 124986,8838 | 884870      | 49304,5052  | 1330766,667 | 18705,19833 | 1124733,333  | 20875,37092 | 1125333,333 | 39127,19997 | 1327433,333 | 106532,1913  |
| P07099 | 490620      | 38070,89571 | 457656,6667 | 21908,71846 | 407466,6667 | 36894,19753 | 488750       | 22061,1     | 422380      | 24838,22122 | 437433,3333 | 38051,26469  |
| P07195 | 2147633,333 | 129069,6754 | 2060500     | 80878,07696 | 2069666,667 | 40079,43501 | 2260566,667  | 89696,04847 | 1812100     | 87754,71497 | 2112900     | 9242,474416  |
| P07203 | 84101,33333 | 8611,862174 | 85419,66667 | 6726,850733 | 86585       | 11218,70181 | 106813,3333  | 2583,862311 | 93113       | 8120,382565 | 98006       | 9594,737846  |
| P07237 | 3148533,333 | 124857,9771 | 2957033,333 | 76997,7561  | 4175700     | 62209,99384 | 3431166,667  | 90687,4731  | 3779166,667 | 236638,0804 | 3447466,667 | 127244,3494  |
| P07305 | 307663,3333 | 39637,62705 | 301606,6667 | 9803,924951 | 281236,6667 | 5587,621239 | 351643,3333  | 17409,2785  | 303290      | 23725,69704 | 308650      | 24958,92426  |
| P07339 | 7445466,667 | 108944,7923 | 6800800     | 50709,20364 | 6402566,667 | 79482,5837  | 7034266,667  | 87113,99301 | 5644433,333 | 166652,076  | 6304066,667 | 111542,538   |
| P07355 | 15686000    | 458504,4529 | 12957000    | 380142,0787 | 15222333,33 | 318547,3975 | 13171666,667 | 248204,4408 | 14466000    | 124831,887  | 15297333,33 | 403415,5564  |
| P07384 | 215766,6667 | 16240,29385 | 142650      | 6507,741544 | 192590      | 26624,13942 | 215920       | 6972,065691 | 209146,6667 | 22109,54721 | 219070      | 7262,155327  |
| P07437 | 17935       |             |             |             |             |             |              |             |             |             |             |              |

|        |             |              |              |             |             |             |              |             |             |              |              |             |
|--------|-------------|--------------|--------------|-------------|-------------|-------------|--------------|-------------|-------------|--------------|--------------|-------------|
| P07602 | 298686,6667 | 19235,70407  | 262603,3333  | 3739,350805 | 222783,3333 | 3364,601677 | 277926,6667  | 1514,70936  | 287993,3333 | 8801,386886  | 269196,6667  | 16625,44369 |
| P07686 | 827613,3333 | 38110,80089  | 900880       | 35980,20428 | 774066,6667 | 78262,01214 | 908673,3333  | 42466,45042 | 797560      | 16538,81797  | 790680       | 34333,40793 |
| P07737 | 1913233,333 | 40360,30778  | 2044000      | 56712,25617 | 1879633,333 | 84122,31835 | 2140300      | 58425,19434 | 2026633,333 | 89954,77259  | 1817100      | 71700,02324 |
| P07741 | 207610      | 15297,94213  | 204440       | 7147,883137 | 208116,6667 | 18766,08318 | 194373,3333  | 3284,033766 | 191863,3333 | 5109,254131  | 207416,6667  | 12164,88434 |
| P07814 | 623113,3333 | 14026,72727  | 674326,6667  | 34014,53431 | 619753,3333 | 8914,056939 | 542500       | 19557,36264 | 571430      | 10187,23221  | 629316,6667  | 14596,3264  |
| P07858 | 903030      | 30184,08411  | 854310       | 31697,36898 | 816813,3333 | 7906,331499 | 830683,3333  | 11749,48557 | 770843,3333 | 21491,38225  | 745446,6667  | 24652,40038 |
| P07900 | 3477233,333 | 217858,6876  | 2893300      | 48818,98538 | 3376166,667 | 92170,30131 | 4177600      | 81836,56477 | 3809333,333 | 106226,9478  | 3668066,667  | 49418,76612 |
| P07910 | 283360      | 2622,899159  | 371940       | 6654,068931 | 315660      | 7392,282011 | 287066,6667  | 3092,120811 | 225643,3333 | 47058,12375  | 266666,6667  | 34333,21634 |
| P07996 | 633480      | 17912,65754  | 694123,3333  | 33078,39291 | 534743,3333 | 32687,01288 | 527530       | 22322,17731 | 461890      | 35695,58843  | 585620       | 3007,457398 |
| P08123 | 42833,33333 | 3405,382472  | 46411,66667  | 4416,076174 | 44489,46667 | 19070,85405 | 34448,66667  | 10620,55627 | 41778,66667 | 2987,475765  | 43946,66667  | 6889,512932 |
| P08133 | 2710300     | 63404,02195  | 2062000      | 40048,34578 | 2359933,333 | 53318,98765 | 2354466,667  | 74415,7764  | 2570233,333 | 34594,42794  | 2483600      | 46061,51684 |
| P08134 | 503226,6667 | 17124,07889  | 377253,3333  | 13229,35163 | 508996,6667 | 25643,48932 | 444873,3333  | 8879,807305 | 518526,6667 | 7967,940623  | 546620       | 14612,24258 |
| P08195 | 55684,66667 | 5310,929308  | 39827        | 1951,197581 | 63273,33333 | 12183,32525 | 49599        | 791,2597551 | 56002       | 5653,6523    | 53475,66667  | 1650,864656 |
| P08237 | 20352,66667 | 2672,382291  | 14314        | 454,2877209 | 10287,66667 | 5158,815896 | 14481,33333  | 1711,740472 | 15952       | 8354,295362  | 17814,33333  | 2499,430491 |
| P08238 | 2808533,333 | 1144003,3674 | 2552033,333  | 89383,18882 | 2640600     | 32688,07122 | 3427500      | 50612,15269 | 3254933,333 | 53525,26921  | 2851233,333  | 104500,2764 |
| P08254 | 325220      | 46840,63016  | 375533,3333  | 20468,5371  | 1007390     | 21526,55802 | 882153,3333  | 11601,10962 | 1589900     | 41091,2805   | 1344066,667  | 33264,6125  |
| P08294 | 29015,66667 | 1655,736728  | 17342,66667  | 10748,27219 | 21972,33333 | 6669,471177 | 48673,33333  | 9055,657464 | 24878,66667 | 2821,302851  | 32267,33333  | 12822,60406 |
| P08493 | 336686,6667 | 25378,79189  | 585750       | 12317,93949 | 367240      | 3487,276875 | 327056,6667  | 3747,445056 | 550973,3333 | 15446,64401  | 503866,6667  | 9011,223249 |
| P08582 | 63416,66667 | 26714,89453  | 49204        | 14182,41197 | 62406,66667 | 9071,643022 | 49630,46667  | 20430,40216 | 75023,66667 | 21378,3291   | 88690        | 15241,77684 |
| P08621 | 50037       | 3346,212336  | 54498,66667  | 1090,77531  | 52679,33333 | 4209,241196 | 56945,33333  | 3713,144056 | 56071       | 313,8455034  | 59830,66667  | 5191,430417 |
| P08631 | 27105       | 4936,704299  | 14290        | 3252,041871 | 29701,66667 | 1645,44192  | 12632,66667  | 7155,856001 | 34813       | 2644,207443  | 27532,66667  | 4177,198197 |
| P08648 | 152623,3333 | 9294,301719  | 89668,33333  | 17426,33551 | 111326,6667 | 4417,12702  | 126436,6667  | 3252,098468 | 125746,6667 | 11495,70403  | 96147,66667  | 8253,426264 |
| P08670 | 13510000    | 285773,2201  | 48085666,67  | 630482,4431 | 25877000    | 397273,6253 | 10807333,333 | 89614,60694 | 10780666,67 | 1212516,9274 | 16980333,333 | 487135,2767 |
| P08708 | 29786,33333 | 3078,305396  | 32697        | 1381,747203 | 39001,33333 | 1648,720143 | 31015,33333  | 846,0757124 | 26112,66667 | 3792,878517  | 38896        | 6438,90001  |
| P08758 | 14441000    | 442520,4327  | 11606333,333 | 350181,0643 | 14388666,67 | 410692,2341 | 13755000     | 172461,5899 | 13737000    | 104096,1094  | 13782666,67  | 227736,934  |
| P08865 | 1227733,333 | 45549,47249  | 1000900      | 82367,12532 | 1197033,333 | 24087,7101  | 1324000      | 11027,39014 | 1404233,333 | 64268,35233  | 1217233,333  | 2833,921508 |
| P09012 | 73132,66667 | 26826,15978  | 20448,66667  | 10230,31789 | 32776,33333 | 19893,99164 | 57085,33333  | 30695,94602 | 41262,33333 | 13486,58356  | 80069,66667  | 8224,939338 |
| P09211 | 915136,6667 | 31949,51347  | 723336,6667  | 11576,19732 | 852093,3333 | 28009,05826 | 690800       | 35418,76951 | 912220      | 19347,09539  | 826716,6667  | 31052,18475 |
| P09382 | 2865133,333 | 127414,6817  | 2472300      | 73314,82342 | 2597000     | 27912,0643  | 3097633,333  | 2611900     | 32242,36344 | 2447700      | 64610,55125  | 247700      |
| P09417 | 66715,33333 | 2517,26686   | 62585,66667  | 6904,017003 | 54769       | 5543,078206 | 75700,66667  | 1546,342064 | 60745,66667 | 5517,623714  | 64840,66667  | 6923,728194 |
| P09429 | 208749,6667 | 75034,78096  | 252396,6667  | 8341,497334 | 195306,6667 | 17753,5286  | 263593,3333  | 25178,97094 | 294076,6667 | 38947,8991   | 237970       | 16455,23321 |
| P09493 | 181101      | 82938,26821  | 183141,6667  | 81776,93951 | 182748,3333 | 77972,51259 | 250653,3333  | 26163,32951 | 179858      | 107962,3443  | 140435,3333  | 63487,21379 |
| P09525 | 270996,6667 | 19237,09293  | 255260       | 16547,07326 | 200380      | 3180,005241 | 306190       | 5792,417457 | 260533,3333 | 11741,21563  | 246180       | 19111,98926 |
| P09543 | 26234       | 4455,074672  | 22986,33333  | 1761,68029  | 33712,66667 | 11067,93316 | 28975,33333  | 3517,614548 | 13487       | 1453,322171  | 26009,33333  | 1348,964335 |
| P09601 | 469980      | 13046,08115  | 339060       | 17231,61919 | 566186,6667 | 27453,11417 | 505546,6667  | 19444,01565 | 454270      | 31803,406    | 520163,3333  | 28733,92903 |
| P09619 | 19233,33333 | 2154,537408  | 17746,33333  | 1749,123241 | 9845        | 1331,238897 | 13222,66667  | 1649,246528 | 12441,33333 | 404,2789191  | 16343,33333  | 638,1873636 |
| P09622 | 18658,56667 | 4532,484343  | 21675,66667  | 2645,865223 | 20538       | 1334,788747 | 2270,481618  | 19848       | 1599,84343  | 24249        | 4684,365628  |             |
| P09651 | 262996,6667 | 18768,25896  | 268206,6667  | 17132,55802 | 316133,3333 | 33956,14148 | 336873,3333  | 22901,09629 | 332823,3333 | 21166,73517  | 300450       | 17469,60885 |
| P09661 | 27837       | 1302,532533  | 21444        | 733,7910693 | 31726       | 2578,562843 | 27719,66667  | 1948,787429 | 25357       | 3459,942774  | 28590        | 3919,38724  |
| P09913 | 44545,33333 | 12734,73029  | 22159,66667  | 7525,647621 | 101400,3333 | 11574,22078 | 1471713,3333 | 3604,44787  | 62087,66667 | 2118,256388  | 35751,33333  | 11525,02486 |
| P09914 | 280643,3333 | 18363,62558  | 327186,6667  | 73994,92265 | 725773,3333 | 37274,04876 | 715070       | 60009,8928  | 462106,6667 | 30117,84429  | 363930       | 17371,58695 |
| P09936 | 191370      | 20777,02898  | 170146,6667  | 21887,83249 | 104062      | 41261,43402 | 192993,3333  | 8642,677697 | 209776,6667 | 27173,80867  | 156696,6667  | 21188,7866  |
| P09960 | 22065,33333 | 11282,90522  | 47091,33333  | 5904,68428  | 40086,66667 | 4046,491498 | 34851        | 2663,262348 | 50846,66667 | 9003,731566  | 47396,33333  | 4566,542249 |
| P0DMV9 | 2433133,333 | 39823,62504  | 2369166,667  | 107073,7026 | 2573300     | 197869,0055 | 2750866,667  | 66193,21046 | 2858733,333 | 121271,8342  | 2861366,667  | 53663,52993 |
| P10155 | 132249,1    | 63347,04927  | 155683,3333  | 6101,749294 | 147646,6667 | 4245,94447  | 192383,3333  | 9034,840588 | 51145,66667 | 29943,10463  | 145149       | 52030,43383 |
| P10253 | 438740      | 1816,214011  | 648633,3333  | 155616,057  | 430903,3333 | 25644,86715 | 571976,6667  | 17444,10725 | 400666,6667 | 34860,331    | 473030       | 22820,89467 |
| P10301 | 7399        | 7399         | 0            | 29411,33333 | 1460,66427  | 26288,33333 | 2034,582376  | 21226       | 2030,759792 | 14150        | 7350,982043  |             |
| P10599 | 469350      | 20073,74488  | 694970       | 40797,9881  | 489863,3333 | 41395,1629  | 495960       | 41362,07321 | 473863,3333 | 21909,83214  | 489933,3333  | 16690,07123 |
| P10619 | 460480      | 26755,88969  | 403013,3333  | 10555,48094 | 391713,3333 | 12184,1883  | 393470       | 19316,81133 | 343780      | 18283,84624  | 377940       | 19233,6606  |
| P10620 | 111873,3333 | 1126,089596  | 109693,3333  | 7794,105322 | 106594,3333 | 9416,549905 | 118380       | 4445,518342 | 109594,6667 | 6067,296634  | 127273,3333  | 12110,04037 |
| P10644 | 106800,3333 | 17854,57831  | 108129       | 8176,841138 | 133786,6667 | 4998,567573 | 90568        | 9706,484637 | 89762,66667 | 8399,456259  | 128717       | 15737,96807 |
| P10768 | 280766,6667 | 30942,8141   | 302410       | 9208,872533 | 254640      | 30939,91004 | 298576,6667  | 7497,057941 | 309020      | 11595,28496  | 291526,6667  | 5883,520299 |
| P10809 | 1421700     | 50978,16526  | 1031556,667  | 148830,6248 | 1265466,667 | 57011,96755 | 946006,6667  | 97394,20488 | 982686,6667 | 274951,5459  | 1285900      | 57446,35178 |
| P10909 | 22579       | 11580,27134  | 44547,66667  | 1224,702186 | 25581       | 12879,66991 | 7429,333333  | 7429,333333 | 11404,66667 | 11404,66667  | 29276        | 2909,886653 |
| P10915 | 151983,3333 | 10990,60255  | 101021,6667  | 9472,543909 | 118943,3333 | 8931,622349 | 109760       | 3673,69478  | 144500      | 13847,89274  | 129433,3333  | 1357,37901  |
| P11021 | 3938700     | 47545,03129  | 4273000      | 122372,6004 | 4704000     | 54870,96986 | 4914366,667  | 47462,34765 | 4857300     | 64588,72451  | 433683,333   | 67027,11723 |
| P11117 | 85633,66667 | 12989,16249  | 62516        | 2900,553453 | 64424,66667 | 2927,160987 | 66927,66667  | 4547,503137 | 76235       | 13928,26293  | 73862        | 7574,906754 |
| P11142 | 1560833,333 | 158969,2877  | 1303866,667  | 92117,17779 | 1661700     | 57051,90619 | 1539300      | 75057,04497 | 1327200     | 37350,41276  | 1513700      | 112204,1146 |
| P11166 | 39075,33333 | 359,4080009  | 39659,33333  | 9382,006543 | 68431,33333 | 5617,394928 | 54396        | 3875,376928 | 96893,33333 | 9875,498862  | 72537,66667  | 5080,858764 |
| P11177 | 87293       | 6346,653685  | 40035,33333  | 9369,560543 | 62398,66667 | 20132,99826 | 43805,33333  | 11299,75266 | 38102       | 11122,48832  | 46935,33333  | 9809,755252 |
| P11216 | 1503733,333 | 37838,31098  | 935590       | 30792,01412 | 1257633,333 | 83984,44962 | 1327266,667  | 14335,19368 | 1414633,333 | 47055,29844  | 1365966,667  | 72330,1305  |
| P11233 | 45618       | 1828,786574  | 44212,66667  | 3148,400935 | 32221,33333 | 4162,991286 | 40630,33333  | 3725,490229 | 51505       | 6108,289477  | 38205,66667  | 2862,507894 |
| P11279 | 1154100     | 40411,67323  | 959380       | 24859,4898  | 812210      | 22575,60926 | 1142366,667  | 127150,4926 | 846843,3333 | 48821,01198  | 814550       | 18354,65064 |
| P11310 | 22740,66667 | 2441,027948  | 1216,29      | 260,6991109 | 20542       |             |              |             |             |              |              |             |

|        |              |             |             |             |             |             |             |             |             |             |             |             |
|--------|--------------|-------------|-------------|-------------|-------------|-------------|-------------|-------------|-------------|-------------|-------------|-------------|
| P11413 | 217186,6667  | 10026,20954 | 146933,3333 | 10695,84707 | 225673,3333 | 11694,70013 | 179240      | 11445,81292 | 166943,3333 | 3155,526017 | 210823,3333 | 11801,71927 |
| P11498 | 194266,6667  | 21071,43274 | 174556,6667 | 15504,17184 | 193460      | 7865,629875 | 184523,3333 | 11961,48031 | 166630      | 17894,8745  | 196373,3333 | 10254,58326 |
| P11586 | 66456,33333  | 376,6963115 | 71890,33333 | 2035,974323 | 70239,66667 | 2586,768533 | 70279,33333 | 1858,632143 | 68822       | 4143,618266 | 69549,66667 | 4932,537289 |
| P11717 | 86077,33333  | 5159,165964 | 52139,66667 | 6844,427084 | 63224,66667 | 9792,797563 | 61311,33333 | 7554,08034  | 51052       | 7463,363764 | 70278       | 14039,41496 |
| P11766 | 107877,6667  | 22006,61989 | 103012,6667 | 9575,786849 | 105261,6667 | 3603,24892  | 99183       | 1575,862409 | 119220      | 10166,72186 | 107870      | 997,8476838 |
| P11940 | 1058376,6667 | 84366,14138 | 814573,3333 | 49662,29634 | 1037606,667 | 84754,94112 | 1121533,333 | 17240,68186 | 1122733,333 | 36246,57838 | 1017833,333 | 66446,21146 |
| P12109 | 851210       | 31294,95806 | 1149500     | 20665,02682 | 919810      | 47747,1678  | 986030      | 9517,280774 | 724413,3333 | 16137,43199 | 916920      | 13610,22427 |
| P12110 | 711440       | 44566,59399 | 1001143,333 | 33276,64663 | 737230      | 12010,9006  | 806423,3333 | 14187,37036 | 654200      | 35538,83697 | 743466,6667 | 34739,37072 |
| P12111 | 1500866,667  | 117422,6317 | 1860200     | 23301,7882  | 1702166,667 | 44350,36014 | 1696533,333 | 44675,88213 | 1359800     | 96105,56696 | 1643066,667 | 27745,83052 |
| P12236 | 134763,3333  | 17918,25171 | 123740      | 11772,23995 | 135250      | 11634,2354  | 130243,3333 | 12848,20264 | 158356,6667 | 2437,993255 | 152836,6667 | 20474,96059 |
| P12268 | 91799        | 5120,418375 | 93259,33333 | 1770,647935 | 96686       | 5167,567061 | 95631,33333 | 6537,554725 | 103126,3333 | 8252,83043  | 98694       | 14847,89601 |
| P12277 | 99715,66667  | 11806,54531 | 84924,66667 | 3916,163102 | 87063,66667 | 8816,427779 | 44946,66667 | 23528,9682  | 49544       | 27381,98444 | 68874       | 5519,679912 |
| P12814 | 1442333,333  | 43433,33333 | 1307700     | 32309,28659 | 1300433,333 | 76210,28656 | 1370133,333 | 4200,925824 | 1309433,333 | 34960,80345 | 1359366,667 | 51889,7014  |
| P12955 | 374306,6667  | 8341,201619 | 339873,3333 | 20146,45158 | 354943,3333 | 11560,68097 | 356723,3333 | 29871,02517 | 330823,3333 | 9338,273098 | 379170      | 20161,92782 |
| P12956 | 396563,3333  | 20033,92983 | 314003,3333 | 4198,834494 | 385940      | 5408,866178 | 321553,3333 | 11097,49271 | 395796,6667 | 36060,52197 | 406400      | 17175,59897 |
| P13010 | 158383,3333  | 11902,96368 | 165120      | 8828,104742 | 144753,3333 | 21078,96608 | 170063,3333 | 16792,28427 | 143650      | 19221,33277 | 176190      | 15228,71958 |
| P13073 | 66525,33333  | 8855,027241 | 58229,33333 | 4217,062537 | 48993,33333 | 5169,630462 | 83195,66667 | 4943,055072 | 66153,66667 | 3470,528026 | 59727,66667 | 9202,207422 |
| P13473 | 1087000      | 37557,55583 | 882910      | 10912,32331 | 812096,6667 | 67513,18793 | 799636,6667 | 35438,58647 | 681403,3333 | 69934,83165 | 786513,3333 | 36849,18015 |
| P13489 | 644576,6667  | 45638,16763 | 596356,6667 | 7521,977429 | 624820      | 34379,37221 | 537373,3333 | 27429,30327 | 534070      | 47349,31291 | 563113,3333 | 20569,91033 |
| P13639 | 3659000      | 146795,1748 | 3861066,667 | 80183,33853 | 4294400     | 75434,23184 | 4194433,333 | 74636,68297 | 4117700     | 39973,6163  | 4289300     | 70871,99729 |
| P13645 | 392816,6667  | 30457,8202  | 220513,3333 | 4094,745956 | 232393,3333 | 7616,93362  | 254776,6667 | 10005,35246 | 226303,3333 | 19492,9768  | 278413,3333 | 23760,50388 |
| P13667 | 620673,3333  | 12925,35794 | 605036,6667 | 22864,90348 | 688350      | 22125,7369  | 744890      | 14412,14418 | 720693,3333 | 23262,38189 | 674850      | 19315,07788 |
| P13674 | 558873,3333  | 12932,14385 | 538133,3333 | 14620,90892 | 686900      | 50314,8656  | 575753,3333 | 6692,658499 | 598933,3333 | 35263,35224 | 564663,3333 | 29076,33306 |
| P13716 | 75169,33333  | 1616,641099 | 65655,66667 | 6109,621656 | 72140,33333 | 6015,399248 | 64979,33333 | 2998,681507 | 67741,33333 | 4947,325012 | 73290,66667 | 1001,858329 |
| P13797 | 959086,6667  | 21940,0671  | 975190      | 9417,336849 | 929720      | 16262,14008 | 949770      | 10466,52442 | 1031553,333 | 36294,4281  | 981386,6667 | 8147,482911 |
| P13798 | 63688,66667  | 5156,118706 | 68277       | 3545,921084 | 48220,66667 | 12867,16045 | 70186       | 5612,645039 | 61722,33333 | 8313,864431 | 62528,66667 | 3445,508058 |
| P13804 | 80546        | 5469,980164 | 62193,66667 | 4324,599455 | 75118       | 7851,87502  | 61363,33333 | 1157,679048 | 80212,33333 | 3071,258392 | 75943       | 1994,885646 |
| P13807 | 49458,66667  | 4240,11487  | 42812,66667 | 1793,036283 | 34761,33333 | 2217,275906 | 44275,66667 | 2738,872903 | 46342,66667 | 4932,625715 | 42321,33333 | 6403,401839 |
| P13861 | 45709,33333  | 1309,109918 | 49826       | 3751,864381 | 34759,33333 | 1622,89467  | 62250,66667 | 3669,748962 | 44723,33333 | 1785,252208 | 34107       | 2001,203971 |
| P14174 | 1627666,667  | 118534,6269 | 1892966,667 | 119091,3702 | 1668333,333 | 86716,80601 | 1897566,667 | 40478,07363 | 1920100     | 115178,6583 | 1927533,333 | 101271,5217 |
| P14314 | 113296       | 12588,98286 | 127620      | 11480,48054 | 146206,6667 | 8342,670103 | 155606,6667 | 5381,233853 | 126070      | 11664,3231  | 119260      | 2327,108363 |
| P14324 | 33586,66667  | 3694,900194 | 45810       | 1381,212873 | 42984,33333 | 5126,831944 | 2692,312657 | 38451,66667 | 2251,840161 | 48049,33333 | 3651,02955  |             |
| P14550 | 131136,6667  | 6622,5205   | 165246,6667 | 9328,959094 | 158880      | 7595,887045 | 154703,3333 | 7241,006683 | 153373,3333 | 7464,463217 | 149020      | 6127,53077  |
| P14555 | 43374        | 7288,530739 | 69791,66667 | 6618,477426 | 59259,33333 | 12975,8729  | 39380       | 7757,037257 | 48598,33333 | 2977,858981 | 70581       | 14811,59488 |
| P14618 | 1674033,333  | 681572,7727 | 1751133,333 | 275877,5896 | 1593066,667 | 172742,9047 | 1846633,333 | 260124,5428 | 1755033,333 | 54703,2398  | 17888000    | 236553,0244 |
| P14625 | 6215500      | 233595,5693 | 6429100     | 84638,13167 | 7192466,667 | 96159,69934 | 7485700     | 200269,3769 | 7397800     | 75671,02043 | 6881033,333 | 147721,5887 |
| P14678 | 72240        | 36215,81975 | 15425,66667 | 1025,997455 | 0           | 0           | 29620       | 0           | 0           | 0           | 58546,66667 |             |
| P14868 | 277336,6667  | 19033,61267 | 281116,6667 | 25918,51355 | 274956,6667 | 14317,73531 | 371520      | 18077,88797 | 282156,6667 | 8512,21149  | 355830      | 11287,11212 |
| P15121 | 528036,6667  | 34624,35864 | 564063,3333 | 18813,04896 | 628143,3333 | 19795,47451 | 807790      | 11308,32584 | 752213,3333 | 21089,25266 | 686853,3333 | 19075,15079 |
| P15144 | 469436,6667  | 15559,54727 | 412330      | 21665,86332 | 415443,3333 | 7702,141116 | 578166,6667 | 17484,01778 | 484873,3333 | 22646,02271 | 416630      | 8016,017299 |
| P15311 | 126623,3333  | 11386,78523 | 112033,6667 | 12952,74476 | 102479      | 15614,55958 | 110816      | 20010,91326 | 132140      | 7102,396309 | 109323,3333 | 5462,909278 |
| P15531 | 8776,333333  | 8776,333333 | 32923       | 7505,249119 | 2869,6      | 2869,6      | 25056       | 1107,844905 | 33889,33333 | 708,6560833 | 24636,33333 | 2146,747178 |
| P15559 | 710690       | 17345,46723 | 450433,3333 | 6419,959328 | 507506,6667 | 19304,00419 | 581660      | 14458,99835 | 550103,3333 | 7927,993301 | 552313,3333 | 31618,6471  |
| P15586 | 55643,66667  | 4562,781035 | 61755       | 3608,217335 | 52388,33333 | 6609,224421 | 60241       | 5096,286131 | 63962       | 3582,355975 | 57143,66667 | 7804,853198 |
| P15848 | 146353,3333  | 13792,33765 | 113879,3333 | 15955,55203 | 113489,3333 | 16245,25388 | 137583,3333 | 2070,477669 | 120603,3333 | 11045,94244 | 146916,6667 | 5649,915437 |
| P15880 | 445560       | 42844,10383 | 439686,6667 | 26830,29403 | 554050      | 12355,90142 | 605753,3333 | 28741,59897 | 562006,6667 | 22037,8238  | 561663,3333 | 6645,836625 |
| P16070 | 534860       | 40585,15164 | 390406,6667 | 24034,22305 | 774016,6667 | 18125,37479 | 705650      | 87964,39981 | 631720      | 20391,33476 | 559743,3333 | 25500,10087 |
| P16112 | 45117        | 2100,820395 | 50784,66667 | 1106,305764 | 49125,33333 | 5892,752903 | 41029,33333 | 3709,319135 | 55032       | 4490,290117 | 43452       | 252,3945324 |
| P16152 | 224053,3333  | 25188,11514 | 211270      | 17103,3106  | 261253,3333 | 10747,3878  | 188150      | 28815,85038 | 174573,3333 | 18042,14449 | 168370      | 19945,57846 |
| P16278 | 220666,6667  | 39645,21044 | 194206,6667 | 22441,5963  | 174450      | 18408,26264 | 233793,3333 | 46123,80959 | 188326,6667 | 10527,64667 | 178000      | 20453,31513 |
| P16401 | 529056,6667  | 24536,85006 | 575790      | 15745,09553 | 452503,3333 | 29114,40957 | 533703,3333 | 19142,57239 | 463520      | 8860,118509 | 471160      | 6372,129419 |
| P16403 | 636356,6667  | 19425,66716 | 747046,6667 | 27356,95179 | 529686,6667 | 11396,01441 | 656353,3333 | 10876,74175 | 666466,6667 | 34413,03258 | 708226,6667 | 11687,03032 |
| P16615 | 15997        | 9983,29877  | 18145       | 3454,714605 | 25314,33333 | 7935,386933 | 28802,33333 | 5910,700645 | 15088       | 2425,049759 | 22031,66667 | 4181,851157 |
| P16930 | 100464,3333  | 14231,16295 | 101619,3333 | 15456,02158 | 99757,33333 | 4701,511471 | 90985,33333 | 3493,68885  | 98569,66667 | 12283,83893 | 94660       | 5252,088473 |
| P17050 | 27976,33333  | 1055,001159 | 29480       | 2065,166902 | 29344       | 4221,476558 | 25025,33333 | 12598,77891 | 29863,66667 | 2384,62585  | 20970,66667 | 10746,80117 |
| P17174 | 63335,66667  | 1788,688564 | 48345,66667 | 5194,659319 | 66403,66667 | 4809,496382 | 48423,66667 | 2426,469337 | 54383,33333 | 11997,50094 | 57425,33333 | 3753,022619 |
| P17405 | 151166,6667  | 3940,289047 | 121186,6667 | 6424,070188 | 131410      | 7049,191443 | 112796,3333 | 25221,44993 | 92560,66667 | 28887,25002 | 134710      | 16120,34222 |
| P17655 | 263106,6667  | 104229,6264 | 347670      | 54362,30404 | 300713,3333 | 63861,70118 | 431536,6667 | 3294,664036 | 233536,6667 | 97205,64684 | 359310      | 13200,76134 |
| P17844 | 78545,33333  | 9681,119655 | 57475,66667 | 2874,978976 | 80841       | 772,5971352 | 72192,33333 | 1313,036219 | 64680,66667 | 1557,874014 | 69365,33333 | 6934,887222 |
| P17858 | 105190,3333  | 3489,270713 | 74046,33333 | 11013,62369 | 109202,6667 | 7727,649952 | 95211       | 8321,505813 | 111643,3333 | 1725,440362 | 92060,33333 | 9229,142473 |
| P17931 | 1638300      | 25901,6087  | 1663033,333 | 10083,70523 | 1689933,333 | 22803,24051 | 1694866,667 | 18499,75976 | 1769100     | 38179,88126 | 1717633,333 | 64364,4398  |
| P17980 | 49730,33333  | 4708,886717 | 69729       | 7277,07471  | 43942,66667 | 3528,585426 | 55356,66667 | 6436,03041  | 83356,66667 | 6266,56132  | 46149,33333 | 4848,488745 |
| P17987 | 518716,6667  | 6911,855355 | 494900      | 36032,53021 | 401630      | 30987,04622 | 492393,3333 | 14818,44834 | 469346,6667 | 34788,9371  | 464443,3333 | 17503,04958 |
| P18084 | 40216        | 11329,50009 | 31809       | 996,155777  |             |             |             |             |             |             |             |             |

|        |             |             |             |             |             |             |             |             |             |             |             |              |
|--------|-------------|-------------|-------------|-------------|-------------|-------------|-------------|-------------|-------------|-------------|-------------|--------------|
| P18085 | 269970      | 18594,84875 | 279443,3333 | 25138,08023 | 241430      | 3026,455573 | 299466,6667 | 4443,235808 | 346106,6667 | 14247,52181 | 281136,6667 | 19064,60711  |
| P18124 | 622706,6667 | 49783,24562 | 691243,3333 | 54218,2707  | 688876,6667 | 32163,8339  | 702450      | 35107,83578 | 653180      | 59089,98985 | 656496,6667 | 25016,01643  |
| P18206 | 3151366,667 | 101360,6487 | 2871566,667 | 107160,8811 | 2602233,333 | 167103,9231 | 2713833,333 | 59473,98124 | 2765633,333 | 182952,7201 | 2556733,333 | 58822,48247  |
| P18621 | 235740      | 6300,341261 | 271290      | 10771,87232 | 289796,6667 | 16786,77687 | 236753,3333 | 2222,658568 | 289536,6667 | 10382,60939 | 271606,6667 | 4844,382772  |
| P18669 | 1153100     | 35384,88378 | 1122400     | 29895,87485 | 936476,6667 | 46273,22708 | 1257900     | 29090,43371 | 1178866,667 | 17405,01205 | 1047940     | 45111,01418  |
| P19105 | 136037      | 128648,6276 | 154896,6667 | 154896,6667 | 0           | 0           | 0           | 161263,3333 | 161263,3333 | 137740      | 137740      | 137740       |
| P19320 | 185960      | 8174,945464 | 197073,3333 | 17131,16588 | 451246,6667 | 8688,736643 | 402670      | 6395,16484  | 318220      | 4386,277845 | 269073,3333 | 12333,99413  |
| P19338 | 1725433,333 | 26184,55864 | 1755866,667 | 15414,96387 | 1773500     | 32050,58502 | 1920866,667 | 44514,3173  | 1937133,333 | 18340,51375 | 1842233,333 | 21432,24466  |
| P19367 | 451500      | 30795,25342 | 452546,6667 | 22496,27549 | 459240      | 32108,70443 | 543893,3333 | 10018,65149 | 509893,3333 | 9634,629094 | 493863,3333 | 32838,54307  |
| P19525 | 17607,33333 | 8819,2612   | 15981,66667 | 8514,173327 | 7713        | 7713        | 11083       | 7964,982883 | 25522,66667 | 2023,120554 | 9369,366667 | 2172,371362  |
| P19623 | 313703,3333 | 53126,51891 | 128883,3333 | 17509,02275 | 212206,6667 | 24517,46679 | 179650      | 10409,22828 | 157763,3333 | 9254,31491  | 209573,3333 | 6893,514666  |
| P19971 | 170436,6667 | 3705,007123 | 151733,3333 | 7295,05388  | 361920      | 20936,76272 | 420926,6667 | 7423,658876 | 277910      | 6090,462489 | 203316,6667 | 12246,2543   |
| P20042 | 76328,66667 | 8389,983042 | 65806,66667 | 6858,310247 | 25948,66667 | 25948,66667 | 25659,66667 | 25659,66667 | 63119,33333 | 15129,32682 | 50666,66667 | 3292,789108  |
| P20073 | 132386,6667 | 4762,385023 | 201593,3333 | 14013,76744 | 128223,3333 | 4354,784087 | 164896,6667 | 9315,578947 | 140426,6667 | 7113,84175  | 130648,6667 | 19209,59053  |
| P20339 | 48494,33333 | 25849,95934 | 81196       | 5608,53433  | 74726,66667 | 10150,1181  | 79109,33333 | 5853,504373 | 85291,66667 | 16610,85999 | 75926,33333 | 6328,044783  |
| P20591 | 414790      | 26860,35741 | 205860      | 36791,639   | 1472866,667 | 35416,96078 | 1603633,333 | 16381,12057 | 748236,6667 | 23152,89495 | 520640      | 48073,18483  |
| P20742 | 130806,6667 | 12442,54842 | 67373,66667 | 6845,183376 | 81056,66667 | 530,6211245 | 95620,33333 | 9399,440415 | 78886,66667 | 3825,622927 | 77807,66667 | 6603,259204  |
| P20810 | 15796,33333 | 1082,931874 | 14301,33333 | 1773,829129 | 22812,33333 | 2143,038056 | 14837,33333 | 2266,351424 | 12729,33333 | 885,1237829 | 51654       | 37543,23484  |
| P21266 | 273273,3333 | 25363,39773 | 217313,3333 | 44872,2135  | 213036,6667 | 6672,821326 | 285316,6667 | 7395,794601 | 272760      | 43583,10032 | 302943,3333 | 12926,6989   |
| P21281 | 116356,6667 | 721,6724403 | 102394      | 5921,690412 | 146933,3333 | 6555,873533 | 140180      | 8662,045563 | 100941,3333 | 9470,0194   | 108173,3333 | 3226,754475  |
| P21283 | 6072,4      | 1139,545779 | 7386,766667 | 1017,141238 | 4204,866667 | 1119,225834 | 5432,9      | 1249,488945 | 3907,9      | 1139,657011 | 3771        | 1077,127209  |
| P21291 | 104101,3333 | 8428,290798 | 117056,6667 | 5412,314149 | 80591,66667 | 11702,08449 | 93252       | 4381,711119 | 99734,66667 | 4514,489721 | 83392,66667 | 12911,433323 |
| P21333 | 6340266,667 | 262459,9673 | 6047766,667 | 59591,31182 | 5560100     | 52267,517   | 6050766,667 | 167672,8594 | 5943666,667 | 197971,297  | 6022133,333 | 144136,8948  |
| P21399 | 44049       | 2639,158389 | 35527,66667 | 1095,640655 | 41193       | 1036,780755 | 37604,33333 | 1883,57323  | 50317,33333 | 2813,101511 | 55106       | 3271,884218  |
| P21589 | 2980266,667 | 74824,33502 | 2782133,333 | 38539,43147 | 2667233,333 | 18081,88166 | 3005300     | 29617,95627 | 2818666,667 | 94589,734   | 2691166,667 | 68759,90434  |
| P21796 | 663733,3333 | 103436,9577 | 412776,6667 | 112465,998  | 358130      | 69371,66496 | 523636,6667 | 44098,61915 | 338600      | 68403,72212 | 518720      | 34328,79307  |
| P21926 | 78051,66667 | 5396,347695 | 70067       | 7121,757672 | 67719,33333 | 7340,087655 | 71243,33333 | 3632,145937 | 68252,66667 | 8208,217211 | 72202,66667 | 4345,275762  |
| P21964 | 106719      | 9322,624148 | 58638       | 7757,74368  | 132166,6667 | 10636,47237 | 83283,66667 | 7817,253254 | 100171      | 4329,500472 | 92514,33333 | 11417,75314  |
| P21980 | 777370      | 54472,03074 | 883186,6667 | 53927,53172 | 800083,3333 | 28380,62504 | 797656,6667 | 3689,156784 | 842043,3333 | 14092,50904 | 866416,6667 | 36212,58544  |
| P22061 | 242736,6667 | 22234,77557 | 259986,6667 | 18181,42856 | 274283,3333 | 5852,550251 | 257903,3333 | 16818,15025 | 258360      | 13212,14214 | 258270      | 30017,03239  |
| P22102 | 194396,6667 | 4014,396315 | 161626,6667 | 38632,08957 | 181770      | 4576,596261 | 211486,6667 | 10737,9457  | 196516,6667 | 2827,344651 | 216120      | 20786,34407  |
| P22234 | 117544,6667 | 9180,35993  | 130493,3333 | 16242,97421 | 123620,3333 | 19915,30107 | 128486,6667 | 6136,232105 | 126173,3333 | 3508,320269 | 110713,3333 | 3459,139264  |
| P22307 | 96425,33333 | 8137,391522 | 79949       | 3647,312572 | 86964,33333 | 3674,350252 | 100226,3333 | 2216,605237 | 93135       | 14406,65646 | 92107,33333 | 8494,851789  |
| P22314 | 1715866,667 | 113568,912  | 1522033,333 | 113480,0472 | 1717833,333 | 148977,4181 | 1630300     | 159350,3059 | 2025133,333 | 117759,1516 | 1971500     | 86476,37442  |
| P22392 | 304200      | 24275,91605 | 196513,3333 | 11813,93574 | 289290      | 19450,86716 | 302836,6667 | 6564,32107  | 371526,6667 | 3287,898687 | 300060      | 24673,37499  |
| P22413 | 144060      | 17447,86902 | 85251       | 2945,696692 | 108790      | 3874,687084 | 92207       | 3115,273075 | 134913,3333 | 5181,77683  | 122916,6667 | 5481,746478  |
| P22626 | 48914,66667 | 6304,953405 | 48358       | 6990,774373 | 40182,33333 | 5180,835593 | 33922,66667 | 2741,07183  | 53527,33333 | 1838,321819 | 47911       | 5397,929819  |
| P22694 | 45735       | 5878,828653 | 20536,66667 | 842,0689468 | 31203,66667 | 2621,331998 | 22844       | 3358,046506 | 27843,33333 | 1502,461351 | 33877       | 3087,787288  |
| P22695 | 41054,66667 | 4316,443765 | 34419,66667 | 3433,243429 | 42363       | 6369,036531 | 35208,66667 | 2989,685677 | 28111,66667 | 1985,93759  | 33821,33333 | 4231,88021   |
| P23141 | 7580,666667 | 3804,592853 | 4876        | 2439,648205 | 9396        | 5137,938011 | 10718,33333 | 1102,526996 | 8572,666667 | 4422,478805 | 8370,7      | 2331,612987  |
| P23246 | 229486,6667 | 7246,850657 | 207003,3333 | 6979,040845 | 249303,3333 | 8408,197059 | 280713,3333 | 11444,42999 | 275893,3333 | 45993,17425 | 268380      | 29659,83873  |
| P23284 | 3741000     | 133786,1851 | 3350066,667 | 72487,38588 | 4178433,333 | 40284,58487 | 4174966,667 | 107588,3565 | 3869166,667 | 97250,67838 | 3625533,333 | 57841,31549  |
| P23381 | 347836,6667 | 2293,36967  | 232660      | 15808,67589 | 470600      | 44836,53904 | 436740      | 60819,50866 | 484383,3333 | 67711,62808 | 375143,3333 | 38575,997    |
| P23396 | 1055100     | 19622,77588 | 898816,6667 | 40483,04021 | 966550      | 29048,6368  | 1059900     | 20553,66958 | 1086200     | 32550,62723 | 1087866,667 | 19246,32721  |
| P23526 | 497970      | 58773,47956 | 479793,3333 | 13001,73365 | 515933,3333 | 37133,52768 | 396650      | 20491,6544  | 388473,3333 | 38427,41917 | 486476,6667 | 22472,11334  |
| P23528 | 253336,6667 | 11220,13716 | 222586,6667 | 24566,87766 | 225790      | 13099,04704 | 209506,6667 | 21646,72441 | 256073,3333 | 24397,23026 | 261436,6667 | 21557,8055   |
| P23634 | 36823,33333 | 5629,547771 | 40234,33333 | 2347,594253 | 44124,66667 | 4269,510446 | 41048       | 493,4676619 | 35632,33333 | 7859,302351 | 36607,66667 | 2711,721614  |
| P24390 | 43317,66667 | 4102,901304 | 9546,033333 | 653,4672405 | 29079       | 2959,436264 | 18414,33333 | 2989,660869 | 38074,33333 | 5877,045356 | 45804,66667 | 5640,206921  |
| P24534 | 58774       | 3750,102043 | 86985,33333 | 8726,045923 | 68898,33333 | 4222,008106 | 86241,33333 | 7754,971961 | 49422,33333 | 25886,94339 | 57968       | 2614,831607  |
| P24539 | 118639,3333 | 10648,76583 | 111673,3333 | 7453,411598 | 118826,6667 | 4045,673958 | 107460      | 3848,016805 | 111066,6667 | 11200,45882 | 126686,6667 | 3353,691167  |
| P24752 | 128250      | 21920,58926 | 93649,33333 | 3541,746572 | 112763,3333 | 2760,219395 | 97392       | 4497,008339 | 133363,3333 | 13510,86641 | 109942,6667 | 9842,917612  |
| P24821 | 3201666,667 | 43397,47817 | 4146966,667 | 115666,7243 | 2980300     | 47359,47635 | 3104866,667 | 36675,89278 | 2349900     | 73434,52866 | 3409266,667 | 31169,55423  |
| P25398 | 60205       | 7512,804692 | 42859,66667 | 3518,192828 | 57274,33333 | 7987,481963 | 38149,33333 | 3022,34745  | 54979,33333 | 3405,341115 | 55286,33333 | 6467,535655  |
| P25705 | 2359700     | 21634,30917 | 2059933,333 | 42872,69268 | 2167400     | 71266,35485 | 2150566,667 | 72800,28236 | 2058433,333 | 42708,16992 | 2303566,667 | 61032,89641  |
| P25786 | 591580      | 32435,21389 | 430320      | 12599,38226 | 587713,3333 | 65373,46922 | 667086,6667 | 3331,77797  | 665953,3333 | 15694,75956 | 570836,6667 | 57882,71513  |
| P25787 | 119623,3333 | 16649,98532 | 96523,66667 | 5413,074491 | 127716,6667 | 7427,045921 | 107420      | 1396,889401 | 95294       | 16510,77434 | 90006       | 20902,40589  |
| P25788 | 86024       | 14857,12978 | 123090      | 3521,320775 | 115980      | 1075,546373 | 105369,3333 | 13791,87033 | 88374,33333 | 8674,780772 | 105166,3333 | 15466,79618  |
| P25789 | 204986,6667 | 15369,0385  | 148036,6667 | 5412,363419 | 205373,3333 | 7135,351739 | 234310      | 9497,411928 | 189486,6667 | 14558,49046 | 189496,6667 | 24440,67261  |
| P26022 | 114020      | 68514,4576  | 42819,33333 | 6776,562706 | 107919      | 9945,412728 | 119020      | 23179,66667 | 23179,66667 | 4785,192171 | 59578,33333 | 23762,24232  |
| P26038 | 915770      | 28774,29466 | 910180      | 43682,33167 | 863003,3333 | 3444,320607 | 979203,3333 | 28973,07505 | 879440      | 79534,65241 | 875053,3333 | 3254,844253  |
| P26196 | 65692,33333 | 7238,166765 | 63571       | 1365,695549 | 57774,33333 | 4680,66713  | 62081,33333 | 8268,636976 | 54135       | 2049,903168 | 63101       | 6236,931644  |
| P26368 | 29328,66667 | 6565,671566 | 35483,66667 | 1007,282538 | 30551,33333 | 8120,706175 | 37440,33333 | 2775,731635 | 49238,66667 | 2276,238588 | 32861,66667 | 9883,428493  |
| P26373 | 350773,3333 | 25316,59162 | 461356,6667 | 15022,62331 | 390300      | 11275,31079 | 458510      | 19236,51043 | 365960      | 6007,506416 | 435943,3333 | 17332,93717  |
| P26599 |             |             |             |             |             |             |             |             |             |             |             |              |

|        |             |             |             |              |             |             |             |             |             |             |             |             |
|--------|-------------|-------------|-------------|--------------|-------------|-------------|-------------|-------------|-------------|-------------|-------------|-------------|
| P26639 | 177753,3333 | 8322,480266 | 84018,66667 | 30255,06094  | 156990      | 4274,798241 | 136506,6667 | 5056,950113 | 148323,3333 | 10481,84197 | 138810      | 7031,318037 |
| P26640 | 303636,6667 | 27614,17168 | 308616,6667 | 3556,544828  | 258186,6667 | 15437,81324 | 313496,6667 | 6893,21486  | 297143,3333 | 14222,71931 | 298300      | 18459,94854 |
| P26641 | 1269566,667 | 27954,98365 | 1056933,333 | 10162,07547  | 1468433,333 | 56682,78202 | 1396833,333 | 15568,59374 | 1453266,667 | 41671,42639 | 1360266,667 | 40120,5406  |
| P26885 | 123793,3333 | 8436,542209 | 107330      | 3219,767072  | 127403      | 19187,81538 | 122576,6667 | 5006,85641  | 143520      | 14478,97441 | 148363,3333 | 20130,54092 |
| P27105 | 1847733,333 | 163915,9981 | 1806100     | 145151,7941  | 1345700     | 10281,21264 | 2164600     | 73192,82752 | 1583233,333 | 68876,34653 | 1475866,667 | 85109,1913  |
| P27144 | 0           | 0           | 0           | 0            | 0           | 0           | 0           | 0           | 0           | 0           | 42476,66667 | 42476,66667 |
| P27338 | 21631,33333 | 2728,383547 | 24506,33333 | 2783,944105  | 36438,66667 | 484,076555  | 24470,33333 | 830,4649969 | 19275       | 2426,28138  | 19229,96667 | 5281,641658 |
| P27348 | 403143,3333 | 2974,202041 | 434060      | 26510,53187  | 402650      | 22908,27798 | 391623,3333 | 18638,16366 | 417716,6667 | 9619,879302 | 358600      | 11089,49653 |
| P27361 | 63613,33333 | 6191,088793 | 51994       | 6316,854782  | 56841,33333 | 2229,624507 | 57961,66667 | 2823,237936 | 60952,66667 | 3307,954168 | 60044,33333 | 1580,422447 |
| P27487 | 103859,3333 | 16076,1459  | 37307,13333 | 14222,83215  | 79779,66667 | 5336,588559 | 61461,33333 | 3907,872069 | 75934       | 5718,429242 | 68997,66667 | 2803,709349 |
| P27658 | 195180      | 31339,0337  | 95092       | 5021,933194  | 161430      | 11051,4539  | 149633,3333 | 7731,938811 | 114833,3333 | 4970,011178 | 167116,6667 | 14352,54952 |
| P27695 | 280920      | 32748,05694 | 227056,6667 | 44298,57798  | 291326,6667 | 89346,6814  | 296503,3333 | 55487,82639 | 258360      | 52452,26624 | 218853,3333 | 46541,32226 |
| P27701 | 12984,73333 | 4006,308368 | 18469,66667 | 4714,449078  | 19810,63333 | 5656,360043 | 16769       | 1473,66923  | 19870,66667 | 2344,157726 | 12551       | 829,8531999 |
| P27708 | 23436       | 2513,318391 | 31716,66667 | 822,6310095  | 15533,66667 | 2739,921187 | 21481,66667 | 1542,660941 | 16993,66667 | 3110,631786 | 24909,33333 | 1880,556773 |
| P27797 | 770660      | 21393,78492 | 769730      | 33376,01384  | 870646,6667 | 36660,43341 | 916653,3333 | 31709,59967 | 896100      | 62316,65133 | 761943,3333 | 14258,12322 |
| P27816 | 136286,6667 | 2847,655956 | 107404,6667 | 5521,539198  | 97531       | 3851,294631 | 151463,3333 | 5271,10467  | 145910      | 5241,949383 | 109477,6667 | 14700,9361  |
| P27824 | 297760      | 1669,520889 | 356146,6667 | 29099,04027  | 345496,6667 | 8357,655838 | 364010      | 21786,74903 | 391906,6667 | 12548,65243 | 347240      | 14288,71933 |
| P28065 | 25151,13333 | 10003,53884 | 37251       | 5450,996147  | 34828       | 5287,906044 | 35367,66667 | 4841,015917 | 30376,33333 | 3900,978097 | 29942,66667 | 685,0163826 |
| P28066 | 49728       | 8767,973673 | 30575,33333 | 3411,231563  | 58375       | 4484,729014 | 48837,33333 | 19165,4306  | 72791       | 5885,669291 | 51533       | 8151,297586 |
| P28070 | 83325       | 9055,964167 | 88628,33333 | 7408,236505  | 116003,3333 | 4538,095538 | 92441,66667 | 9879,343911 | 87107       | 10473,68049 | 82980       | 2246,016208 |
| P28074 | 50047,66667 | 6064,199159 | 57512       | 5411,797206  | 34180,66667 | 660,5029229 | 57159,66667 | 3329,898113 | 50184,33333 | 3304,020699 | 55221,33333 | 6305,605584 |
| P28161 | 22134       | 3517,7182   | 17200,33333 | 527,9306562  | 26380       | 1372,873993 | 19724,33333 | 1375,403618 | 28961,66667 | 33376,33333 | 2798,817866 | 23439,33333 |
| P28288 | 21545       | 3300,597572 | 7786,5      | 726,8029811  | 22289,33333 | 406,7351035 | 16916       | 21966       | 695,267095  | 19095       | 1037,465341 |             |
| P28838 | 226450      | 13194,21464 | 181376,6667 | 9577,533317  | 442626,6667 | 7756,524852 | 446173,3333 | 7643,189416 | 277713,3333 | 19954,30892 | 220276,6667 | 2189,713325 |
| P28845 | 11909,33333 | 11909,33333 | 1225,266667 | 1225,266667  | 35015,66667 | 2008,231422 | 10084,9     | 992,8170073 | 39667,33333 | 2952,998721 | 15724,66667 | 8451,755189 |
| P29144 | 76134,66667 | 4121,530474 | 59382,66667 | 1008,089006  | 58164,66667 | 2361,554385 | 67519       | 1710,500609 | 60395,66667 | 2728,29045  | 70281       | 4708,996319 |
| P29218 | 141870      | 4976,025857 | 127183,3333 | 3693,423585  | 134536,6667 | 12663,98086 | 121156,6667 | 3973,790522 | 102358      | 34531,45895 | 122850      | 11436,33391 |
| P29279 | 0           | 0           | 35506,66667 | 2038,568316  | 39390       | 5691,968142 | 0           | 0           | 24951,66667 | 13143,13933 | 21417,66667 | 14899,37343 |
| P29401 | 1640233,333 | 58995,40472 | 1577433,333 | 128265,8221  | 1453433,333 | 29714,32502 | 1557366,667 | 19212,87184 | 1507933,333 | 89646,01373 | 1604100     | 107154,5146 |
| P29590 | 30071       | 4681,179481 | 27442,33333 | 1194,055601  | 39509,66667 | 5451,973965 | 37078       | 2481,308526 | 40055       | 5799,899511 | 32815,33333 | 3815,019543 |
| P29692 | 516410      | 34485,17121 | 486516,6667 | 54199,769306 | 514953,3333 | 20135,30261 | 529293,3333 | 549896,6667 | 15293,90983 | 18469,90104 | 566110      | 42249,61657 |
| P29966 | 11987       | 6001,11598  | 11035,66667 | 5531,074649  | 13451,66667 | 445,865949  | 16304,66667 | 1755,559392 | 9519,666667 | 5333,159237 | 4852,333333 | 4852,333333 |
| P30040 | 82698       | 3595,571165 | 66482       | 4918,68397   | 95165,66667 | 9448,050175 | 85629,33333 | 4980,866469 | 70167       | 6128,987763 | 69526,66667 | 5789,985646 |
| P30041 | 2100833,333 | 135712,9364 | 2118566,667 | 48505,20018  | 2189766,667 | 109513,4137 | 1919300     | 136040,2269 | 2033033,333 | 107697,4208 | 2229700     | 8868,107652 |
| P30043 | 74199,66667 | 8861,604827 | 44424,33333 | 2628,461168  | 67732,66667 | 5419,408865 | 54426,33333 | 3818,782892 | 85558       | 4013,951212 | 55681       | 361,3488619 |
| P30044 | 647230      | 10026,13751 | 671730      | 3604,4602    | 574000      | 9667,317794 | 679283,3333 | 23014,98159 | 744723,3333 | 21349,92766 | 668920      | 27969,53879 |
| P30046 | 70481       | 3108,123925 | 64232,66667 | 2357,778498  | 51141       | 7557,022099 | 54816       | 3315,777033 | 59557,66667 | 1657,576176 | 55097       | 2098,674423 |
| P30048 | 383926,6667 | 20498,82951 | 318313,3333 | 23076,17627  | 327733,3333 | 16998,4081  | 381960      | 8670,711236 | 312546,6667 | 30839,29222 | 357103,3333 | 14600,51293 |
| P30050 | 243040      | 2589,459403 | 164686,6667 | 11063,53219  | 229316,6667 | 16113,69431 | 241726,6667 | 12156,29649 | 248623,3333 | 21193,65655 | 251656,6667 | 9196,325957 |
| P30084 | 123417      | 46855,97296 | 147166,6667 | 2828,576399  | 179406,6667 | 9332,399358 | 98499,66667 | 36161,92948 | 182800      | 1602,342036 | 161316,6667 | 14508,8586  |
| P30085 | 32820       | 4736,577492 | 6762,7      | 801,0056325  | 32218       | 1679,342232 | 17382,33333 | 3368,777094 | 32625       | 5695,802753 | 32621,33333 | 2548,221886 |
| P30086 | 1380200     | 24318,10025 | 1466233,333 | 52704,21657  | 1294933,333 | 35773,70018 | 1306300     | 38759,94496 | 1540966,667 | 99834,81913 | 1372033,333 | 38912,60864 |
| P30101 | 4054333,333 | 115255,1132 | 3966433,333 | 140541,8364  | 4545733,333 | 83187,52577 | 5052933,333 | 67706,53177 | 4883466,667 | 52736,27257 | 3979966,667 | 83544,80501 |
| P30153 | 137290      | 8677,6168   | 148820      | 13357,74307  | 170123,3333 | 10022,0712  | 143973,3333 | 8586,045526 | 154793,3333 | 14490,73305 | 135383,3333 | 7148,977394 |
| P30419 | 58363       | 24346,21907 | 67001       | 4194,91168   | 75943       | 1920,516597 | 84062,66667 | 1791,520986 | 64699       | 11505,80333 | 46823,66667 | 14555,39715 |
| P30479 | 48318       | 2767,223157 | 45056       | 6243,47438   | 77829       | 7526,09941  | 86965,33333 | 6473,574704 | 57732       | 5192,047412 | 59433,66667 | 3088,860434 |
| P30520 | 41258       | 24562,19539 | 33357,33333 | 3929,245404  | 29228,66667 | 5082,418858 | 52405,33333 | 21214,16056 | 23490       | 3207,954229 | 29991,66667 | 6456,18082  |
| P30566 | 19153       | 1543,378113 | 15542,66667 | 3026,734012  | 15482,33333 | 673,1838118 | 16561,33333 | 553,7455292 | 16846       | 789,6659631 | 16425       | 411,9381021 |
| P30740 | 83565       | 5592,776859 | 65773       | 3128,501079  | 73478,66667 | 3829,01316  | 84965       | 4239,880226 | 78434,33333 | 3410,546209 | 83429,66667 | 2565,314882 |
| P30837 | 44529,33333 | 3324,096385 | 22686,66667 | 2191,717845  | 45596       | 6843,475506 | 47796,66667 | 1960,770795 | 53533,33333 | 7674,31129  | 44958       | 9208,501633 |
| P31040 | 39475       | 4575,654817 | 0           | 0            | 20144,13333 | 5703,958212 | 38950,33333 | 5205,85572  | 7876,666667 | 7876,666667 | 20008       | 10017,1581  |
| P31153 | 113999,3333 | 16662,43521 | 98983,33333 | 3799,159264  | 91689,66667 | 5593,263518 | 108741,6667 | 9426,973858 | 114043,3333 | 4783,528451 | 91916,66667 | 8889,881558 |
| P31689 | 30420,66667 | 2396,320258 | 24612,33333 | 4115,788354  | 20165,33333 | 10530,75175 | 67550,66667 | 6922,070267 | 38689,33333 | 19725,45136 | 14472,66667 | 7286,946899 |
| P31749 | 17986,66667 | 2159,911212 | 18750,5     | 8596,883927  | 11214,66667 | 348,6136034 | 8555,033333 | 447,9622355 | 8974,3      | 821,3941462 | 25675,56667 | 8541,698203 |
| P31937 | 44723       | 12993,44254 | 28941,33333 | 2697,116753  | 36877,66667 | 12950,19298 | 39493       | 3404,750407 | 28219,33333 | 6285,900369 | 34807,33333 | 2921,862439 |
| P31939 | 586606,6667 | 64936,68001 | 443503,3333 | 9026,192134  | 663870      | 60723,23635 | 584736,6667 | 57664,37385 | 711196,6667 | 43027,86165 | 530180      | 12931,39333 |
| P31943 | 288763,3333 | 29739,44761 | 314130      | 2854,63366   | 307096,6667 | 17592,25714 | 340306,6667 | 11863,31928 | 289993,3333 | 18358,5696  | 305576,6667 | 29230,87485 |
| P31946 | 358570      | 60181,16095 | 349286,6667 | 10510,21937  | 256550      | 15068,71704 | 296756,6667 | 50969,62538 | 303986,6667 | 41319,24343 | 277210      | 54439,29463 |
| P31948 | 101711,6667 | 23292,89454 | 106944,3333 | 16665,37893  | 87360,66667 | 6978,970347 | 93189,33333 | 8677,182652 | 91439,33333 | 13130,75222 | 76402,66667 | 6112,328098 |
| P31949 | 131443,3333 | 17309,78176 | 74894,66667 | 5377,320595  | 147633,3333 | 7173,928104 | 73101       | 6602,724766 | 107337,6667 | 12363,09854 | 93784,66667 | 13894,40547 |
| P32119 | 1207266,667 | 14565,52246 | 1184300     | 37248,13194  | 1037313,333 | 37937,99561 | 1140433,333 | 19961,15672 | 1291700     | 19174,5491  | 1218133,333 | 41610,98947 |
| P32455 | 51763       | 7136,782562 | 17269       | 1437,001856  | 51764,66667 | 6206,131117 | 33531,33333 | 1572,018059 | 50412       | 7938,31294  | 50819       | 3216,982282 |
| P32969 | 21359       | 4717,873497 | 23042,66667 | 2595,518595  | 26945,66667 | 2882,914979 | 16965,66667 | 5433,207228 | 25287       | 2756,525047 | 23113,33333 | 4445,316124 |
| P33176 | 198756,6667 | 22528,89725 | 182466,6667 | 11736,36277  | 202393,3333 | 18621,65884 | 169403,3333 | 8818,084322 | 181376,6667 | 3741,311416 | 218450      | 14995,2737  |

|        |             |              |             |             |             |             |             |             |             |             |             |             |
|--------|-------------|--------------|-------------|-------------|-------------|-------------|-------------|-------------|-------------|-------------|-------------|-------------|
| P33527 | 45077,33333 | 14222,05511  | 31086,33333 | 1917,128524 | 37847,33333 | 3773,262131 | 47468,33333 | 1911,343884 | 37308,66667 | 1303,90597  | 35185       | 11522,81923 |
| P33947 | 12630       | 6556,693781  | 1997,166667 | 1244,033698 | 3383,666667 | 3383,666667 | 1376,933333 | 710,2167423 | 16396       | 9049,334801 | 5512,666667 | 5512,666667 |
| P34897 | 217200      | 7583,224908  | 158703,3333 | 4666,991655 | 182710      | 10060,10603 | 201743,3333 | 5417,226638 | 192193,3333 | 24486,49855 | 192350      | 5925,954213 |
| P34932 | 110569      | 14097,26857  | 257403,3333 | 49608,04449 | 192623,3333 | 17983,48996 | 154576,6667 | 7618,123858 | 130536,6667 | 12247,70092 | 150466,6667 | 9542,037402 |
| P35080 | 85735,66667 | 14717,7969   | 41323,33333 | 21080,25149 | 67551,33333 | 3785,017232 | 67776,33333 | 968,3674119 | 53137       | 1556,041238 | 76895,66667 | 9356,680774 |
| P35222 | 197253,3333 | 2836,784173  | 120520      | 3965,064102 | 134660,6667 | 56294,59098 | 158817,6667 | 65506,19262 | 156597,6667 | 63145,24922 | 88139,66667 | 58966,01703 |
| P35228 | 287576,6667 | 15578,64386  | 390356,6667 | 43706,52596 | 759200      | 28819,8375  | 625476,6667 | 17023,05234 | 1490133,333 | 101526,8164 | 1760333,333 | 41372,06519 |
| P35232 | 626200      | 32682,56008  | 571953,3333 | 19735,44555 | 641306,6667 | 42178,51599 | 594743,3333 | 17382,53945 | 528800      | 14806,18902 | 625590      | 33598,11949 |
| P35237 | 367230      | 27692,75898  | 335540      | 4017,200518 | 309156,6667 | 15932,1063  | 306210      | 32649,59775 | 388503,3333 | 17419,2282  | 355713,3333 | 8649,786767 |
| P35268 | 441620      | 16189,92382  | 332740      | 20211,37304 | 457450      | 8003,430514 | 398470      | 30235,32757 | 327066,6667 | 10364,98003 | 471956,6667 | 2802,762526 |
| P35270 | 8974,333333 | 1608,394945  | 6005,266667 | 368,8740089 | 5626,666667 | 784,9938521 | 4925,8      | 819,9982764 | 4537,733333 | 215,4834281 | 3750,533333 | 1875,688533 |
| P35475 | 47465,33333 | 676,385081   | 33288,33333 | 2095,502035 | 27210,66667 | 7994,828127 | 47450,33333 | 2081,986258 | 36827       | 4936,822764 | 28584,66667 | 1385,258923 |
| P35527 | 1782900     | 26879,91815  | 690950      | 10393,66634 | 811830      | 34709,47421 | 624390      | 38597,59621 | 634103,3333 | 9715,208581 | 671580      | 45473,52966 |
| P35573 | 30334,66667 | 1815,797927  | 30013,66667 | 1437,183163 | 26471,33333 | 3168,950107 | 19626,66667 | 970,1687711 | 25394,66667 | 250,8414727 | 28500,66667 | 2956,813394 |
| P35579 | 2583866,667 | 41719,31341  | 2860166,667 | 152150,3241 | 2198900     | 20628,70169 | 2315766,667 | 64720,99951 | 2378700     | 89592,98708 | 2406733,333 | 60577,50774 |
| P35580 | 299330      | 23351,06921  | 297850      | 9946,136603 | 226313,3333 | 16448,07216 | 248030      | 17950,5441  | 249733,3333 | 18319,30706 | 277706,6667 | 17708,93403 |
| P35606 | 459480      | 14254,35489  | 480080      | 45646,12178 | 478553,3333 | 21869,56815 | 536096,6667 | 9123,486785 | 556536,6667 | 25244,29529 | 620470      | 25999,24678 |
| P35637 | 38656,66667 | 2193,942747  | 47004,66667 | 2368,931569 | 37491,66667 | 2100,539164 | 43104       | 1583,862052 | 47179       | 3744,096731 | 41637,33333 | 1116,703681 |
| P35754 | 115673,3333 | 3519,442822  | 104813,6667 | 5841,594541 | 93533,33333 | 5172,265278 | 103528,3333 | 2305,616934 | 101827,6667 | 7918,027034 | 104507      | 7762,060873 |
| P35908 | 1498300     | 129425,3839  | 902903,3333 | 53895,58434 | 870866,6667 | 63488,2914  | 763086,6667 | 88902,02966 | 1288446,667 | 179108,2508 | 773546,6667 | 54068,6281  |
| P35998 | 99640       | 3945,178492  | 94756,33333 | 6608,871067 | 98131       | 2798,449035 | 103596,6667 | 5781,655857 | 103333,3333 | 7401,294692 | 100517,3333 | 4043,798599 |
| P36222 | 2331700     | 49303,0425   | 2127533,333 | 125879,4308 | 2727466,667 | 129076,8806 | 2885000     | 56526,18862 | 2202500     | 47044,55335 | 2427566,667 | 17760,58974 |
| P36507 | 26664,66667 | 3249,409656  | 17428       | 8792,080016 | 28895,66667 | 1791,735596 | 19754,66667 | 1829,914236 | 13462,33333 | 6980,186586 | 29645       | 839,6197552 |
| P36542 | 148816,6667 | 10880,44321  | 123046,6667 | 6960,436608 | 124686,6667 | 3550,419381 | 156576,6667 | 17028,04582 | 131446,6667 | 7832,318374 | 125253,3333 | 7415,841902 |
| P36543 | 93146,33333 | 17593,4736   | 65120,33333 | 13704,88109 | 89045,66667 | 7706,572613 | 71360,66667 | 10552,42737 | 77563,66667 | 3267,593729 | 79506,33333 | 3202,330627 |
| P36578 | 965210      | 15171,19749  | 1018396,667 | 27840,23487 | 1086400     | 30195,58467 | 1054800     | 13450,27881 | 1139583,333 | 83427,54508 | 1145833,333 | 55356,25027 |
| P36871 | 1066900     | 40343,15307  | 1181600     | 35113,72002 | 1034843,333 | 41252,92973 | 1122666,667 | 31894,32203 | 1267100     | 80246,68217 | 1152333,333 | 21833,486   |
| P36957 | 230090      | 11841,76648  | 184200      | 11524,25413 | 210566,6667 | 10584,78363 | 256123,3333 | 6313,58412  | 249110      | 12070,33692 | 204943,3333 | 13760,97663 |
| P37108 | 274533,3333 | 7101,695416  | 238800      | 5122,343214 | 231366,6667 | 26913,8467  | 211916,6667 | 16314,72988 | 226963,3333 | 1879,799044 | 218670      | 3377,489206 |
| P37802 | 436443,3333 | 3665,921136  | 568946,6667 | 30436,636   | 381950      | 17178,71454 | 518033,3333 | 11400,53264 | 487363,3333 | 5638,097591 | 425170      | 21670,85677 |
| P37837 | 1438800     | 47065,09676  | 1342000     | 14440,56786 | 1346066,667 | 100285,9301 | 1506866,667 | 69035,28888 | 1513100     | 34489,27369 | 1496766,667 | 38928,32445 |
| P38117 | 20903,33333 | 10560,89302  | 19765       | 9921,977474 | 4385,666667 | 4385,666667 | 0           | 0           | 14818,33333 | 856,1892963 | 0           | 0           |
| P38159 | 46780,33333 | 3530,989915  | 63049,66667 | 3832,782468 | 47769,33333 | 1866,647827 | 41912,66667 | 3039,510779 | 12715,66667 | 12715,66667 | 52820,66667 | 5196,573946 |
| P38606 | 945850      | 46353,66976  | 920030      | 25675,69733 | 921756,6667 | 31891,16614 | 1039466,667 | 19017,74026 | 975226,6667 | 36298,5038  | 972950      | 28152,73758 |
| P38646 | 596943,3333 | 11906,94802  | 606303,3333 | 11943,30542 | 687726,6667 | 37025,42835 | 660420      | 27090,54694 | 627130      | 34018,71397 | 634956,6667 | 41730,2218  |
| P38919 | 81555,33333 | 33463,36099  | 45045,33333 | 16556,90767 | 18572,66667 | 1113,956691 | 95318,33333 | 7493,808163 | 68662       | 25894,65069 | 62492,33333 | 24968,84646 |
| P39019 | 73050,33333 | 46229,577711 | 50534       | 7428,221613 | 59535       | 5807,656355 | 69648       | 8009,580035 | 69963,66667 | 6445,455695 | 60864,66667 | 2776,455314 |
| P39023 | 458770      | 25865,81206  | 551993,3333 | 26764,18772 | 448930      | 22216,31458 | 533876,6667 | 15650,44444 | 475636,6667 | 16552,39191 | 509536,6667 | 20160,46654 |
| P39656 | 654923,3333 | 13775,78713  | 605636,6667 | 14796,96403 | 663276,6667 | 13456,68648 | 738403,3333 | 11470,8287  | 744843,3333 | 8215,697035 | 678383,3333 | 19221,03044 |
| P40121 | 448226,6667 | 9270,642432  | 413186,6667 | 16482,49206 | 460023,3333 | 43186,038   | 393023,3333 | 3216,780654 | 506126,6667 | 11010,72407 | 426186,6667 | 12489,79895 |
| P40227 | 159967      | 41716,8875   | 254700      | 14390,36252 | 182526,6667 | 19205,39536 | 195426,6667 | 15960,89005 | 183303,3333 | 10346,31228 | 158890      | 16480,73522 |
| P40261 | 627673,3333 | 30187,98124  | 783846,6667 | 39478,27982 | 793423,3333 | 14674,24539 | 994113,3333 | 786650      | 39269,88711 | 701090      | 39269,88711 | 73726,8072  |
| P40429 | 123813,6667 | 35525,47429  | 179716,6667 | 7802,948873 | 165576,6667 | 23185,14563 | 216706,6667 | 3773,138982 | 125671,6667 | 25543,20235 | 121656      | 37240,00979 |
| P40616 | 32246       | 2205,018896  | 8587,733333 | 1602,378671 | 25746       | 3223,823972 | 23417,33333 | 1597,488898 | 40645       | 4651,756048 | 41280,66667 | 4935,929171 |
| P40763 | 20415,33333 | 11379,38044  | 26745,33333 | 3413,912825 | 26610,66667 | 3131,723558 | 34486,66667 | 5428,118653 | 9736,666667 | 5381,16621  | 23757,66667 | 3426,435774 |
| P40925 | 225716,6667 | 13665,17268  | 182393,3333 | 6412,545863 | 171866,6667 | 38786,21654 | 226866,6667 | 1703,812718 | 241363,3333 | 13911,28599 | 241346,6667 | 25397,89318 |
| P40926 | 566283,3333 | 68687,56227  | 409513,3333 | 40989,6899  | 602903,3333 | 17688,68691 | 483066,6667 | 25694,07476 | 523023,3333 | 27298,57526 | 521800      | 28692,02735 |
| P40939 | 852296,6667 | 232180,8706  | 1176943,333 | 110675,0794 | 1074730     | 117812,5838 | 1281066,667 | 75278,37966 | 1150726,667 | 122736,0965 | 1376533,333 | 75161,74411 |
| P41091 | 27008       | 6854,763405  | 36641,66667 | 10490,82444 | 33068       | 3876,342219 | 27055,66667 | 6060,196926 | 19251       | 4161,454714 | 36489,66667 | 10094,30834 |
| P41250 | 593633,3333 | 40071,20094  | 584186,6667 | 5407,631439 | 600146,6667 | 39649,68152 | 527150      | 37708,18523 | 526476,6667 | 41071,76254 | 563273,3333 | 7127,45942  |
| P41252 | 727733,3333 | 9010,328025  | 618326,6667 | 30680,52929 | 646103,3333 | 25599,82183 | 609833,3333 | 10681,06788 | 759183,3333 | 56819,93791 | 723800      | 40351,96939 |
| P42167 | 32009,66667 | 5560,852822  | 48475       | 4880,38547  | 21718,33333 | 10894,49929 | 43477,33333 | 3301,456059 | 39899       | 2162,122645 | 26201       | 6689,235033 |
| P42224 | 1013863,333 | 43860,58228  | 813163,3333 | 15190,12216 | 2085766,667 | 25771,06474 | 38059,66077 | 1296933,333 | 36037,40341 | 1152333,333 | 45958,68918 | 45958,68918 |
| P42226 | 13910,33333 | 2176,839631  | 4308,4      | 310,8936796 | 13107,33333 | 697,9709481 | 6970,866667 | 952,6565669 | 8750        | 4412,179167 | 12835,66667 | 151,3916921 |
| P42330 | 34529,66667 | 17293,45171  | 25246       | 5252,2545   | 17395,33333 | 17395,33333 | 12970,66667 | 12970,66667 | 55188,66667 | 9314,211817 | 44782,66667 | 4349,164377 |
| P42704 | 34933       | 2549,665272  | 15693,66667 | 319,341684  | 33751       | 4286,161142 | 31190,66667 | 833,0550869 | 36848       | 1156,321899 | 35305,66667 | 4299,566503 |
| P42765 | 22281,66667 | 3006,926689  | 42124,33333 | 6055,908556 | 0           | 0           | 36089,33333 | 5437,799565 | 0           | 0           | 11328,33333 | 11328,33333 |
| P42766 | 99741,66667 | 12655,04227  | 138540      | 12384,83078 | 97267       | 4816,425127 | 135140      | 8577,915442 | 121423,3333 | 10960,45214 | 105105      | 16608,40619 |
| P43034 | 89369,66667 | 5075,003623  | 58510,66667 | 16313,05949 | 51977,43333 | 23118,49632 | 99274,66667 | 5090,572507 | 92357       | 12795,61082 | 84994       | 4445,342394 |
| P43304 | 101482,6667 | 9115,844107  | 49524,66667 | 836,3185863 | 100405,6667 | 5767,332553 | 97063       | 3140,305134 | 96810       | 7164,477185 | 95768       | 1142,327595 |
| P43307 | 457873,3333 | 15632,70539  | 337840      | 12342,17296 | 447443,3333 | 28217,57982 | 450303,3333 | 7921,05282  | 566630      | 12264,71497 | 454923,3333 | 7780,844713 |
| P43490 | 255733,3333 | 30669,8578   | 371770      | 29631,44107 | 696590      | 17821,76101 | 682590      | 32695,4008  | 690366,6667 | 16073,90052 | 641450      | 14666,20946 |
| P43686 | 24715,66667 | 1691,396891  | 22077,33333 | 1634,758732 | 26808,66667 | 393,1794897 | 19199       | 9736,253095 | 15320       | 7728,707546 | 14692       | 7383,252152 |
| P45880 | 586003,3333 |              |             |             |             |             |             |             |             |             |             |             |

|        |             |             |             |             |             |             |             |             |             |             |             |             |
|--------|-------------|-------------|-------------|-------------|-------------|-------------|-------------|-------------|-------------|-------------|-------------|-------------|
| P45974 | 98113,66667 | 4419,090417 | 73457,33333 | 4714,298829 | 88372       | 7056,019369 | 75033       | 791,5935405 | 78720,33333 | 9508,223061 | 78148,33333 | 7376,776042 |
| P46063 | 198676,6667 | 4005,805509 | 197313,3333 | 6569,315878 | 161493,3333 | 5495,54466  | 215513,3333 | 17962,23105 | 196340      | 5130,198177 | 205476,6667 | 6356,669289 |
| P46459 | 252010      | 1729,286944 | 226253,3333 | 7825,463423 | 166080      | 69005,07397 | 272270      | 12298,45654 | 97807,66667 | 67502,21123 | 238460      | 8811,424402 |
| P46776 | 397630      | 32533,44484 | 417706,6667 | 13229,12108 | 400016,6667 | 38515,68266 | 511580      | 17577,75014 | 486676,6667 | 16264,5364  | 444316,6667 | 39080,92473 |
| P46778 | 53950,33333 | 8072,435947 | 45394,66667 | 912,2429014 | 49670,33333 | 11523,10465 | 66581,66667 | 5656,729748 | 64678       | 6802,874711 | 60804,33333 | 12720,04188 |
| P46781 | 386283,3333 | 5861,161243 | 353456,6667 | 6870,519954 | 321926,6667 | 18458,14755 | 445363,3333 | 13576,5169  | 347816,6667 | 7060,522486 | 285757,6667 | 100779,9629 |
| P46782 | 329256,6667 | 42163,34954 | 315776,6667 | 16695,8601  | 401330      | 15965,97111 | 325076,6667 | 17687,71356 | 361556,6667 | 23891,46035 | 394680      | 32389,26726 |
| P46783 | 566286,6667 | 23831,47802 | 381226,6667 | 2665,785271 | 591900      | 30439,19239 | 445940      | 20325,20685 | 621793,3333 | 16137,76661 | 635480      | 28714,78771 |
| P46926 | 122086,6667 | 6524,263262 | 80505,33333 | 14965,17381 | 56709,33333 | 26510,56523 | 111370,6667 | 9331,611174 | 99568       | 998,3272676 | 125016,6667 | 6458,176557 |
| P46940 | 2136166,667 | 155418,8356 | 1784033,333 | 54866,94006 | 1722233,333 | 28402,13216 | 1947966,667 | 63156,69226 | 1865166,667 | 37399,92573 | 2291200     | 74424,27919 |
| P46976 | 193336,6667 | 5922,815584 | 49465       | 3222,032019 | 24804,66667 | 13255,54516 | 47131,33333 | 888,265038  | 27621,66667 | 15549,86714 | 50955,66667 | 2808,142051 |
| P46977 | 403186,6667 | 23612,59645 | 419350      | 5144,871233 | 333016,6667 | 9615,172616 | 457163,3333 | 4035,915152 | 432840      | 21186,62392 | 463110      | 1816,847086 |
| P47756 | 265203,3333 | 23181,16788 | 340960      | 100669,9366 | 317713,3333 | 47396,08786 | 283380      | 19213,27753 | 315736,6667 | 30934,11403 | 338660      | 20529,8766  |
| P47897 | 160743,3333 | 4645,285543 | 134150      | 9551,739807 | 160643,3333 | 10461,84231 | 155843,3333 | 14201,77728 | 141000      | 11706,29887 | 151116,6667 | 14514,16588 |
| P47914 | 73520       | 36776,02117 | 63426,66667 | 63426,66667 | 33124,33333 | 33124,33333 | 140223,3333 | 1536,341253 | 70120       | 35146,56787 | 68271,66667 | 34351,23049 |
| P48047 | 86324       | 12633,40989 | 79307       | 1530,665324 | 84935       | 8245,031777 | 78906,33333 | 6492,093893 | 80878,66667 | 5283,213111 | 80889,33333 | 8974,105068 |
| P48147 | 130443,3333 | 13857,22114 | 52227,66667 | 3176,547934 | 114310,3333 | 21252,1646  | 99276,33333 | 9536,093021 | 121360      | 14941,81158 | 98374       | 4382,000609 |
| P48163 | 51053,33333 | 51053,33333 | 12475,33333 | 12475,33333 | 0           | 0           | 80739,33333 | 58528,73016 | 36940       | 36940       | 0           | 0           |
| P48444 | 679366,6667 | 13035,2782  | 661166,6667 | 58343,30191 | 662790      | 16075,9769  | 681233,3333 | 27232,07994 | 667446,6667 | 13531,18661 | 703766,6667 | 27671,42469 |
| P48506 | 12062,2     | 1725,907116 | 12686,33333 | 1739,602094 | 6906,5      | 3576,654967 | 12224,66667 | 1577,465196 | 11838,3     | 1341,64236  | 9658,966667 | 1842,255475 |
| P48507 | 39611       | 2466,243297 | 13996,1     | 2152,542336 | 44468,33333 | 9414,488857 | 47868,66667 | 2830,794961 | 43560       | 5933,960089 | 47028       | 7285,863115 |
| P48509 | 244686,6667 | 23770,33048 | 311453,3333 | 27984,11593 | 224346,6667 | 23637,8188  | 264226,6667 | 9538,059435 | 209566,6667 | 12178,36515 | 261636,6667 | 16376,16289 |
| P48643 | 370866,6667 | 19394,21936 | 317816,6667 | 10912,77895 | 290656,6667 | 14713,93029 | 382143,3333 | 11273,66449 | 364403,3333 | 43302,25142 | 309010      | 44898,68743 |
| P48735 | 515686,6667 | 39650,81182 | 319836,6667 | 17942,28184 | 465363,3333 | 21687,26226 | 316023,3333 | 47877,83389 | 370830      | 73589,19758 | 319786,6667 | 52795,8238  |
| P48739 | 11400,36667 | 3693,730265 | 5194        | 2615,493807 | 22184       | 5612,47833  | 12482,63333 | 1443,336632 | 27834,66667 | 14585,53215 | 14314,66667 | 1901,932468 |
| P49189 | 449346,6667 | 8931,032664 | 427530      | 3612,649074 | 392576,6667 | 12270,77875 | 437563,3333 | 4549,294207 | 442120      | 12847,32008 | 407450      | 10571,1305  |
| P49257 | 176333,3333 | 41295,30334 | 297013,3333 | 29956,0836  | 319830      | 35115,87153 | 250926,6667 | 52645,97621 | 477026,6667 | 30896,90186 | 323006,6667 | 23957,90359 |
| P49327 | 262963,3333 | 17936,88224 | 299470      | 20879,59371 | 194256,6667 | 21467,66121 | 307030      | 10173,54085 | 299546,6667 | 6753,775076 | 265890      | 19876,26474 |
| P49368 | 758180      | 34218,80769 | 704050      | 16887,84869 | 766423,3333 | 36292,93519 | 671863,3333 | 4602,949537 | 709490      | 9498,980647 | 737030      | 32928,21435 |
| P49411 | 165066,6667 | 17078,19012 | 162980      | 11707,84495 | 154976,6667 | 3362,441243 | 181750      | 1646,481096 | 141760      | 16398,01919 | 178093,3333 | 14440,13427 |
| P49585 | 34128,66667 | 8972,694919 | 31991,33333 | 9083,254416 | 24148,33333 | 2859,183469 | 29710,33333 | 3923,654943 | 23793,33333 | 4135,078892 | 21687,33333 | 3530,044208 |
| P49588 | 259763,3333 | 17112,39057 | 238203,3333 | 8705,029836 | 268643,3333 | 11558,45626 | 273303,3333 | 18544,15841 | 209236,6667 | 38029,39229 | 287820      | 11249,08441 |
| P49589 | 180597      | 113597,2179 | 246873,3333 | 10971,20828 | 203765,6667 | 84366,43182 | 210139,6667 | 76448,72604 | 228822,6667 | 93889,77641 | 51895,66667 | 8030,946485 |
| P49591 | 379506,6667 | 13261,41563 | 283346,6667 | 13932,85366 | 321763,3333 | 14351,37198 | 295710      | 2565,85918  | 339703,3333 | 31253,55251 | 329946,6667 | 11254,57882 |
| P49720 | 18752       | 9679,738581 | 21852,33333 | 1132,166703 | 28747,66667 | 2427,952384 | 21267       | 1596,364724 | 27359       | 3034,274598 | 27127,33333 | 3166,026549 |
| P49721 | 110557,6667 | 6398,9394   | 89046       | 6516,189991 | 154610      | 9805,520554 | 109095,3333 | 19838,91114 | 118490      | 4426,635291 | 121856,6667 | 11593,05875 |
| P49748 | 290040      | 18366,65185 | 283286,6667 | 3376,68641  | 314070      | 23155,03041 | 253623,3333 | 28846,00743 | 288240      | 19835,17162 | 290033,3333 | 6620,013427 |
| P49755 | 141920      | 14167,7427  | 167650      | 5634,607351 | 185956,6667 | 4712,070788 | 140983,3333 | 4713,276756 | 160810      | 13903,40366 | 165053,3333 | 7105,203101 |
| P50213 | 155556,6667 | 10422,87602 | 81751,33333 | 5372,332651 | 118136,6667 | 964,3189883 | 98485,66667 | 1193,820804 | 142213,3333 | 8646,352474 | 132946,6667 | 2831,668138 |
| P50281 | 85304,33333 | 8437,404367 | 71282,66667 | 5117,200613 | 75480       | 4029,646759 | 82315,33333 | 8212,543665 | 61214       | 10242,46403 | 75147       | 8927,715404 |
| P50395 | 495726,6667 | 6694,849596 | 497613,3333 | 7220,723263 | 519933,3333 | 48542,67172 | 444686,6667 | 4868,06715  | 482606,6667 | 36063,02924 | 472900      | 45612,14129 |
| P50402 | 0           | 0           | 22530       | 3253,802442 | 6063        | 6063        | 0           | 0           | 4231,333333 | 4231,333333 | 4161,333333 | 4161,333333 |
| P50453 | 144673,3333 | 2423,718447 | 68970,66667 | 6519,780833 | 104060,6667 | 7159,799842 | 92025       | 9675,847577 | 122070      | 7210,020804 | 112953,3333 | 4375,745016 |
| P50454 | 2905100     | 67953,2192  | 2027533,333 | 42820,17956 | 2929466,667 | 118351,2334 | 2371600     | 45164,03436 | 2774500     | 31375,20252 | 2594633,333 | 46101,49431 |
| P50552 | 9869,466667 | 1740,018905 | 5776,133333 | 2985,803424 | 16065,33333 | 4805,951357 | 7283,9      | 4218,76166  | 11969,5     | 6790,491526 | 19244,33333 | 3569,935589 |
| P50570 | 139376,6667 | 15057,17695 | 112640      | 4960,204969 | 119990      | 11528,55585 | 109347,6667 | 11710,0731  | 121040      | 4960,053763 | 138216,6667 | 14940,42875 |
| P50914 | 552666,6667 | 58214,33997 | 383500      | 23860,27941 | 585366,6667 | 61034,18204 | 493926,6667 | 25335,47732 | 449800      | 11849,43459 | 545423,3333 | 28407,64236 |
| P50990 | 1049740     | 55556,44817 | 1100433,333 | 50184,20513 | 1061866,667 | 26402,10429 | 1192500     | 36604,55345 | 1084000     | 15372,8115  | 983576,6667 | 48619,63949 |
| P50991 | 519253,3333 | 23108,67394 | 498276,6667 | 41918,89484 | 598886,6667 | 49816,70447 | 723123,3333 | 41179,41085 | 601940      | 86434,83113 | 657453,3333 | 18898,97822 |
| P50995 | 535740      | 33538,34273 | 421843,3333 | 10528,08361 | 502163,3333 | 4333,129482 | 486276,6667 | 24248,51221 | 458760      | 4666,201167 | 429776,6667 | 25145,33246 |
| P51148 | 64559       | 2296,307761 | 53100       | 2177,233183 | 55043,66667 | 3406,880897 | 63150,33333 | 1198,982949 | 52416,33333 | 6034,462841 | 45680       | 2654,625586 |
| P51149 | 426703,3333 | 4140,194574 | 341566,6667 | 8506,141572 | 416790      | 9613,866721 | 434273,3333 | 19057,26487 | 392643,3333 | 9913,990675 | 400153,3333 | 12195,56522 |
| P51571 | 225203,3333 | 13234,18469 | 192213,3333 | 7442,305497 | 231990      | 6466,304973 | 237166,6667 | 7127,527232 | 277453,3333 | 16145,1028  | 239106,6667 | 9127,895583 |
| P51572 | 147220      | 10299,25402 | 141060      | 2610,944912 | 148866,6667 | 10742,02391 | 156150      | 3211,168012 | 121776,6667 | 22092,14516 | 135820      | 13053,0469  |
| P51648 | 140750      | 3957,815054 | 115413,3333 | 4571,652995 | 139386,3333 | 29419,82642 | 133010      | 12091,32471 | 105189,3333 | 7382,52146  | 97912,33333 | 6561,667124 |
| P51659 | 204243,3333 | 5515,452031 | 194683,3333 | 9240,954737 | 172886,6667 | 9746,155367 | 214506,6667 | 9050,333941 | 163980      | 21112,45841 | 152353,3333 | 23142,86091 |
| P51665 | 75507       | 4841,914601 | 31710,63333 | 13015,70267 | 82458       | 1546,407881 | 40443,66667 | 12328,69675 | 85052       | 5454,338548 | 82462,66667 | 2873,551481 |
| P51688 | 172723,3333 | 22801,91683 | 142906,6667 | 6347,735379 | 143245,3333 | 30701,41335 | 200700      | 19806,68911 | 156496,6667 | 8526,838674 | 127986,3333 | 23300,7241  |
| P51884 | 272676,6667 | 23055,8238  | 269786,6667 | 16218,03763 | 341676,6667 | 4574,368202 | 283040      | 8847,140781 | 274750      | 5311,63189  | 226820      | 38689,47273 |
| P51888 | 31293       | 3106,211573 | 10846,36667 | 1172,092204 | 28534,33333 | 2711,872436 | 14221,66667 | 855,7821634 | 18850,33333 | 652,6720293 | 24293,66667 | 1104,755981 |
| P51991 | 25898,3     | 9451,505045 | 23456,66667 | 11266,7689  | 12851,26667 | 6314,552144 | 21294,66667 | 11460,96036 | 24041,96667 | 10092,10574 | 24045,73333 | 10639,79221 |
| P52209 | 467566,6667 | 47969,06272 | 359206,6667 | 10234,9179  | 502150      | 23108,246   | 525016,6667 | 43772,33333 | 43772,33333 | 7833,050349 | 443116,6667 | 28145,53685 |
| P52272 | 214593,3333 | 10909,20763 | 243596,6667 | 15660,08337 | 213270      | 20220,4113  | 259916,6667 | 12903,04658 | 237333,3333 | 18753,39021 | 240896,6667 | 8924,201801 |
| P52565 | 133470      | 20609,37246 | 141810      | 2663,813057 | 106         |             |             |             |             |             |             |             |

|        |             |             |             |             |             |             |             |             |             |             |             |              |
|--------|-------------|-------------|-------------|-------------|-------------|-------------|-------------|-------------|-------------|-------------|-------------|--------------|
| P52895 | 115776,6667 | 17405,80108 | 245943,3333 | 14780,95659 | 166266,6667 | 19885,43884 | 146783,3333 | 8113,037519 | 199933,3333 | 11024,37653 | 180010      | 23757,87519  |
| P52907 | 314616,6667 | 6801,216394 | 257863,3333 | 4148,936946 | 357263,3333 | 7205,61201  | 312983,3333 | 10622,4563  | 313026,6667 | 13154,32671 | 311743,3333 | 7300,61489   |
| P52943 | 69009       | 8862,726838 | 29232,66667 | 12068,92111 | 17813,66667 | 3173,342945 | 42834       | 14679,40497 | 34831,66667 | 11118,5583  | 43296,66667 | 10763,66743  |
| P53004 | 147043,3333 | 13542,61709 | 100017,3333 | 6788,188795 | 172513,3333 | 6493,264031 | 166133,3333 | 2093,978138 | 175170      | 4987,327274 | 143660      | 12626,74938  |
| P53396 | 155490      | 18529,71218 | 169613,3333 | 5519,119294 | 184433,3333 | 4857,081886 | 179763,3333 | 6987,489614 | 169476,6667 | 5802,230414 | 185686,6667 | 10436,52294  |
| P53618 | 375276,6667 | 17319,66544 | 286693,3333 | 7233,003833 | 381393,3333 | 11061,33858 | 362083,3333 | 21828,70613 | 424990      | 17451,39249 | 364423,3333 | 10260,20847  |
| P53621 | 669020      | 31106,58183 | 563703,3333 | 15291,45331 | 546620      | 18165,11584 | 681203,3333 | 23180,1613  | 677806,6667 | 52085,72176 | 731076,6667 | 20852,38462  |
| P53634 | 9605        | 5278,101774 | 4179,8      | 1133,364294 | 10313,36667 | 1239,344168 | 6607,233333 | 377,5392356 | 15600,66667 | 2594,987112 | 9579,533333 | 803,8180398  |
| P53801 | 125300      | 2443,569793 | 122196,6667 | 4981,158946 | 139973,3333 | 4274,300463 | 147360      | 8382,72231  | 123130      | 6232,209346 | 147490      | 8988,531582  |
| P53992 | 61032       | 2489,217347 | 54468,33333 | 4693,935816 | 60132,66667 | 3659,49151  | 57761       | 1149,231192 | 52703       | 696,3973961 | 58409,66667 | 1126,423001  |
| P53999 | 17183,33333 | 17183,33333 | 0           | 0           | 11033       | 11033       | 33598,66667 | 16823,27472 | 59398,33333 | 11681,77968 | 12229,66667 | 12229,66667  |
| P54136 | 143500      | 20798,85814 | 138740      | 15321,44358 | 159610      | 10300,74916 | 147013,3333 | 8227,402047 | 139960      | 4925,944918 | 125466,6667 | 8958,0667748 |
| P54577 | 259456,6667 | 58837,04511 | 269910      | 54666,30041 | 266883,3333 | 3626,367941 | 291383,3333 | 45689,84764 | 295976,6667 | 37473,88483 | 232263,3333 | 15859,94676  |
| P54619 | 21655       | 10904,97631 | 36108,33333 | 3634,368369 | 26990       | 3394,132781 | 36201,33333 | 232,2651741 | 21317,33333 | 10688,44682 | 31675       | 1531,074895  |
| P54652 | 149566,3333 | 63011,82672 | 258100      | 65863,69587 | 175726,6667 | 47199,41537 | 257780      | 54265,26452 | 184800      | 54867,83848 | 236260      | 94636,05145  |
| P54687 | 27531,66667 | 3762,260727 | 51338,33333 | 2351,720316 | 74720       | 18401,22565 | 63010,33333 | 2545,476925 | 62183,33333 | 16890,80523 | 60740       | 22072,8681   |
| P54802 | 118143,3333 | 4812,297903 | 32534,33333 | 6273,099455 | 88130,33333 | 2982,200213 | 80425,33333 | 1469,123246 | 91831       | 1564,160158 | 92116,66667 | 6635,286588  |
| P54819 | 12282,66667 | 6261,778617 | 23412,66667 | 1958,842714 | 17825,33333 | 2018,440845 | 24592,66667 | 882,0690323 | 13647,33333 | 7464,713532 | 14788,66667 | 7689,232847  |
| P54886 | 29382       | 1808,666636 | 35216,33333 | 2977,761482 | 42973,33333 | 12163,21637 | 32572,33333 | 3338,917256 | 29452,66667 | 2628,256858 | 40235       | 1906,884982  |
| P54920 | 53706,66667 | 4880,981538 | 59718       | 9461,850348 | 51950       | 1828,857294 | 66790,66667 | 2390,460927 | 61367,66667 | 4438,337088 | 51213,33333 | 2451,309945  |
| P55010 | 26377,33333 | 2655,268871 | 19062,66667 | 1348,449274 | 26494,33333 | 2553,849012 | 26949,33333 | 588,9103874 | 36890,33333 | 3495,110696 | 30213       | 359,0464223  |
| P55036 | 45275,66667 | 4784,21057  | 48857       | 4064,682808 | 48026,66667 | 2480,038086 | 37541,66667 | 3311,387641 | 38967,66667 | 2423,995072 | 39102,66667 | 4066,491376  |
| P55060 | 45021       | 2843,408694 | 29977,66667 | 2762,672699 | 37137,33333 | 971,1001207 | 41978,33333 | 931,4451734 | 53328,66667 | 7230,807017 | 35605,33333 | 2487,529319  |
| P55072 | 1699233,333 | 48512,20923 | 1644600     | 48311,17883 | 1638333,333 | 229409,8249 | 1699400     | 59756,53381 | 1930833,333 | 91215,6663  | 1846933,333 | 21338,25464  |
| P55084 | 699986,6667 | 21060,74732 | 687636,6667 | 4678,049214 | 628806,6667 | 25956,24288 | 681963,3333 | 9006,361332 | 624950      | 12710,15867 | 653900      | 6819,540551  |
| P55209 | 40187,33333 | 4530,738804 | 24408       | 1313,003173 | 44658,33333 | 6062,4044   | 46015,33333 | 47641,33333 | 4016,104677 | 43522,33333 | 3752,985493 | 3752,985493  |
| P55287 | 5380,666667 | 5380,666667 | 10030,66667 | 5026,654332 | 3046,766667 | 3046,766667 | 8593,466667 | 5265,870357 | 4066,666667 | 4066,666667 | 3358,666667 | 3358,666667  |
| P55735 | 38802,66667 | 23506,67637 | 24973,66667 | 2080,938917 | 32533,66667 | 16020,05253 | 26595,33333 | 1531,500934 | 71219,66667 | 1296,005958 | 49708       | 13931,0312   |
| P55786 | 245350      | 13422,46003 | 220876,6667 | 20235,33653 | 242353,3333 | 10642,62551 | 217560      | 4079,865194 | 254203,3333 | 15512,04944 | 249086,6667 | 18359,60269  |
| P55884 | 116933,3333 | 6711,299758 | 72266,33333 | 9057,417703 | 101059,6667 | 5695,372108 | 108512,3333 | 12225,22224 | 115667      | 15700,58955 | 100686      | 5644,635447  |
| P56134 | 64743,33333 | 4309,086768 | 55713,66667 | 4812,21835  | 61394       | 5118,368132 | 55197       | 2369,305454 | 59503,33333 | 6556,671979 | 69181,33333 | 2513,937571  |
| P56192 | 51132,66667 | 14325,24151 | 55240,33333 | 7924,823538 | 52606,66667 | 7629,149567 | 65480,66667 | 11139,2761  | 58166       | 6953,967093 | 56451,33333 | 7658,30687   |
| P57053 | 32528       | 16545,94524 | 92500,66667 | 3070,954756 | 51172,33333 | 2506,552103 | 49671,33333 | 6429,372814 | 39633       | 7577,128678 | 54576       | 5305,434855  |
| P57088 | 49641,33333 | 4783,530402 | 37180,66667 | 2552,276783 | 41699,33333 | 1125,490165 | 54234,66667 | 3481,527841 | 63157,66667 | 15644,7375  | 51657,33333 | 9655,080085  |
| P59998 | 436510      | 32849,68848 | 455176,6667 | 29971,70017 | 358773,3333 | 24174,45093 | 441306,6667 | 10069,41298 | 361916,6667 | 15236,42274 | 460143,3333 | 39940,7112   |
| P60174 | 6094733,333 | 166552,6677 | 6403766,667 | 197979,4235 | 6438233,333 | 147944,633  | 6280333,333 | 123685,9644 | 7247833,333 | 264526,2516 | 6595733,333 | 227106,8789  |
| P60228 | 29201,33333 | 244,4383585 | 0           | 0           | 39761,66667 | 2578,116905 | 7956,166667 | 1518,347942 | 37825,66667 | 1895,932869 | 34873       | 3734,085832  |
| P60468 | 95357,66667 | 11187,45882 | 97559,66667 | 7489,475334 | 83805       | 1534,622212 | 110816,6667 | 6802,426855 | 117790      | 4820,750287 | 95343,33333 | 9257,120671  |
| P60660 | 679443,3333 | 27498,51653 | 686600      | 8374,216381 | 667666,6667 | 3358,27502  | 682276,6667 | 5387,084348 | 632486,6667 | 5804,516441 | 661420      | 34178,97161  |
| P60709 | 15376000    | 935414,5249 | 17389000    | 1191258,718 | 17186000    | 132296,3844 | 15675000    | 649863,319  | 13348000    | 539871,5897 | 16416000    | 984526,4513  |
| P60842 | 216970      | 20667,17284 | 254100      | 17651,25019 | 211936,6667 | 12350,65723 | 370566,6667 | 6388,04178  | 278176,6667 | 29146,92113 | 255833,3333 | 18937,02223  |
| P60866 | 203650      | 12179,51696 | 228613,3333 | 20121,32396 | 162906,6667 | 7176,910508 | 225893,3333 | 7312,556173 | 234483,3333 | 9606,716979 | 187416,6667 | 4554,391244  |
| P60891 | 147770      | 7946,37863  | 123790      | 13040,00511 | 150946,6667 | 14825,15467 | 74374       | 25782,02352 | 161223,3333 | 16020,67449 | 161830      | 23837,5593   |
| P60900 | 370780      | 51326,43211 | 421800      | 25244,2713  | 374090      | 9519,381983 | 452756,6667 | 9237,28736  | 428710      | 29484,8283  | 370580      | 25239,04581  |
| P60903 | 333523,3333 | 3777,399164 | 297220      | 7308,552068 | 283973,3333 | 9454,731326 | 339650      | 7062,678906 | 318410      | 8325,064564 | 310176,6667 | 7900,308714  |
| P60953 | 223863,3333 | 62133,88403 | 203236,6667 | 19246,7091  | 284006,6667 | 13624,43923 | 213853,3333 | 16409,80026 | 186253,3333 | 35640,1339  | 196510      | 24461,62914  |
| P60981 | 863420      | 43473,13998 | 810163,3333 | 24195,89038 | 651020      | 52353,12694 | 754476,6667 | 81817,26882 | 744710      | 7706,873555 | 726113,3333 | 9507,797385  |
| P61019 | 179606,6667 | 9618,153553 | 122240      | 2426,815472 | 150843,3333 | 25511,39179 | 170593,3333 | 10529,80584 | 156661,3333 | 33718,52441 | 191640      | 11362,54813  |
| P61026 | 251400      | 21734,37446 | 151816,6667 | 8056,279814 | 197436,6667 | 10707,27219 | 183163,3333 | 10158,87188 | 191486,6667 | 28864,60481 | 194043,3333 | 6292,779813  |
| P61088 | 292346,6667 | 6573,386579 | 261403,3333 | 18222,07483 | 253283,3333 | 15059,48686 | 351116,6667 | 8624,829145 | 310913,3333 | 10181,77184 | 272833,3333 | 28983,5484   |
| P61106 | 81669,66667 | 9186,967043 | 66503,66667 | 7923,83662  | 79226,33333 | 8714,655268 | 83153,33333 | 6903,159816 | 82584,66667 | 1723,986691 | 83767,66667 | 7342,720507  |
| P61158 | 134085,3333 | 23744,226   | 229136,6667 | 10679,60257 | 241513,3333 | 13943,53654 | 151530      | 18368,10551 | 134143,3333 | 18939,65974 | 157916,6667 | 20147,68335  |
| P61160 | 103553,3333 | 9983,3133   | 116594,6667 | 8698,932221 | 105144,3333 | 12266,95977 | 116463,3333 | 6209,42927  | 90661,66667 | 8032,777484 | 123332,3333 | 14612,10442  |
| P61163 | 499343,3333 | 69095,88442 | 60580,66667 | 9657,785967 | 304226,6667 | 59667,88481 | 283626,6667 | 26014,29692 | 59925       | 3426,737564 | 345426,6667 | 43805,1448   |
| P61224 | 127820      | 3679,79619  | 51664,33333 | 1187,374461 | 144683,3333 | 12453,97438 | 84984       | 8084,806388 | 113163,3333 | 4201,818389 | 123473,3333 | 8768,630325  |
| P61247 | 320463,3333 | 15786,95066 | 263683,3333 | 26726,05117 | 354853,3333 | 22425,42778 | 333530      | 40130,63709 | 316283,3333 | 35279,45877 | 333566,6667 | 20251,55989  |
| P61313 | 175060      | 3620,331477 | 223306,6667 | 11716,45045 | 321450      | 5140,01297  | 188066,6667 | 3792,054559 | 230660      | 20291,98857 | 269240      | 21149,93144  |
| P61421 | 7903,333333 | 7903,333333 | 14519       | 7259,816963 | 19039,33333 | 10076,40811 | 11228,33333 | 5716,981498 | 25554       | 5971,547315 | 18905       | 9600,901433  |
| P61604 | 405263,3333 | 18436,07454 | 310986,6667 | 18037,24049 | 317826,6667 | 8863,558979 | 434883,3333 | 23398,65832 | 455626,6667 | 8806,596644 | 357573,3333 | 13013,55874  |
| P61619 | 497356,6667 | 24626,9949  | 441790      | 23814,00918 | 454443,3333 | 8852,13408  | 509393,3333 | 5918,393175 | 521530      | 20881,05441 | 484543,3333 | 15073,4041   |
| P61978 | 1266900     | 90961,91511 | 1263500     | 15535,87247 | 1429200     | 27267,56315 | 1204033,333 | 14041,64441 | 1373866,667 | 48212,7346  | 1233900     | 17643,79022  |
| P61981 | 247023,3333 | 12712,46938 | 204263,3333 | 7706,294685 | 166643,3333 | 8467,353647 | 235040      | 17106,51728 | 155916,6667 | 6443,555782 | 170673,3333 | 9885,897925  |
| P62070 | 14639       | 1126,552706 | 15904       | 1525,571041 | 15912,33333 | 2101,682606 | 20044,66667 | 3936,801169 | 18824,66667 | 2936,560025 | 18517,3333  |              |



|        |             |             |             |             |             |             |             |             |              |             |             |             |
|--------|-------------|-------------|-------------|-------------|-------------|-------------|-------------|-------------|--------------|-------------|-------------|-------------|
| P62140 | 169176,6667 | 3639,827529 | 79152,33333 | 6220,527371 | 146470      | 6345,158259 | 126360      | 9014,987521 | 147703,3333  | 13920,82652 | 153136,6667 | 11044,88016 |
| P62191 | 75549       | 22640,88899 | 29152,33333 | 6466,800918 | 55453,33333 | 9576,395465 | 71084,33333 | 18512,07633 | 89948,66667  | 12355,18019 | 79232,66667 | 10880,14005 |
| P62195 | 165803,3333 | 3565,157001 | 135316,6667 | 16332,59454 | 169590      | 9584,398781 | 161303,3333 | 18082,47433 | 178500       | 17376,35271 | 131846,6667 | 12402,28115 |
| P62241 | 442470      | 35924,01193 | 481436,6667 | 13074,53292 | 481183,3333 | 5042,63269  | 457686,6667 | 15033,27014 | 483983,3333  | 45152,88707 | 550570      | 39578,43142 |
| P62244 | 85656,66667 | 12698,49236 | 77779       | 2478,461687 | 87204,66667 | 4930,177729 | 67669       | 1211,439364 | 63193,66667  | 4981,153057 | 81019,66667 | 9787,59147  |
| P62249 | 577756,6667 | 25556,87796 | 461150      | 7581,723639 | 485333,3333 | 16086,85212 | 621690      | 12519,86555 | 582713,3333  | 20696,91308 | 617063,3333 | 10696,43295 |
| P62258 | 819710      | 145698,7942 | 862930      | 99622,35342 | 920676,6667 | 21493,6435  | 871496,6667 | 56161,75874 | 760626,6667  | 123424,5142 | 912200      | 4875,790534 |
| P62263 | 433013,3333 | 24719,68873 | 622923,3333 | 23476,26769 | 482283,3333 | 13096,88173 | 457093,3333 | 19288,20912 | 497196,6667  | 43837,41793 | 480246,6667 | 13133,64932 |
| P62266 | 36037       | 4336,427908 | 43431,33333 | 1779,10861  | 50327       | 3761,69009  | 50318,33333 | 7429,062981 | 38207,33333  | 3351,984603 | 40390,33333 | 6497,973847 |
| P62269 | 563203,3333 | 49839,03735 | 578746,6667 | 15754,94243 | 533490      | 16037,36055 | 729830      | 52393,48178 | 641706,6667  | 77600,24084 | 667700      | 31949,34167 |
| P62277 | 169213,3333 | 13547,89077 | 124643,3333 | 4440,905814 | 212973,3333 | 12418,4813  | 185496,6667 | 1582,76481  | 164026,6667  | 10523,80529 | 177373,3333 | 6023,881178 |
| P62280 | 66649       | 4050,075596 | 55120,66667 | 3142,043991 | 87617,33333 | 13248,99545 | 58696       | 6312,681311 | 71993,66667  | 6112,920588 | 83543,33333 | 6165,733001 |
| P62312 | 27841,33333 | 1993,680544 | 17409       | 1969,042745 | 13619       | 8546,53616  | 20054,66667 | 3919,418168 | 31469,66667  | 5652,656524 | 22216,66667 | 1901,465429 |
| P62314 | 31453,33333 | 4313,339979 | 33250,33333 | 4345,301575 | 533490      | 16037,36055 | 729830      | 52393,48178 | 641706,6667  | 77600,24084 | 667700      | 31949,34167 |
| P62318 | 82576       | 8667,539674 | 87860,33333 | 6531,467225 | 90614,33333 | 13164,26431 | 68845       | 4161,563769 | 77579,66667  | 10610,88902 | 95992,66667 | 6477,590322 |
| P62330 | 65354,33333 | 8216,146894 | 45471       | 2679,610233 | 70445,66667 | 8263,137849 | 30545,33333 | 8765,253321 | 89453,33333  | 2503,134191 | 65059       | 8147,555359 |
| P62333 | 136082,3333 | 18255,11112 | 133363,3333 | 1564,207289 | 192020      | 15082,97163 | 224096,6667 | 13956,52934 | 194893,3333  | 7419,263965 | 178113,3333 | 9255,748364 |
| P62424 | 458120      | 12888,80134 | 529293,3333 | 14091,95318 | 477853,3333 | 10607,57172 | 520046,6667 | 31002,94681 | 546503,3333  | 25681,26771 | 463896,6667 | 22820,26317 |
| P62495 | 63556       | 5902,885057 | 61038       | 3777,972472 | 72233,66667 | 3599,105506 | 73952,66667 | 6564,947736 | 77280,66667  | 7585,206135 | 70058,33333 | 9776,977998 |
| P62701 | 589573,3333 | 12987,32758 | 475733,3333 | 58390,77905 | 572400      | 26206,52654 | 579296,6667 | 7430,850856 | 584896,6667  | 42262,25043 | 648023,3333 | 19635,48856 |
| P62750 | 176433,3333 | 8032,478516 | 224373,3333 | 12267,80928 | 198986,6667 | 15949,94915 | 179260      | 3061,486567 | 197006,6667  | 19939,28813 | 215176,6667 | 24216,02867 |
| P62753 | 476580      | 58549,11215 | 494873,3333 | 23086,41183 | 469656,6667 | 52634,00812 | 535816,6667 | 34803,23947 | 483280       | 49013,01596 | 470113,3333 | 59757,88102 |
| P62805 | 3194166,667 | 165202,8484 | 6997366,667 | 187429,8565 | 3659433,333 | 105530,7907 | 3631433,333 | 148316,7369 | 3020066,667  | 92368,12822 | 3475800     | 26165,11609 |
| P62820 | 222763,3333 | 6428,956197 | 241420      | 9886,436837 | 219070      | 259,293913  | 241193,3333 | 6539,022183 | 217053,3333  | 12607,92652 | 278780      | 14926,28666 |
| P62826 | 886186,6667 | 10879,0691  | 744763,3333 | 27789,42505 | 903913,3333 | 11132,61624 | 849406,6667 | 28505,54176 | 855366,6667  | 38300,67899 | 1004250     | 27843,26669 |
| P62829 | 52223,33333 | 27581,31254 | 64953,66667 | 32478,65926 | 176676,6667 | 7195,964919 | 125063,3333 | 17279,68203 | 102541,3333  | 4611,917365 | 134626,6667 | 14622,0317  |
| P62847 | 43096,33333 | 4349,572252 | 7374,166667 | 742,8954039 | 84763,33333 | 7743,699403 | 22365,33333 | 4089,10668  | 53082        | 5550,592881 | 63778       | 3257,41774  |
| P62851 | 852140      | 24147,52644 | 920556,6667 | 41153,47872 | 837486,6667 | 16027,35301 | 864350      | 15005,21243 | 877616,6667  | 30880,65972 | 860820      | 24697,02884 |
| P62873 | 100964,6667 | 4284,683004 | 118233,3333 | 8991,66713  | 123683,3333 | 4054,727008 | 103757,6667 | 5797,923661 | 83059,66667  | 5007,693758 | 132400      | 15144,1815  |
| P62879 | 64991,66667 | 11347,95561 | 83967,33333 | 5920,898308 | 97383,66667 | 5238,618849 | 81128,33333 | 7957,961723 | 59441        | 3318,118493 | 91165,66667 | 3493,891876 |
| P62888 | 279093,3333 | 48753,86355 | 282470      | 10132,81303 | 279453,3333 | 11804,7594  | 287816,6667 | 252960      | 15228,32047  | 13401,2773  | 321490      | 31272,75065 |
| P62906 | 40236,66667 | 929,0723569 | 21284,33333 | 3238,102445 | 50166       | 9120,622402 | 21354       | 2041,042462 | 36748        | 2305,567681 | 47313,33333 | 9183,205256 |
| P62910 | 18866,66667 | 9458,656306 | 36977,33333 | 5527,595147 | 40421,33333 | 2033,072907 | 48844,66667 | 7053,615487 | 34391,33333  | 3409,105471 | 39981,66667 | 2814,198307 |
| P62913 | 204366,6667 | 9522,118695 | 231820      | 2886,918773 | 216140      | 22949,37109 | 174600      | 13740,35055 | 187660       | 13613,03175 | 219290      | 15449,08088 |
| P62917 | 513526,6667 | 57721,10658 | 530840      | 55564,08462 | 599563,3333 | 24933,41823 | 506506,6667 | 18930,00998 | 498230       | 44618,55705 | 530036,6667 | 49673,07296 |
| P62937 | 1941766,667 | 125549,0121 | 1774700     | 67983,55193 | 1844733,333 | 124679,8879 | 1949800     | 17506,09418 | 1933600      | 109699,6506 | 1806700     | 124052,9054 |
| P62942 | 104735      | 10391,98048 | 110826,6667 | 3532,800274 | 73221       | 950,6631019 | 93094       | 6944,20977  | 111156,6667  | 5807,151721 | 86031,66667 | 10596,37372 |
| P62987 | 1724600     | 70067,77671 | 1529633,333 | 9185,556295 | 1538266,667 | 68477,49833 | 1945133,333 | 21432,24466 | 1552933,333  | 62856,0348  | 1484033,333 | 27783,46831 |
| P62993 | 7466,733333 | 894,3353814 | 1560,533333 | 1560,533333 | 10192,03333 | 1252,22534  | 6075,3      | 265,7623249 | 11653,86667  | 1929,941351 | 9441,366667 | 245,3528366 |
| P63000 | 475250      | 19367,5846  | 475463,3333 | 15141,97514 | 432573,3333 | 10505,11833 | 4771440     | 14591,25423 | 458950       | 25844,07153 | 458213,3333 | 18381,02675 |
| P63010 | 777043,3333 | 143498,3421 | 544963,3333 | 4217,662596 | 825246,6667 | 37263,99819 | 669693,3333 | 38411,10705 | 580893,3333  | 12022,72062 | 696363,3333 | 102111,5505 |
| P63092 | 147376,6667 | 5937,143907 | 104823,3333 | 5639,86505  | 136753,3333 | 14904,00543 | 167173,3333 | 15646,28319 | 152910       | 9771,229878 | 144336,6667 | 24972,95893 |
| P63104 | 1792033,333 | 33473,83721 | 1880833,333 | 135836,1309 | 1874033,333 | 37818,17611 | 2021533,333 | 28046,7665  | 1798166,667  | 82652,33075 | 1707300     | 69891,2727  |
| P63167 | 98961       | 15735,29264 | 88896,66667 | 6257,735329 | 103641,6667 | 11689,44872 | 109708      | 7249,44945  | 98743,33333  | 2281,353205 | 105580,6667 | 13068,34987 |
| P63173 | 10456,66667 | 1789,883461 | 2713,833333 | 2713,833333 | 4071,666667 | 4071,666667 | 7598        | 718,3080328 | 14056,33333  | 2018,155291 | 12533,33333 | 604,6184288 |
| P63241 | 207170      | 28942,56439 | 68294,66667 | 5541,608982 | 215373,3333 | 18253,41642 | 151473,3333 | 4774,296923 | 179360       | 4310,467879 | 202506,6667 | 14527,46403 |
| P63244 | 845866,6667 | 39197,39972 | 719963,3333 | 18773,25166 | 880036,6667 | 48171,79823 | 951193,3333 | 3460,993756 | 935260       | 46343,03831 | 927626,6667 | 37909,35211 |
| P67775 | 163430      | 5482,39911  | 123156,6667 | 10906,14862 | 151286,6667 | 1097,578142 | 134730,3333 | 14416,69441 | 134730       | 6891,21905  | 136286,6667 | 5337,669071 |
| P67812 | 114473,3333 | 8150,603931 | 87232,33333 | 3497,918445 | 116679      | 9444,349334 | 145596,6667 | 7949,960866 | 125860       | 8815,276513 | 121323,3333 | 8994,928818 |
| P67936 | 723396,6667 | 25285,09728 | 603023,3333 | 96018,6722  | 894243,3333 | 122193,0694 | 901803,3333 | 120190,0468 | 890633,3333  | 126796,8256 | 908880      | 73748,01489 |
| P68036 | 75893       | 3538,41716  | 61198       | 3128,490104 | 67240       | 4217,882407 | 64165,33333 | 5113,860262 | 86041        | 2926,670008 | 65528,33333 | 2522,206331 |
| P68104 | 3854766,667 | 258081,5397 | 2842633,333 | 147202,0984 | 3367133,333 | 195261,3832 | 3609133,333 | 84820,01205 | 3589566,667  | 152078,2839 | 4406400     | 352256,6725 |
| P68133 | 7923400     | 483571,7148 | 8607333,333 | 601147,4704 | 7528066,667 | 397112,7562 | 6997366,667 | 391239,264  | 6731766,667  | 371239,264  | 8003200     | 547270,1435 |
| P68366 | 1532266,667 | 147500,1168 | 1479666,667 | 50146,4965  | 1946533,333 | 80728,27537 | 1747733,333 | 152753,8361 | 1902966,667  | 98148,61747 | 1630166,667 | 148645,858  |
| P68371 | 430546,6667 | 33078,76929 | 505306,6667 | 20596,85602 | 406026,6667 | 19213,15637 | 472793,3333 | 47049,7518  | 521846,6667  | 62313,42989 | 368200      | 17911,97737 |
| P68402 | 232396,6667 | 8049,605235 | 90363       | 7799,560436 | 212546,6667 | 6543,679733 | 171326,6667 | 19869,79729 | 224566,6667  | 6565,450818 | 234490      | 13534,15802 |
| P68871 | 2793833,333 | 201960,1391 | 692210      | 22348,6107  | 1868600     | 133436,177  | 1056196,667 | 39134,34567 | 3198766,667  | 189813,1479 | 2432966,667 | 59815,3362  |
| P69905 | 16853333,33 | 1564552,794 | 9460900     | 586810,3981 | 9596166,667 | 94419,88373 | 9363200     | 268245,9879 | 17462333,333 | 984959,6156 | 12066333,33 | 524674,6082 |
| P78344 | 70044,66667 | 6823,552382 | 44125,66667 | 5737,450489 | 57716,66667 | 8726,051901 | 56362,33333 | 7217,791729 | 64280,33333  | 7714,33411  | 59792       | 5568,05795  |
| P78371 | 592243,3333 | 34444,21593 | 510093,3333 | 19076,27264 | 520493,3333 | 5027,074475 | 645273,3333 | 13201,73768 | 582520       | 33805,14359 | 562830      | 17570,01518 |
| P78417 | 1254700     | 22626,60676 | 1309766,667 | 67863,4495  | 1443133,333 | 38990,1412  | 1558466,667 | 26415,29439 | 1481966,667  | 31808,4021  | 1424266,667 | 30990,82301 |
| P78527 | 416073,3333 | 20477,81347 | 482976,6667 | 14987,20491 | 446703,3333 | 28562,90854 | 451996,6667 | 16703,028   | 455400       | 23478,42911 | 494963,3333 | 9240,054714 |
| P84077 | 70519,33333 | 5401,132515 | 51855       | 725,6840451 | 65687,33333 | 3261,47637  | 564         |             |              |             |             |             |

|        |             |             |             |             |              |             |             |             |             |             |             |             |
|--------|-------------|-------------|-------------|-------------|--------------|-------------|-------------|-------------|-------------|-------------|-------------|-------------|
| P98066 | 83173,66667 | 7741,382571 | 36422,33333 | 12879,95264 | 52601        | 6087,973746 | 65833,33333 | 4226,151138 | 78907,66667 | 5272,996123 | 66608,66667 | 1380,836743 |
| P98082 | 221170      | 6380,493711 | 190780      | 10647,02932 | 197186,66667 | 7917,748698 | 189630      | 311,9294792 | 163170      | 8043,483905 | 186513,3333 | 4151,442855 |
| P99999 | 90143,66667 | 9435,749967 | 77523       | 2896,599213 | 102391       | 10135,78879 | 123543,3333 | 2934,42404  | 106444,6667 | 12692,67414 | 93467       | 12656,24835 |
| Q00325 | 542410      | 60633,8621  | 582313,3333 | 17914,29814 | 462830       | 17539,7957  | 623870      | 30440,73313 | 522713,3333 | 20851,35674 | 578463,3333 | 46174,79628 |
| Q00341 | 539580      | 63569,92056 | 381790      | 8415,099524 | 460280       | 12717,99644 | 455550      | 17144,75236 | 576943,3333 | 36525,97721 | 555343,3333 | 21052,60105 |
| Q00610 | 4059200     | 97313,42833 | 3302833,333 | 103734,3134 | 2750600      | 50403,80277 | 3601600     | 112632,1594 | 3352600     | 104718,8776 | 3824033,333 | 44923,87388 |
| Q00688 | 60163       | 8735,014158 | 58215,66667 | 5795,78825  | 75592        | 3314,616318 | 60807       | 4990,563328 | 79596,33333 | 8449,643076 | 60024,66667 | 11726,54791 |
| Q00765 | 133796,6667 | 9203,595916 | 80850,66667 | 34868,10593 | 174163,3333  | 15998,95865 | 136086,6667 | 5129,218047 | 127560      | 5397,335763 | 139646,6667 | 6493,418035 |
| Q00796 | 41495,66667 | 7251,691511 | 49435,66667 | 11647,66249 | 38309        | 2438,669924 | 53523       | 7696,708994 | 65905       | 25111,78721 | 48925,66667 | 34218,3604  |
| Q00839 | 84081,33333 | 33679,45455 | 93205       | 18618,51252 | 39372,33333  | 9275,131919 | 110643,6667 | 15141,68806 | 78386       | 16692,81894 | 85795,66667 | 17897,16082 |
| Q01082 | 537503,3333 | 13045,90911 | 481086,6667 | 46188,8321  | 521440       | 36319,83067 | 436476,6667 | 26870,41827 | 501303,3333 | 43392,63238 | 506920      | 13571,44183 |
| Q01105 | 33439       | 1130,306301 | 32955,66667 | 2839,726826 | 31809,66667  | 865,594465  | 28078       | 3614,079689 | 30327,33333 | 20688       | 31863       | 2009,217343 |
| Q01518 | 578476,6667 | 44593,78183 | 578363,3333 | 29658,94207 | 485483,3333  | 38541,1271  | 443310      | 24149,04208 | 491990      | 53425,56411 | 539200      | 37260,33593 |
| Q01650 | 12134,66667 | 6359,963583 | 18628,33333 | 2016,165447 | 6608,366667  | 3387,139585 | 5155,666667 | 15141,68806 | 17841,66667 | 636,8925428 | 11979       | 6021,89923  |
| Q01813 | 277526,6667 | 15498,3336  | 225650      | 1424,967836 | 238586,6667  | 7337,868295 | 9265,666613 | 237686,6667 | 327686,6667 | 280956,6667 | 13362,2632  |             |
| Q01844 | 45064       | 13268,37376 | 139253,3333 | 7590,50357  | 36259,66667  | 18767,36581 | 47605,66667 | 1300,465729 | 47060       | 5136,673664 | 20374,33333 | 1024,013726 |
| Q01995 | 886260      | 23412,56571 | 745653,3333 | 6813,29664  | 664970       | 24070,65087 | 637260      | 22825,30467 | 753723,3333 | 26744,10859 | 810170      | 20862,8913  |
| Q02218 | 128093,6667 | 14169,27427 | 89859,33333 | 6906,334998 | 119720       | 3078,246254 | 110883,3333 | 4760,428319 | 121836,6667 | 6532,208236 | 123176,6667 | 4005,289558 |
| Q02543 | 69257,66667 | 6566,577427 | 111073,3333 | 4746,754447 | 97937        | 3838,948076 | 81387,66667 | 8050,927096 | 75301,66667 | 3771,499275 | 89930,66667 | 3424,670609 |
| Q02809 | 11496,76667 | 8471,398615 | 9310,666667 | 4675,642606 | 7596,566667  | 3985,722873 | 9991,8      | 3413,930234 | 0           | 0           | 10557       | 6101,44756  |
| Q02878 | 826463,3333 | 29013,37986 | 1043530     | 29626,3942  | 970050       | 27073,59045 | 870900      | 24200,50206 | 825950      | 31130,38762 | 756553,3333 | 33175,64987 |
| Q02952 | 16665       | 658,2621059 | 23639       | 1946,624343 | 17704        | 1618,718938 | 17361,33333 | 2171,899501 | 15241,66667 | 3817,521549 | 9203,2      | 3603,749366 |
| Q02978 | 62645,33333 | 2701,229741 | 26976,66667 | 388,8943015 | 47283        | 1566,098443 | 39706,33333 | 1239,276178 | 59559,66667 | 2236,032896 | 65584,33333 | 6525,755711 |
| Q03135 | 520470      | 37856,03915 | 449703,3333 | 32645,47663 | 415666,6667  | 7668,205643 | 535296,6667 | 16927,23086 | 417610      | 27380,7968  | 514890      | 38788,13264 |
| Q03169 | 55436       | 22002,56594 | 19002,66667 | 1263,112338 | 107689,6667  | 12286,23037 | 89311,66667 | 8805,544131 | 119051,6667 | 11409,05501 | 62707,33333 | 15624,14708 |
| Q03252 | 44819,33333 | 2144,576441 | 97963,33333 | 21309,7711  | 73011,66667  | 16308,35302 | 94336,66667 | 25696,69611 | 87255       | 6014,044341 | 99404,66667 | 5150,992989 |
| Q04446 | 723856,6667 | 59863,335   | 445700      | 34216,28462 | 711616,6667  | 23933,47052 | 622153,3333 | 39630,6705  | 668280      | 13491,66533 | 728666,6667 | 84699,33222 |
| Q04637 | 172613,3333 | 12221,69701 | 156216,6667 | 10446,7608  | 187220       | 10616,3192  | 159600      | 13105,55735 | 177390      | 18321,22903 | 167863,3333 | 9115,739746 |
| Q04760 | 42720,33333 | 14028,87808 | 50726,66667 | 3923,732251 | 36252,66667  | 3634,212172 | 33387,66667 | 2720,547882 | 51482,33333 | 4572,392602 | 17790,33333 | 9587,856492 |
| Q04917 | 51161       | 4205,930614 | 54754,66667 | 5989,398254 | 49177        | 3108,822768 | 41484,33333 | 2346,052169 | 62740       | 6635,326995 | 51832       | 3946,813778 |
| Q05682 | 1204033,333 | 37262,9545  | 1224266,667 | 5899,246656 | 799223,3333  | 23194,82437 | 1010970     | 957106,6667 | 34120,43718 | 54571,64231 | 1015480     | 20293,16141 |
| Q06033 | 25084,66667 | 25084,66667 | 0           | 0           | 15322        | 15322       | 57262,33333 | 7319,146247 | 13121       | 13121       | 0           | 0           |
| Q06210 | 206146,6667 | 28115,391   | 221440      | 871,2251909 | 221336,6667  | 41092,58219 | 212906,6667 | 5252,064144 | 243526,6667 | 5939,338721 | 267960      | 5757,421298 |
| Q06323 | 43168       | 1352,35942  | 14265,66667 | 1145,077047 | 56746        | 1165,510332 | 30709,66667 | 1169,985945 | 58056       | 5048,373434 | 43007,66667 | 2437,565885 |
| Q06830 | 2026300     | 71398,6928  | 2256400     | 138117,9327 | 2430500      | 99065,02915 | 2227933,333 | 69909,87849 | 2617066,667 | 38462,46366 | 2149033,333 | 80993,9161  |
| Q07020 | 267053,3333 | 35271,32657 | 362883,3333 | 29323,89375 | 311530       | 58961,51824 | 344893,3333 | 23035,53583 | 106490,3333 | 57097,38197 | 341070      | 47454,56037 |
| Q07065 | 1531400     | 125878,8836 | 1255233,333 | 30733,17064 | 1854833,333  | 48912,72273 | 1715633,333 | 110360,173  | 1744333,333 | 18238,63421 | 1440966,667 | 80849,66158 |
| Q07666 | 30366,86667 | 11934,67037 | 21561,33333 | 10789,87651 | 29515        | 5197,727292 | 35791,66667 | 3975,725734 | 48688,33333 | 1109,64624  | 40576       | 2826,688227 |
| Q07812 | 121609,3333 | 20322,28532 | 119208,6667 | 14843,00088 | 136381       | 21481,24704 | 122721,6667 | 28314,98813 | 152866,6667 | 18313,21047 | 122126,6667 | 9943,246177 |
| Q07866 | 146162,6667 | 52494,82921 | 52827       | 4764,307435 | 164551,3333  | 48098,92689 | 127739,6667 | 38628,90192 | 149594,6667 | 44901,8106  | 62937       | 7664,042428 |
| Q07954 | 201576,6667 | 25911,20371 | 244740      | 30087,17833 | 192286,6667  | 20963,82148 | 199913,3333 | 24682,95656 | 264400      | 7687,140778 | 198156,6667 | 22499,57728 |
| Q07955 | 53339       | 1361,659649 | 56572,33333 | 2667,412625 | 57549,66667  | 5389,907121 | 61051,33333 | 3676,757826 | 58653,66667 | 3509,208141 | 59422,33333 | 5015,546542 |
| Q07960 | 478456,6667 | 38260,07856 | 343870      | 40696,97081 | 503466,6667  | 24241,40352 | 418600      | 11328,29349 | 494376,6667 | 16086,00876 | 474900      | 12808,95293 |
| Q08211 | 364863,3333 | 31431,73255 | 355736,6667 | 46121,26853 | 304920       | 13531,59759 | 349983,3333 | 8003,295849 | 413466,6667 | 28867,3035  | 408013,3333 | 28664,51077 |
| Q08257 | 3672,666667 | 3672,666667 | 0           | 0           | 4968,333333  | 4968,333333 | 5908,333333 | 5914,473333 | 5770,368208 | 4905,333333 | 4905,333333 | 4905,333333 |
| Q08431 | 263930      | 16455,25144 | 121896,6667 | 13463,53264 | 226280       | 25773,85497 | 159570      | 9274,682384 | 229726,6667 | 13504,08128 | 223873,3333 | 21267,9997  |
| Q09666 | 2628900     | 78769,34683 | 3080700     | 74715,81716 | 2548233,333  | 62170,52714 | 2619533,333 | 12156,52545 | 3464066,667 | 59339,76557 | 2669866,667 | 10500,84653 |
| Q10471 | 43052       | 12393,75976 | 54098,33333 | 4682,942463 | 76899,33333  | 6805,991094 | 74047,66667 | 1385,602917 | 90722,66667 | 8512,08007  | 57563,66667 | 7317,223343 |
| Q12765 | 39182,66667 | 5548,16325  | 44757,66667 | 6002,227818 | 31995,33333  | 2802,255599 | 39547       | 2642,555644 | 38204,66667 | 2305,139644 | 36957,66667 | 4357,822558 |
| Q12768 | 18249       | 1141,673771 | 23503,33333 | 1506,529603 | 19643,33333  | 3593,009803 | 18672,66667 | 2631,125256 | 18958,33333 | 857,765767  | 19259,66667 | 713,7908969 |
| Q12792 | 76409,33333 | 8512,791441 | 55681,66667 | 6834,708975 | 56725,66667  | 2546,548274 | 37178,66667 | 1303,65695  | 55183,66667 | 10499,9528  | 63432,33333 | 4670,711664 |
| Q12884 | 204703,3333 | 20874,11901 | 190156,6667 | 1283,554094 | 136936,6667  | 9729,269129 | 205050      | 12687,51092 | 211770      | 11326,18353 | 182183,3333 | 25438,64077 |
| Q12905 | 50895,33333 | 4508,17333  | 71409       | 2791,624437 | 70373,66667  | 5222,350184 | 69685       | 7693,770727 | 58172,33333 | 683,6564277 | 60893       | 8769,155395 |
| Q12906 | 118063      | 12327,95924 | 114343,6667 | 8461,667494 | 104636,3333  | 3990,397655 | 123996,6667 | 5388,460922 | 129396,6667 | 4447,472441 | 103016,3333 | 17761,15021 |
| Q12907 | 172880      | 16723,16457 | 175070      | 9096,748503 | 163900       | 6736,544614 | 211336,6667 | 8826,279574 | 190760      | 30124,70138 | 170386,6667 | 16157,45476 |
| Q12965 | 42079,66667 | 4876,957943 | 26640       | 2846,505401 | 36625        | 2615,089737 | 26900       | 3407,143525 | 36855       | 5770,815194 | 36343,66667 | 3705,093086 |
| Q13011 | 0           | 0           | 12726,33333 | 554,3766269 | 0            | 0           | 2096,433333 | 2096,433333 | 5008,733333 | 3570,487344 | 8130,666667 | 8130,666667 |
| Q13045 | 85403,66667 | 8109,419879 | 58791,66667 | 14118,33931 | 97330        | 6927,722954 | 72584       | 4866,81429  | 96729,66667 | 9144,181945 | 100680,3333 | 5060,663867 |
| Q13103 | 119073,3333 | 8059,934519 | 102849,6667 | 9594,827779 | 111985,33333 | 7304,265999 | 131380      | 5995,034056 | 131486,6667 | 14396,40735 | 118910      | 6819,904691 |
| Q13131 | 115349,6667 | 36984,98051 | 99071,33333 | 16423,25508 | 120978,6667  | 18235,97384 | 158753,3333 | 7040,417443 | 114088      | 12200,43021 | 103207,3333 | 29265,198   |
| Q13148 | 30259,66667 | 2322,906608 | 27863,33333 | 1606,304281 | 30867,33333  | 5574,80476  | 25753,66667 | 2778,806478 | 28776       | 1592,684631 | 34838,66667 | 3799,237394 |
| Q13151 | 117663,3333 | 9294,961598 | 85752,33333 | 9302,813308 | 86890,33333  | 1040,24041  | 106237      | 11525,78424 | 83766,66667 | 9639,733214 | 106606,3333 | 9630,009352 |
| Q13155 | 40939       | 2089,444184 | 14882       | 800,3280577 | 47016        | 701,5789335 | 36028,66667 | 1591,448118 | 45198       | 5171,673262 | 43532,33333 | 4173,785026 |
| Q13162 | 768760      | 13863,21151 | 738446,6667 | 23258,1171  | 805983,3333  | 36721,5633  | 755806,6667 | 28470,16587 | 786         |             |             |             |

|        |               |             |             |             |             |             |             |             |             |             |             |             |
|--------|---------------|-------------|-------------|-------------|-------------|-------------|-------------|-------------|-------------|-------------|-------------|-------------|
| Q13177 | 78045,33333   | 8319,824564 | 75037,66667 | 3456,363423 | 80533       | 2328,143108 | 55170,33333 | 13093,52367 | 67709       | 15866,38996 | 73714,33333 | 9193,858917 |
| Q13200 | 856020        | 39830,52389 | 839776,6667 | 53140,09953 | 877540      | 27086,59632 | 750473,3333 | 131951,6599 | 872856,6667 | 4463,277321 | 900796,6667 | 47626,758   |
| Q13228 | 854080        | 17562,88511 | 784423,3333 | 19366,17785 | 686656,6667 | 6962,83547  | 708456,6667 | 16260,36319 | 769213,3333 | 31839,89862 | 829343,3333 | 13124,86741 |
| Q13286 | 19336         | 1761,176974 | 11265,83333 | 4411,586452 | 1397,333333 | 930,0940621 | 24172       | 775,3270278 | 15423       | 2580,606582 | 10662       | 5441,762796 |
| Q13310 | 90987         | 9578,55986  | 63414,66667 | 4533,263774 | 88747       | 2129,730578 | 98384,33333 | 2442,385878 | 71867,66667 | 7647,782278 | 76705,66667 | 7125,832591 |
| Q13325 | 12922,66667   | 2334,356895 | 4573,966667 | 1395,981077 | 23006,33333 | 2374,152785 | 17594       | 1338,782034 | 19372,33333 | 1552,697474 | 14251       | 1828,861899 |
| Q13347 | 77477,66667   | 17065,39514 | 73445,33333 | 73445,33333 | 9484,95873  | 73135,66667 | 8084,859189 | 61675,66667 | 18504,40143 | 84948,66667 | 12267,824   | 9044,022999 |
| Q13418 | 13165         | 1219,729615 | 12461,66667 | 1212,897678 | 8193,833333 | 1164,892988 | 7281,566667 | 468,0251465 | 10036,13333 | 1115,668417 | 8039,6      | 1688,349873 |
| Q13423 | 107433,3333   | 6444,698941 | 83871       | 5871,241691 | 96146       | 1229,193367 | 121540      | 8421,472555 | 108486,3333 | 6963,819841 | 109568      | 15920,49297 |
| Q13425 | 85283,66667   | 5182,588071 | 74144,66667 | 7780,396741 | 72015,33333 | 7179,945783 | 86388,66667 | 8347,930808 | 77820       | 4584,360188 | 80900       | 4136,605533 |
| Q13488 | 32448         | 3377,700451 | 29423,33333 | 2262,333628 | 23739,66667 | 1311,707962 | 35368       | 2189,060605 | 15345,33333 | 7728,698086 | 36965,33333 | 1872,668892 |
| Q13492 | 37980         | 2665,653078 | 37849,66667 | 2305,365216 | 26550,33333 | 3566,448202 | 29968       | 2386,44722  | 33330,66667 | 4817,536934 | 26694,33333 | 13369,7202  |
| Q13501 | 5993,2        | 1292,28519  | 6564,533333 | 1144,38906  | 8819,533333 | 688,0718406 | 10352       | 825,2036436 | 8441,733333 | 554,1476859 | 7216        | 827,1034357 |
| Q13510 | 599620        | 21987,38729 | 470596,6667 | 17779,51099 | 498633,3333 | 22426,16057 | 528953,3333 | 19574,74081 | 507503,3333 | 23937,63866 | 527993,3333 | 15398,28381 |
| Q13557 | 273133,3333   | 11482,64826 | 240670      | 1356,257104 | 243490      | 14321,99125 | 250833,3333 | 9379,25074  | 226526,6667 | 4505,405399 | 249626,6667 | 21803,80726 |
| Q13596 | 32357,33333   | 2349,340428 | 36836       | 1994,03243  | 33133       | 2751,038774 | 34875,66667 | 1877,338926 | 24540,6     | 7388,89738  | 34708,33333 | 989,4227835 |
| Q13620 | 67335,66667   | 6311,953906 | 28692,66667 | 1583,326702 | 58900,66667 | 1036,502184 | 29234       | 2047,33412  | 58748       | 6113,345265 | 62088,66667 | 4159,408465 |
| Q13642 | 834720        | 22852,69422 | 891083,3333 | 15328,87725 | 565433,3333 | 15051,9039  | 653743,3333 | 17765,37675 | 614823,3333 | 25654,03953 | 850230      | 6633,598822 |
| Q13724 | 94187,33333   | 21896,74626 | 62569       | 6589,113825 | 102647      | 12789,38123 | 67825,33333 | 5946,133935 | 76384       | 9065,388923 | 91652       | 16577,39598 |
| Q13813 | 576643,3333   | 25880,21789 | 505393,3333 | 30918,00249 | 636866,6667 | 19321,32278 | 628200      | 9133,608268 | 566593,3333 | 36537,4987  | 562053,3333 | 21740,56909 |
| Q13838 | 238050        | 27124,93748 | 180680      | 19938,5715  | 217116,6667 | 9229,132016 | 199986,6667 | 14265,52293 | 238466,6667 | 10249,07855 | 199870      | 10434,44935 |
| Q13885 | 80872,33333   | 5299,827681 | 85696,66667 | 6555,408691 | 110113,3333 | 2263,25233  | 89574,33333 | 9410,228058 | 71277,33333 | 4115,286962 | 88517,66667 | 6881,39042  |
| Q14019 | 55285,33333   | 141,4512087 | 24012       | 758,7465541 | 69027,33333 | 4212,537095 | 31227,66667 | 3341,993883 | 64647,33333 | 2767,818475 | 56548,66667 | 3343,740886 |
| Q14103 | 687736,6667   | 34060,54283 | 417896,6667 | 22281,38037 | 665550      | 27594,1739  | 540240      | 18299,75228 | 613736,6667 | 47894,33938 | 669910      | 19196,52399 |
| Q14108 | 1186600       | 21973,01375 | 1114633,333 | 15024,12874 | 1017606,667 | 46008,30408 | 1189200     | 19747,65809 | 1072700     | 44306,77149 | 1071870     | 54568,5187  |
| Q14152 | 357406,6667   | 8296,136316 | 300470      | 4880,06489  | 381113,3333 | 21319,34437 | 389080      | 8480,188994 | 394813,3333 | 10325,69664 | 383253,3333 | 10521,40253 |
| Q14157 | 21112,66667   | 4156,036988 | 17779,33333 | 1090,206301 | 23205,33333 | 1110,979198 | 16149,33333 | 1988,379603 | 18749       | 1060,326365 | 13785,33333 | 2038,56341  |
| Q14195 | 269503,3333   | 5810,944655 | 264156,6667 | 5410,071883 | 277706,6667 | 15092,26108 | 254573,3333 | 4657,518414 | 258486,6667 | 4189,134092 | 276796,6667 | 15565,3347  |
| Q14203 | 272740        | 80301,96075 | 469390      | 14010,29265 | 393930      | 23297,3668  | 358603,3333 | 7124,919493 | 284270      | 89733,52012 | 283333,3333 | 86694,90591 |
| Q14204 | 952480        | 37810,01102 | 958990      | 136232,5851 | 825966,6667 | 158657,3517 | 828430      | 55377,15865 | 866186,6667 | 34030,87438 | 1111033,333 | 198491,0575 |
| Q14240 | 241240        | 24061,46574 | 218273,3333 | 13183,44964 | 243120      | 16983,21034 | 267680      | 16472,92425 | 293400      | 12989,03512 | 237153,3333 | 32475,37135 |
| Q14247 | 214873,3333   | 3690,855065 | 244900      | 4628,621105 | 186066,6667 | 9494,809693 | 205080      | 4002,986385 | 186333,3333 | 5001,720815 | 190170      | 7151,21668  |
| Q14254 | 21041,33333   | 452,8334253 | 19024,33333 | 843,3870866 | 12994       | 6521,241088 | 19326,33333 | 1389,14846  | 18003,66667 | 2742,967149 | 22299,33333 | 3045,659334 |
| Q14258 | 20379,33333   | 5644,476041 | 24016,4     | 9914,618908 | 25710,66667 | 4776,333892 | 33364,33333 | 2963,051936 | 26713       | 7176,161399 | 15837,66667 | 7927,761692 |
| Q14315 | 134174        | 31650,09883 | 108509      | 35378,4353  | 132985,3333 | 49610,25239 | 181040      | 12302,88178 | 174040      | 6866,180403 | 47768       | 16031,51616 |
| Q14498 | 15057,33333   | 7763,03863  | 27773,66667 | 2753,630593 | 21356,33333 | 4422,635501 | 19800       | 506,5188381 | 24255,66667 | 3956,714813 | 20608,66667 | 2801,458925 |
| Q14554 | 43144,33333   | 3874,821559 | 31482       | 2315,202799 | 49193,66667 | 1932,686587 | 39739,33333 | 627,067868  | 31670       | 2025,779438 | 40375,33333 | 4313,378271 |
| Q14696 | 37117,33333   | 19278,13696 | 7917,966667 | 4804,920211 | 40874,33333 | 14955,15934 | 6985,366667 | 4911,898357 | 30119,66667 | 11603,78608 | 13587,33333 | 13587,33333 |
| Q14697 | 1711133,333   | 15442,6178  | 1350666,667 | 47133,33333 | 1829633,333 | 61517,59459 | 1728833,333 | 31872,99449 | 1795533,333 | 55063,76102 | 1762500     | 45422,60817 |
| Q14764 | 1547400       | 38711,36784 | 1383566,667 | 14728,01563 | 1204466,667 | 6915,280986 | 1526700     | 23135,03896 | 1424633,333 | 36111,69401 | 1508233,333 | 18858,62608 |
| Q14847 | 206606,6667   | 18652,84101 | 218690      | 13132,83798 | 188343,3333 | 7036,704563 | 195106,6667 | 14713,48626 | 185186,6667 | 20887,42551 | 178580      | 5695,024144 |
| Q14956 | 760926,6667   | 77251,67578 | 762750      | 61708,45242 | 573253,3333 | 46154,11731 | 922426,6667 | 30495,2796  | 571783,3333 | 41574,08661 | 701076,6667 | 51383,33366 |
| Q14974 | 386863,3333   | 79422,40623 | 455670      | 54042,40958 | 386476,6667 | 5237,621385 | 477886,6667 | 20608,28016 | 432050      | 14766,42927 | 397333,3333 | 23826,65617 |
| Q15005 | 83636         | 14069,76476 | 70417       | 3749,36319  | 69217,33333 | 3186,678591 | 76100,33333 | 6137,742102 | 58272       | 4569,886031 | 79949,66667 | 5616,595604 |
| Q15008 | 321213,3333   | 10967,89912 | 250340      | 3625,194248 | 250756,6667 | 7234,261845 | 279956,6667 | 16344,75791 | 283900      | 28166,25877 | 288260      | 12383,99505 |
| Q15019 | 0             | 0           | 44856       | 325,0866551 | 58286       | 3778,572085 | 46742       | 2678,743238 | 32445       | 16222,69142 | 18067,33333 | 18067,33333 |
| Q15043 | 45227,33333   | 9024,463499 | 27731,66667 | 7268,127552 | 186720      | 24571,53095 | 282260      | 291,3760457 | 280126,6667 | 7118,523567 | 180090      | 29043,64015 |
| Q15046 | 111596        | 16350,07551 | 73482,33333 | 2776,184212 | 136534,6667 | 29012,3983  | 126583,3333 | 1535,755334 | 112458,3333 | 12966,64321 | 89324       | 12478,16675 |
| Q15075 | 250906,6667   | 23394,57012 | 309170      | 42086,34458 | 299273,3333 | 75504,72973 | 273403,3333 | 14703,39228 | 237280      | 31746,72319 | 214233,3333 | 11980,34826 |
| Q15084 | 1247166,667   | 28419,9656  | 1116700     | 41042,94499 | 1433800     | 92671,08503 | 1170933,333 | 31482,12897 | 1243066,667 | 55369,94773 | 1218666,667 | 55354,20289 |
| Q15149 | 2895533,333   | 118989,416  | 2951800     | 103511,5614 | 2468066,667 | 153445,3359 | 2830433,333 | 43516,06345 | 284976,667  | 93336,67256 | 2713500     | 85063,52528 |
| Q15155 | 26737,66667   | 3929,333333 | 17623,66667 | 992,2604385 | 24853,66667 | 2780,987255 | 20639,66667 | 1111,574309 | 30265,66667 | 1059,431032 | 32387,66667 | 2424,535717 |
| Q15181 | 229693,3333   | 12007,66746 | 177690      | 15913,22825 | 224120      | 4413,505787 | 260006,6667 | 280050      | 29038,57148 | 179126,6667 | 12402,85496 |             |
| Q15233 | 168870        | 29019,73524 | 143673,3333 | 21614,76759 | 122763,3333 | 6989,137604 | 190476,6667 | 10034,48111 | 157680      | 7821,37456  | 153736,6667 | 24912,07895 |
| Q15257 | 102233,3333   | 7269,035547 | 87619,33333 | 12616,07525 | 81802       | 9537,207296 | 76085,66667 | 4138,277513 | 90424       | 6495,724055 | 98303       | 9686,648492 |
| Q15365 | 423000        | 5585,913832 | 438726,6667 | 27104,29507 | 467960      | 10459,20806 | 459953,3333 | 31433,58996 | 341660      | 18065,16814 | 421663,3333 | 16375,20924 |
| Q15366 | 284820        | 8574,417376 | 307883,3333 | 24635,70196 | 272353,3333 | 20156,66749 | 314630      | 7100,42487  | 327276,6667 | 17252,39049 | 285283,3333 | 25772,03674 |
| Q15417 | 116314,6667   | 9099,508876 | 107608,6667 | 5886,465984 | 115506,6667 | 4665,141417 | 105914      | 4390,258459 | 108660,6667 | 15372,03852 | 100922      | 8986,964857 |
| Q15435 | 43142,66667   | 12255,56267 | 28036,33333 | 5619,734405 | 36642,66667 | 5230,113203 | 32207,33333 | 2778,631578 | 41513       | 12425,25304 | 36302,33333 | 6940,27032  |
| Q15436 | 206856,6667   | 7292,855713 | 173126,6667 | 15530,70543 | 193430      | 11376,51235 | 214313,3333 | 6159,562575 | 226456,6667 | 17188,73888 | 247443,3333 | 7687,137164 |
| Q15582 | 1401966,667   | 66371,68908 | 1581333,333 | 8804,796673 | 1496566,667 | 80206,32422 | 1355900     | 28651,41067 | 1246133,333 | 83686,58461 | 1271800     | 92889,84516 |
| Q15583 | 93872         | 14061,89807 | 108656      | 7314,483532 | 64293,33333 | 1983,517106 | 93881       | 2096,982833 | 108854,6667 | 8266,012447 | 82125,33333 | 684,2057033 |
| Q15629 | 235990        | 15448,55117 | 143679      | 35243,09806 | 65231,33333 | 7474,939673 | 208263,3333 | 7941,851869 | 119626,6667 | 42382,9862  | 193836,6667 | 2976,913017 |
| Q15631 | 60158,33333</ |             |             |             |             |             |             |             |             |             |             |             |

|        |             |              |             |             |             |             |             |             |             |             |             |             |
|--------|-------------|--------------|-------------|-------------|-------------|-------------|-------------|-------------|-------------|-------------|-------------|-------------|
| Q15758 | 48941,33333 | 8377,686123  | 33866,66667 | 3187,622747 | 37777       | 659,4310679 | 40262,33333 | 2324,379654 | 35506,33333 | 2499,065314 | 41170       | 1976,94613  |
| Q15907 | 403363,3333 | 12984,99947  | 383363,3333 | 21359,42597 | 393493,3333 | 13530,79245 | 496910      | 14573,19915 | 410156,6667 | 143,4495653 | 390636,6667 | 12239,66548 |
| Q15942 | 39913,66667 | 2363,514991  | 34113       | 2591,98116  | 30773       | 1927,422199 | 33073,66667 | 2262,417316 | 38693,33333 | 2472,968145 | 29433       | 1946,093609 |
| Q16181 | 103430,6667 | 11204,89788  | 127846,6667 | 5094,946298 | 85169       | 10346,41843 | 90495,66667 | 10399,9342  | 111380      | 3735,576707 | 110332,3333 | 8176,344055 |
| Q16222 | 5301,066667 | 3425,470839  | 1318,966667 | 1318,966667 | 8210,166667 | 866,3446972 | 1903,033333 | 1903,033333 | 7932,6      | 1566,637081 | 4097,033333 | 2150,325914 |
| Q16401 | 259700      | 24749,3239   | 240893,3333 | 18188,92093 | 216096,6667 | 6300,000882 | 210350      | 20634,16342 | 239230      | 33149,18149 | 203083,3333 | 10273,05916 |
| Q16531 | 88742,66667 | 3941,202876  | 193620      | 18535,84725 | 64425       | 8675,543921 | 66195,66667 | 2754,616993 | 77400       | 4658,943908 | 90160,66667 | 570,0132552 |
| Q16539 | 8333,733333 | 1320,589692  | 1160,15     | 812,8144822 | 2767,5      | 2767,5      | 142,3466667 | 142,3466667 | 6897,533333 | 813,1094849 | 5425,566667 | 991,2806621 |
| Q16543 | 63007       | 6226,057527  | 62057       | 9123,337894 | 62494,66667 | 9404,953134 | 17179,66667 | 10820,91503 | 70393,66667 | 3165,029559 | 68318,66667 | 2963,233613 |
| Q16555 | 1612966,667 | 86870,427114 | 1481433,333 | 53158,76639 | 1504433,333 | 13786,99065 | 1813366,667 | 25651,01254 | 1434366,667 | 70908,02337 | 1465566,667 | 21789,16652 |
| Q16563 | 397870      | 15420,75225  | 361196,6667 | 15107,69377 | 346393,3333 | 21221,97943 | 356646,6667 | 6920,602896 | 330493,3333 | 17946,33698 | 358643,3333 | 16106,22274 |
| Q16658 | 1533533,333 | 60317,44726  | 1179233,333 | 49460,56791 | 1190066,667 | 79757,05472 | 1478400     | 36025,96286 | 1416766,667 | 40125,85755 | 1451000     | 97006,87261 |
| Q16678 | 117131      | 17678,39739  | 121149      | 16700,84402 | 117996,6667 | 11051,35939 | 233500      | 11814,60537 | 99860,33333 | 6704,71427  | 102746,6667 | 7161,038876 |
| Q16698 | 22245,33333 | 7354,69105   | 37572,66667 | 1416,166931 | 22490       | 8079,711133 | 29616       | 4849,498565 | 31339,66667 | 8097,756363 | 23573,96667 | 9249,540412 |
| Q16740 | 7421,333333 | 7421,333333  | 11879,13333 | 1986,857205 | 19768       | 739,8398475 | 18185,33333 | 1960,716989 | 8714,853333 | 4238,12433  | 14499,33333 | 7251,208666 |
| Q16775 | 4626,333333 | 4626,333333  | 4782,666667 | 4782,666667 | 7861        | 3930,716771 | 0           | 0           | 0           | 0           | 0           | 0           |
| Q16778 | 154976,6667 | 6091,262412  | 261276,6667 | 9026,967622 | 163236,6667 | 3572,39571  | 194480      | 4724,683411 | 138696,6667 | 6528,476937 | 163893,3333 | 2962,557079 |
| Q16822 | 0           | 0            | 16651,66667 | 8471,625431 | 2874,066667 | 2874,066667 | 0           | 0           | 10868,33333 | 5466,450961 | 6649        | 6649        |
| Q16836 | 57417       | 9888,43149   | 31261       | 1927,279257 | 78019       | 3879,765586 | 25179,33333 | 3048,719367 | 75717,66667 | 2684,77841  | 61627,33333 | 1802,946231 |
| Q16851 | 1378866,667 | 52494,51823  | 1544233,333 | 15622,66871 | 1342900     | 13712,88931 | 1609900     | 25978,9017  | 1483343,333 | 43876,96181 | 1611000     | 22816,00316 |
| Q16881 | 100306,3333 | 11440,0998   | 78809       | 7004,941399 | 96243,66667 | 9494,506347 | 115206,6667 | 6854,838518 | 98494,66667 | 3362,966465 | 103590      | 2592,109823 |
| Q16891 | 108683,3333 | 7362,323758  | 85818,66667 | 18890,12456 | 120603,3333 | 7417,489093 | 87248       | 14593,12263 | 105830,6667 | 14578,18943 | 120910      | 5044,591163 |
| Q27J81 | 18900,66667 | 4300,162801  | 70259,66667 | 29580,30826 | 14966,66667 | 2267,985621 | 19381       | 1883,128868 | 20270       | 2509,482085 | 21375,33333 | 3932,550586 |
| Q32P28 | 111137,3333 | 20603,70016  | 76604,33333 | 6204,859932 | 153253,3333 | 1434,344604 | 125983,3333 | 14197,607   | 126920      | 17170,70859 | 111176,6667 | 1345,044402 |
| Q3KQV9 | 40279       | 2720,23608   | 14874,66667 | 1025,820701 | 29756,33333 | 1199,405455 | 22568,66667 | 1512,869716 | 26884,66667 | 2080,714968 | 30515,66667 | 852,0927832 |
| Q3LXA3 | 21135       | 2210,443922  | 17187,33333 | 928,1877205 | 22040       | 1523,962707 | 18331       | 713,1215418 | 20637,66667 | 1108,889585 | 19408       | 636,0872582 |
| Q460N5 | 32615,33333 | 3224,476202  | 24182,2     | 9087,166689 | 25962,33333 | 7103,091213 | 37101       | 3052,274944 | 15473,6     | 5581,824993 | 16082,23333 | 8817,045517 |
| Q53GQ0 | 152740      | 8258,355365  | 89711,33333 | 2987,709844 | 145826,6667 | 16301,99613 | 125003,3333 | 2504,944    | 126270      | 12027,24546 | 136064,3333 | 21085,46598 |
| Q53TN4 | 538863,3333 | 18604,49438  | 689793,3333 | 564120,9914 | 739636,6667 | 5616,779425 | 471576,6667 | 8839,468938 | 379590      | 135489,8352 | 432106,6667 | 157804,6582 |
| Q5EB52 | 51310       | 5524,583152  | 43360,33333 | 4925,651982 | 44124       | 4311,493631 | 59330       | 3994,129567 | 42543       | 3513,185497 | 45157,33333 | 3088,097059 |
| Q5SSJ5 | 69708,66667 | 6240,979206  | 106719,6667 | 8368,11907  | 79568,66667 | 6040,357394 | 74715,66667 | 12097,70056 | 88876,33333 | 13057,68459 | 86029,66667 | 6087,223952 |
| Q5VYK3 | 24735,9     | 10280,45321  | 23358,33333 | 5811,382662 | 41073,33333 | 5895,371527 | 33572,66667 | 357,6368425 | 39760,66667 | 2504,516542 | 36670       | 2155,315986 |
| Q63ZY3 | 117059      | 21557,80773  | 102368      | 19289,05801 | 75883       | 7434,577684 | 76885,33333 | 18188,1165  | 63644,33333 | 5099,504039 | 67270,66667 | 4952,926554 |
| Q6DD88 | 339866,6667 | 15046,02531  | 262360      | 16911,21521 | 345610      | 27087,10579 | 306333,3333 | 12627,30551 | 316606,6667 | 6193,411374 | 294683,3333 | 9042,223792 |
| Q6IAA8 | 62236,33333 | 12684,77227  | 38066,66667 | 2773,863811 | 55265,33333 | 9766,07967  | 51700,66667 | 2678,822772 | 24848       | 12432,62552 | 50267,66667 | 9353,758503 |
| Q6NUM9 | 1750,633333 | 1750,633333  | 4477,533333 | 1428,881724 | 0           | 0           | 3778,9      | 1924,497291 | 0           | 0           | 0           | 0           |
| Q6NZ12 | 1576866,667 | 15768,5693   | 1569533,333 | 64003,55025 | 1465533,333 | 84201,84743 | 1579133,333 | 35924,10209 | 1682700     | 162055,2478 | 1600566,667 | 28149,97533 |
| Q6P2Q9 | 14777,66667 | 1069,957372  | 7613,066667 | 1129,920818 | 10605,53333 | 533,8758449 | 13552       | 1273,188517 | 13416       | 1783,166939 | 17327,33333 | 831,325314  |
| Q6PGP7 | 16831,66667 | 9341,560511  | 15125,3     | 4868,404628 | 17017       | 4148,769978 | 10712       | 6165,325863 | 8290,3      | 5987,912666 | 16840       | 5703,447846 |
| Q6PKG0 | 46826,33333 | 9536,734964  | 17455       | 3332,325964 | 33329,66667 | 2104,554136 | 36235,66667 | 2868,288824 | 13776,33333 | 932,3240376 | 33164,33333 | 3694,648217 |
| Q6UVK1 | 492330      | 19997,87739  | 532313,3333 | 14257,84268 | 448990      | 12123,14041 | 492240      | 12310,81774 | 523976,6667 | 16712,57544 | 475663,3333 | 28362,71986 |
| Q6YHK3 | 97354,33333 | 26147,90942  | 88793,66667 | 17516,03922 | 63293,33333 | 20445,9634  | 97345,66667 | 16014,02621 | 97834,66667 | 18671,80977 | 108543,3333 | 2562,11718  |
| Q70UQ0 | 23704,33333 | 11971,50623  | 44149,33333 | 2178,268604 | 26344       | 3551,626998 | 33214,66667 | 4802,56273  | 11969,96667 | 5655,671466 | 28753,5     | 10657,78143 |
| Q71U36 | 2973366,667 | 254070,9634  | 2435366,667 | 42588,43088 | 3039966,667 | 350366,7333 | 3235766,667 | 172070,5411 | 2645533,333 | 27599,35587 | 2333166,667 | 228534,3616 |
| Q76M96 | 29297,33333 | 5606,612891  | 28067,33333 | 6883,546429 | 38701,33333 | 3039,942452 | 37496,33333 | 3028,373454 | 30773,33333 | 4001,064289 | 46583,33333 | 7118,767036 |
| Q7KZF4 | 693140      | 11876,77145  | 632223,3333 | 65531,0014  | 737033,3333 | 50935,99819 | 677183,3333 | 39850,22808 | 705646,6667 | 28765,75182 | 696100      | 41181,0199  |
| Q7L1Q6 | 231486,6667 | 9684,923564  | 140363,3333 | 11967,08031 | 204373,3333 | 12341,47794 | 160936,6667 | 4718,157597 | 327380      | 63658,66974 | 233993,3333 | 10709,62236 |
| Q7L2H7 | 2492,733333 | 2492,733333  | 416,5333333 | 3188,5      | 3188,5      | 3889,666667 | 2424,122545 | 1774,266667 | 1774,266667 | 1774,266667 | 12044,46667 | 3626,425745 |
| Q7L576 | 154503,3333 | 9517,860988  | 126953,3333 | 1865,335835 | 121570      | 6743,463502 | 174320      | 2537,853424 | 136690      | 15013,02546 | 145453,3333 | 4861,022983 |
| Q7RTS9 | 1438,533333 | 1438,533333  | 2303,53     | 1016,350693 | 4177,533333 | 2200,8877   | 4522,066667 | 430,273945  | 3792,2      | 2019,207095 | 3897,466667 | 1957,657816 |
| Q7Z3U7 | 15975,33333 | 1566,679326  | 17661,33333 | 1489,387495 | 10698,66667 | 5395,885047 | 18947       | 1681,780108 | 18053       | 1378,284925 | 17249,66667 | 1176,621907 |
| Q7Z6Z7 | 7929,366667 | 324,4905563  | 3802,9      | 2113,951774 | 9306        | 342,9621116 | 5783,466667 | 207,7596876 | 7800,433333 | 556,7680736 | 7693,566667 | 268,2820489 |
| Q86UE4 | 67907,33333 | 6128,043253  | 67722,66667 | 5907,175307 | 88464,66667 | 4641,851295 | 64243       | 4408,226665 | 58960       | 7030,906153 | 79785       | 14135,37311 |
| Q86UP2 | 184650      | 13438,71398  | 152436,6667 | 18811,08302 | 136105      | 22723,56321 | 149813,3333 | 6085,119373 | 154876,6667 | 9364,29804  | 140263,3333 | 15219,85691 |
| Q86VP6 | 398286,6667 | 18125,52007  | 351980      | 20131,75684 | 407023,3333 | 13508,2226  | 423933,3333 | 21815,94244 | 408786,6667 | 28123,78017 | 412370      | 12309,49363 |
| Q86VV6 | 52852,33333 | 2144,340795  | 56515       | 2144,526055 | 53739       | 6113,755665 | 57788       | 4634,805857 | 56983       | 615,5420376 | 55746,33333 | 6947,950065 |
| Q8IVF2 | 39638,33333 | 4921,952334  | 54797       | 7059,187229 | 39669       | 2461,225508 | 44602,66667 | 1130,530013 | 28964       | 14714,93868 | 50066       | 6922,775624 |
| Q8IWA5 | 36774,66667 | 3678,312581  | 21051,66667 | 972,2073396 | 18565,33333 | 1670,260492 | 26649,33333 | 572,0443844 | 24360,66667 | 3423,18518  | 36019,66667 | 1600,185649 |
| Q8IWE2 | 42789,33333 | 4592,155098  | 34572,33333 | 3126,241425 | 51432       | 4064,728814 | 35443,66667 | 3920,736425 | 42944,33333 | 6412,438234 | 39980       | 6678,799019 |
| Q8IXB1 | 39266,66667 | 2492,696153  | 14057,33333 | 1110,709433 | 58378,66667 | 3786,531409 | 42000,33333 | 3328,548048 | 63228,66667 | 6917,04815  | 41121,66667 | 781,4186529 |
| Q8IYD1 | 21456       | 2580,41321   | 16438       | 2508,861561 | 20888,13333 | 6036,586874 | 23073,66667 | 5539,610616 | 17128,66667 | 6249,472787 | 22174,66667 | 2582,844319 |
| Q8IZP2 | 187243,3333 | 7539,306629  | 221910      | 16999,03625 | 199066,6667 | 8949,743634 | 230226,6667 | 11262,02222 | 256926,6667 | 10114,50169 | 229193,3333 | 26800,46662 |
| Q8IZV5 | 23994,66667 | 836,7441531  | 9504,5      | 1004,208828 | 13245,66667 | 372,421953  | 12149       | 554,4441661 | 12457,03333 | 1891,952678 | 17052       | 1105,392238 |
| Q8N0U8 | 13049,66667 | 663,7997523  | 6264,333333 | 309,7019015 | 11326,5     | 1099,156533 | 9666,6      | 660,254     |             |             |             |             |

|        |             |             |             |             |             |             |             |              |             |             |             |              |
|--------|-------------|-------------|-------------|-------------|-------------|-------------|-------------|--------------|-------------|-------------|-------------|--------------|
| Q8N142 | 6577,633333 | 143,3378333 | 9257,066667 | 1177,466781 | 7488        | 3806,412528 | 7321,9      | 380,34579    | 8305,666667 | 511,8736346 | 10593,8     | 1065,406013  |
| Q8N1G4 | 123136,6667 | 11827,96169 | 83227,66667 | 19927,3321  | 109730      | 1567,971088 | 135443,3333 | 2726,464948  | 81709       | 17803,20736 | 65308,66667 | 18323,07523  |
| Q8N357 | 61701       | 6306,665363 | 76566       | 3807,078539 | 65676,33333 | 8076,597413 | 76267,33333 | 14626,11238  | 59225       | 20428,9433  | 56031       | 5554,022806  |
| Q8N766 | 41223,36667 | 20353,42525 | 5930,266667 | 530,7770729 | 60188,33333 | 899,1049871 | 11487,4     | 1272,264422  | 69981,66667 | 624,7811172 | 56324       | 3832,064239  |
| Q8N8S7 | 222263,3333 | 17561,15062 | 235660      | 26000,46218 | 258473,3333 | 6167,593624 | 230120      | 4362,063732  | 193806,6667 | 14277,71729 | 206073,3333 | 10152,18258  |
| Q8NBJ5 | 88903       | 2471,437638 | 54881,66667 | 6273,491567 | 88183,33333 | 10117,9767  | 85555,33333 | 3004,400347  | 90181,66667 | 6500,929481 | 78425,33333 | 4040,679165  |
| Q8NBJ7 | 58695,33333 | 8177,206804 | 23825,66667 | 1452,67814  | 56832,33333 | 3189,764586 | 40856       | 12784,791584 | 42082       | 1228,103823 | 46061,66667 | 2944,568957  |
| Q8NBS9 | 565343,3333 | 18962,79017 | 386920      | 12158,0522  | 613116,6667 | 46624,58805 | 520953,3333 | 16208,61328  | 615710      | 20770,84816 | 586866,6667 | 34225,60656  |
| Q8NCA5 | 0           | 0           | 6558,2      | 923,1913182 | 8560,333333 | 4287,27716  | 2642,633333 | 2642,633333  | 5468,666667 | 5468,666667 | 7537,866667 | 3936,678975  |
| Q8NE71 | 13728,66667 | 755,009345  | 7172,8      | 257,7348832 | 14056,66667 | 1008,411677 | 11585,66667 | 677,2223498  | 16899,33333 | 1244,518158 | 13602,33333 | 1052,73522   |
| Q8NEV1 | 24253,66667 | 4196,149995 | 10434,83333 | 2019,004724 | 16371,53333 | 3535,581661 | 5754,333333 | 5754,333333  | 12110,33333 | 6135,449246 | 16850       | 1463,621877  |
| Q8NHP8 | 226980      | 3927,853527 | 127066,6667 | 26506,11397 | 176056,6667 | 2321,876636 | 180716,6667 | 6038,78943   | 168886,6667 | 5091,79187  | 192193,3333 | 4017,313917  |
| Q8TAT6 | 30389,66667 | 1354,529357 | 8374,7      | 733,0455125 | 31569,66667 | 821,1151631 | 23304,66667 | 2777,888667  | 33063,66667 | 1046,906607 | 30090,66667 | 1796,936776  |
| Q8TBO9 | 11987,66667 | 694,4000608 | 3520,9      | 851,7359861 | 16549       | 2577,660632 | 7507,8      | 1019,684365  | 12531,56667 | 1423,693362 | 16163,33333 | 2341,831857  |
| Q8TCT8 | 32545,33333 | 5836,14714  | 23712,66667 | 1176,180589 | 31701,33333 | 670,0351566 | 32073       | 1087,693564  | 29184,33333 | 2428,054388 | 30049,66667 | 3037,423268  |
| Q8TD55 | 54808,66667 | 1342,858808 | 52163,66667 | 1740,293111 | 40290,96667 | 18405,95129 | 40004,66667 | 16931,27876  | 48448,2     | 21401,37488 | 22486,6     | 18123,36488  |
| Q8WUM4 | 457443,3333 | 21789,67039 | 354576,6667 | 21748,44464 | 399493,3333 | 33419,23664 | 396203,3333 | 13300,03175  | 323543,3333 | 11263,3866  | 379880      | 97111,108759 |
| Q8WWW1 | 186983,3333 | 22394,76303 | 218640      | 12743,33944 | 169923,3333 | 15204,94693 | 163143,3333 | 11151,75073  | 151610      | 7792,203368 | 190976,6667 | 8531,010752  |
| Q8WWM9 | 30355,66667 | 10352,9335  | 26454       | 3961,850367 | 22787,66667 | 2769,27309  | 24581,33333 | 5057,26706   | 26413       | 1940,277386 | 30492,66667 | 2185,904262  |
| Q8WX93 | 53862,33333 | 1872,71081  | 10030,33333 | 10030,33333 | 39431,66667 | 5472,524047 | 39676,33333 | 2077,527724  | 45753       | 4044,160729 | 43445,33333 | 3772,393994  |
| Q8WXF1 | 952,266667  | 952,266667  | 39554,33333 | 2863,858605 | 19290,33333 | 12454,84206 | 39739,66667 | 4713,524242  | 25012,66667 | 12521,55317 | 24727       | 12377,69633  |
| Q92A99 | 408320      | 43174,58975 | 316776,6667 | 33922,01956 | 294236,6667 | 16365,48434 | 245736,6667 | 13497,38781  | 259076,6667 | 29242,89904 | 382126,6667 | 42857,73767  |
| Q92542 | 276610      | 14197,66295 | 201870      | 9826,608435 | 229493,3333 | 12104,39911 | 224293,3333 | 14374,28298  | 256933,3333 | 42407,35484 | 228733,3333 | 5999,745365  |
| Q92597 | 34885       | 4694,811427 | 42445,66667 | 5755,869651 | 30462       | 868,0362896 | 50661,33333 | 2488,652268  | 36947,66667 | 3367,821865 | 35925,66667 | 3043,956982  |
| Q92598 | 16270       | 708,8951497 | 24852,33333 | 3819,955381 | 20973       | 1151,906825 | 26315,66667 | 3126,600195  | 26083,33333 | 946,2982851 | 26182,66667 | 3911,325322  |
| Q92616 | 176243,3333 | 10368,87704 | 145950      | 2242,550631 | 172033,3333 | 15029,0855  | 138163,3333 | 15051,12657  | 197023,3333 | 25704,50177 | 118403,6667 | 17457,67396  |
| Q92688 | 129810,6667 | 34319,65618 | 144473,3333 | 14924,08605 | 117289      | 32291,42648 | 151020      | 6440,279497  | 72780       | 30129,93172 | 100924,3333 | 38600,62843  |
| Q92743 | 595386,6667 | 17413,31419 | 448083,3333 | 14867,66775 | 493346,6667 | 20567,25256 | 540006,6667 | 8734,49547   | 635143,3333 | 12427,73288 | 544956,6667 | 29524,74744  |
| Q92747 | 13564       | 7415,627575 | 27220       | 1212,665796 | 0           | 0           | 22147,33333 | 1242,058014  | 26103       | 6990,954227 | 25004,66667 | 2852,788947  |
| Q92841 | 50697,66667 | 13630,32397 | 39774,33333 | 13793,59144 | 69737,33333 | 7110,684316 | 63492,66667 | 3592,673301  | 77869,33333 | 6189,740499 | 57622,33333 | 9618,179529  |
| Q92896 | 50874       | 2823,136081 | 18612       | 1506,716408 | 61833,66667 | 6539,83701  | 31219,33333 | 1682,888126  | 61961,66667 | 3012,550101 | 56801,66667 | 7505,179996  |
| Q92905 | 29690       | 14876,80444 | 39457,66667 | 4218,072322 | 42692,66667 | 3761,093118 | 52977       | 1945,357808  | 24169,33333 | 12421,3275  | 28896,33333 | 14628,25909  |
| Q92930 | 8575,333333 | 8575,333333 | 17087       | 1981,90321  | 24564,33333 | 2201,604364 | 21275,33333 | 1852,610081  | 15834,66667 | 8164,469983 | 21643       | 256,5157655  |
| Q92973 | 82462,66667 | 17046,2996  | 59090       | 3514,074036 | 93017,66667 | 5716,843078 | 80488,66667 | 2220,221035  | 91925,33333 | 16163,28846 | 79894,33333 | 10634,16445  |
| Q969G5 | 140453,3333 | 17797,94963 | 196833,6667 | 76765,22739 | 195210      | 19437,84282 | 185836,6667 | 8994,832467  | 155990      | 15116,55715 | 175490      | 6400,65882   |
| Q969H8 | 24766       | 18103,73758 | 78104       | 4936,370732 | 45675       | 10107,85765 | 59152       | 4139,088426  | 69655       | 9410,641707 | 58392,33333 | 6023,890253  |
| Q969X5 | 211530      | 4829,589355 | 176870      | 8444,147875 | 221180      | 8710,685009 | 228446,6667 | 1695,035234  | 227810      | 15823,89333 | 215480      | 5558,114189  |
| Q96A65 | 7471        | 245,0538104 | 1081,5      | 1081,5      | 1637,333333 | 1637,333333 | 4058,033333 | 733,3779842  | 3191,613333 | 1511,124222 | 3290,933333 | 1693,630303  |
| Q96AB3 | 123451,3333 | 17147,91577 | 49658       | 28567,19898 | 22403,33333 | 4190,974443 | 90678,66667 | 37329,68223  | 58218,33333 | 35067,45729 | 114996,6667 | 45916,26086  |
| Q96AC1 | 175560      | 20614,3615  | 185646,6667 | 14424,56508 | 115600      | 13341,12439 | 187300      | 4333,139739  | 181393,3333 | 9739,002915 | 184580      | 7184,492559  |
| Q96AE4 | 57682,33333 | 3184,511335 | 60355,66667 | 3963,596949 | 61406,66667 | 3732,854553 | 83151,66667 | 4029,524427  | 71815       | 8277,757184 | 60416,66667 | 7083,882583  |
| Q96AG4 | 215306,6667 | 1340,277749 | 229983,3333 | 14761,03467 | 280626,6667 | 11143,70724 | 209186,6667 | 9415,636522  | 242326,6667 | 9037,039215 | 220580      | 12806,97206  |
| Q96AY3 | 230670      | 15983,75425 | 227110      | 3776,378336 | 294706,6667 | 12835,26436 | 263836,6667 | 6637,92722   | 304293,3333 | 5856,248325 | 247953,3333 | 10129,71262  |
| Q96CV9 | 7150        | 1166,861716 | 7938,366667 | 977,1580993 | 14344       | 1347,44734  | 12763,93333 | 2207,158023  | 6922,366667 | 3555,027422 | 7788,1      | 976,677236   |
| Q96DA0 | 348270      | 10038,56563 | 84266       | 9802,669296 | 65295,33333 | 5121,633279 | 63203       | 3800,101051  | 73172,33333 | 5683,14858  | 117486,6667 | 6822,077722  |
| Q96G03 | 96041,33333 | 13674,45191 | 59076,66667 | 15785,98993 | 108551      | 7421,214478 | 105150      | 9016,390242  | 68610,33333 | 34604,353   | 100834,3333 | 10835,26213  |
| Q96HC4 | 1635166,667 | 108888,572  | 701580      | 42155,19106 | 1336200     | 32874,35677 | 1244033,333 | 25305,35736  | 628546,6667 | 42623,89484 | 1345400     | 112334,9604  |
| Q96HE7 | 126810      | 8858,895717 | 113126,6667 | 6812,009819 | 130536,6667 | 12493,63349 | 110906,6667 | 2173,801074  | 102141,6667 | 15937,65989 | 131080      | 11504,07029  |
| Q96HY6 | 9617        | 9617        | 8225,633333 | 1042,165199 | 8400,526667 | 3953,133098 | 8346,57     | 3955,077339  | 9409        | 4838,88565  | 11978,33333 | 6018,931587  |
| Q96IJ6 | 11114,26667 | 958,51959   | 8525        | 775,3421761 | 11717       | 769,3557911 | 10013,4     | 799,9581385  | 14804,66667 | 1145,743039 | 10986,33333 | 245,3849583  |
| Q96IU4 | 98538       | 5862,124302 | 82995,66667 | 5214,605013 | 88012,33333 | 10465,53598 | 107160      | 1949,777765  | 114353,3333 | 1913,394308 | 105798,3333 | 6668,557024  |
| Q96JY6 | 81492,33333 | 19804,55105 | 89997,66667 | 8760,157996 | 74504,66667 | 2310,617258 | 87838,33333 | 3189,839773  | 67855,66667 | 12456,5392  | 83207,66667 | 21831,57927  |
| Q96KA5 | 12913,33333 | 6583,66854  | 2468,4      | 1241,870445 | 22923       | 3023,920138 | 3966,983333 | 2893,029372  | 23901,66667 | 3504,17191  | 21891,33333 | 821,1752418  |
| Q96KP4 | 154233,3333 | 1957,330949 | 171176,6667 | 12950,75073 | 197096,6667 | 2836,090815 | 165333,3333 | 10666,54635  | 149306,6667 | 8033,961939 | 160136,6667 | 8499,024127  |
| Q96PU5 | 6929,266667 | 3686,579843 | 0           | 0           | 3435        | 3435        | 6151,366667 | 3126,662891  | 8675        | 4392,893466 | 4563        | 4563         |
| Q96QK1 | 618783,3333 | 60279,62213 | 455316,6667 | 29545,26997 | 574916,6667 | 31778,03662 | 610966,6667 | 41557,58107  | 615483,3333 | 28209,24573 | 551536,6667 | 20609,04359  |
| Q96SU4 | 21282,7     | 7270,149257 | 21904       | 1527,856778 | 21218,33333 | 1493,279426 | 20507,33333 | 2077,66779   | 30107,33333 | 3720,172681 | 19165,36667 | 6453,839986  |
| Q96TA1 | 308650      | 7201,391069 | 199390      | 8603,69688  | 336483,3333 | 18006,16314 | 259463,3333 | 9667,652823  | 320886,6667 | 15361,78628 | 307813,3333 | 6224,495517  |
| Q99439 | 207136,6667 | 70919,05276 | 236573,3333 | 11712,53222 | 708763,6667 | 317554,5198 | 344235,3333 | 286287,3559  | 47297,33333 | 7557,109111 | 123810,6667 | 50397,95849  |
| Q99460 | 435730      | 29963,9222  | 345753,3333 | 21005,31229 | 326750      | 8611,627798 | 431580      | 82007,86752  | 455810      | 31135,93155 | 418796,6667 | 45765,56432  |
| Q99497 | 688490      | 27170,6723  | 747573,3333 | 32082,50008 | 694420      | 1636,978925 | 704063,3333 | 8440,036203  | 778670      | 32232,27627 | 708156,6667 | 32344,6731   |
| Q99519 | 39347,66667 | 6971,527578 | 23623,13333 | 12241,50952 | 37579       | 5199,494719 | 47789,33333 | 4430,670541  | 55109,66667 | 4178,596588 | 52999,33333 | 2928,216427  |
| Q99536 | 1177466,667 | 42540,07261 | 953513,3333 | 27601,09317 | 963096,6667 | 22141,1836  | 895740      | 12716,82481  | 858286,6667 | 8970,154836 | 1063913,333 | 39550,77131  |
| Q99613 | 66269,66667 | 2136,120497 | 59941,66667 | 5567,332854 | 74818,33333 | 3542,187852 | 66554,66667 | 2383,3       |             |             |             |              |

|        |             |             |             |              |             |             |             |             |             |             |             |             |
|--------|-------------|-------------|-------------|--------------|-------------|-------------|-------------|-------------|-------------|-------------|-------------|-------------|
| Q99623 | 453270      | 8876,577794 | 437003,3333 | 12740,65191  | 469030      | 17095,77238 | 520770      | 6374,961438 | 437676,6667 | 28474,45424 | 460983,3333 | 18539,48968 |
| Q99714 | 21143       | 2380,657542 | 16789       | 608,6312513  | 15066       | 7537,282158 | 23731       | 678,1378916 | 14665,4     | 3774,309062 | 24188       | 824,327807  |
| Q99715 | 1707200     | 62083,57271 | 1697300     | 9685,728333  | 1288966,667 | 36011,21739 | 1493000     | 37646,95649 | 1349466,667 | 45876,29502 | 1646400     | 28749,08694 |
| Q99719 | 34868,33333 | 3096,444538 | 37249,33333 | 2043,985676  | 29799,33333 | 3448,252037 | 36930,66667 | 751,9672717 | 33038       | 2219,59208  | 35070,33333 | 263,0242912 |
| Q99729 | 48316       | 6911,51568  | 3885,633333 | 94,19230919  | 48811,33333 | 2480,528058 | 19515,33333 | 1932,575599 | 39645,33333 | 2085,680251 | 41597,33333 | 3017,930435 |
| Q99733 | 19628,33333 | 3268,507118 | 19511,66667 | 2804,561423  | 21587,66667 | 2346,071137 | 18556,33333 | 974,4298048 | 20222,66667 | 3232,896757 | 15926       | 3256,332958 |
| Q99798 | 68454,66667 | 4079,193235 | 50030,66667 | 3695,975709  | 69838       | 6241,908442 | 59551       | 8994,110592 | 61661,33333 | 5115,476528 | 65392,33333 | 4944,8719   |
| Q99805 | 93555,66667 | 12132,52022 | 65752       | 3056,142067  | 118316,6667 | 8189,607914 | 67450       | 12393,38188 | 99888,66667 | 14388,25748 | 82767,66667 | 23083,22598 |
| Q99829 | 54751,66667 | 5912,545598 | 36390,66667 | 2927,205398  | 49241       | 128,7322803 | 42765,33333 | 946,445338  | 44412       | 2662,869317 | 48322       | 2066,416302 |
| Q99832 | 217336,6667 | 15857,36983 | 223520      | 8728,718883  | 221286,6667 | 17292,92951 | 180066,6667 | 3178,366107 | 190006,6667 | 7022,820738 | 219736,6667 | 25193,67138 |
| Q99873 | 93997,33333 | 47787,41928 | 79307,33333 | 49376,11232  | 67507,33333 | 25710,84709 | 123210,3333 | 42705,75609 | 156002,6667 | 48863,0596  | 164263,3333 | 9501,581155 |
| Q9BQB6 | 76471       | 3729,676974 | 84789       | 6600,438193  | 97450,33333 | 1895,974537 | 73087,66667 | 8899,711537 | 63412       | 5077,130128 | 83354,66667 | 2620,415128 |
| Q9BQE5 | 21218       | 10818,97899 | 23069,33333 | 4041,572562  | 36597       | 2345,793114 | 67262,66667 | 5366,941163 | 41439,33333 | 2543,313412 | 12863       | 7010,832071 |
| Q9BS26 | 261823,3333 | 70581,68821 | 303026,6667 | 18172,33184  | 389616,6667 | 17757,51609 | 352676,6667 | 11251,52632 | 332360      | 39613,39672 | 279830      | 32912,39027 |
| Q9BS40 | 78435,33333 | 5215,901211 | 57224,33333 | 6284,261143  | 78248,33333 | 12810,60314 | 95260,66667 | 14044,66743 | 89472,33333 | 13804,12789 | 78874       | 4119,567493 |
| Q9BSJ8 | 493146,6667 | 22810,58404 | 395590      | 10100,12046  | 450350      | 4447,594856 | 477830      | 17973,38124 | 456630      | 10380,80119 | 435516,6667 | 15038,82235 |
| Q9BTM1 | 3203666,667 | 68310,67104 | 6059200     | 47855,75549  | 3705400     | 171402,7227 | 3819900     | 92808,56641 | 3229700     | 107103,0501 | 3358066,667 | 216850,4579 |
| Q9BTU6 | 7572,333333 | 7572,333333 | 470,1333333 | 470,1333333  | 18462       | 9515,777898 | 3818,666667 | 3818,666667 | 12391,66667 | 12391,66667 | 6398        | 6398        |
| Q9BTV4 | 128266,6667 | 7193,799027 | 97220       | 5564,986643  | 114903,3333 | 7930,162532 | 115316,6667 | 5430,531998 | 122770      | 5897,228162 | 122046,6667 | 6408,724089 |
| Q9BTW9 | 18442       | 1530,903764 | 7323,7      | 250,7039565  | 13866,33333 | 1068,858789 | 9973,2      | 1317,142377 | 15847,33333 | 337,1732163 | 13031       | 1737,396616 |
| Q9BUF5 | 1032890     | 112832,5371 | 824639      | 405990,2991  | 795720      | 38717,92393 | 843820      | 16268,75021 | 1231900     | 109632,2945 | 602251,3333 | 270463,5456 |
| Q9BUT1 | 145667,3333 | 42423,57631 | 233276,6667 | 13536,37856  | 164856,6667 | 7676,21724  | 171540      | 12708,89977 | 181093,3333 | 24360,59272 | 210613,3333 | 18375,69258 |
| Q9BVK6 | 104897,6667 | 8490,747638 | 130390      | 15640,05222  | 96268       | 6093,404412 | 130976,6667 | 10219,20632 | 109292      | 15048,07988 | 116600      | 7413,584378 |
| Q9BWM7 | 35204,66667 | 2859,472698 | 34924,33333 | 558,134492   | 27046,66667 | 3225,389606 | 40732       | 3253,077927 | 31866,66667 | 4238,681569 | 37175       | 9249,278188 |
| Q9BXP5 | 49948,66667 | 1206,406418 | 52974,33333 | 4711,16144   | 35420,66667 | 17870,74671 | 50711       | 620,0849044 | 90400,33333 | 36893,31996 | 92797       | 40777,63917 |
| Q9BZF1 | 25835,66667 | 1839,986987 | 21023,33333 | 1612,353594  | 23656       | 1955,743933 | 31656,66667 | 768,6013994 | 17406,66667 | 847,9200696 | 21787,66667 | 1315,71683  |
| Q9COE8 | 34458,66667 | 945,9958304 | 22204,43333 | 6340,423442  | 19576,03333 | 5917,306203 | 36748       | 3317,440429 | 30354,33333 | 2093,9779   | 32180       | 4356,36167  |
| Q9HOR4 | 11445,66667 | 2943,168572 | 14117,16667 | 5491,902162  | 16783,7     | 5120,380141 | 13024,53333 | 7508,247421 | 28263,33333 | 5539,001364 | 18695,03333 | 6682,67647  |
| Q9H1E5 | 27572       | 2346,330539 | 9327,933333 | 1680,910984  | 30454       | 2649,043664 | 19081,33333 | 969,2152037 | 29489       | 2849,011466 | 28980       | 4367,245929 |
| Q9H299 | 342746,6667 | 15330,41132 | 304160      | 18400,56611  | 271430      | 14659,60095 | 285096,6667 | 40087,68486 | 295900      | 24208,5584  | 274373,3333 | 30391,00159 |
| Q9H2U2 | 45782,66667 | 5367,058826 | 31212,66667 | 2549,340394  | 36952,66667 | 1744,362571 | 43725,66667 | 1811,893147 | 40960,66667 | 2308,819425 | 40069,33333 | 390,3171075 |
| Q9H3N1 | 11798,5     | 1611,953964 | 6287,266667 | 1236,413065  | 14915,66667 | 1531,424863 | 11498,43333 | 1396,359584 | 14561       | 551,7475268 | 14619,33333 | 2237,853461 |
| Q9H488 | 15964,66667 | 8436,544244 | 15129,33333 | 1691,196158  | 11546       | 5776,761146 | 11045       | 5527,435783 | 10093       | 5052,171051 | 17919       | 2373,000407 |
| Q9H4A4 | 60391       | 871,4992828 | 56916       | 1554,242688  | 60697,66667 | 4064,27256  | 67614,33333 | 3910,521463 | 71749,66667 | 4644,178339 | 53476,33333 | 8202,900405 |
| Q9H4G0 | 26141,66667 | 1491,214084 | 20599,33333 | 2485,518748  | 26158,33333 | 460,6377222 | 24490,33333 | 2593,820241 | 26034,33333 | 3837,604389 | 28375,33333 | 527,7490986 |
| Q9H4M9 | 72379,66667 | 14106,21378 | 59884       | 16829,94861  | 40566       | 11797,36869 | 67381       | 14427,51456 | 81622       | 16039,04415 | 36830,63333 | 15660,64676 |
| Q9H8H3 | 15618,66667 | 503,8658331 | 1334,786667 | 250,7420657  | 12025,03667 | 5723,490354 | 6659,333333 | 1236,768389 | 20561,66667 | 2107,189308 | 18875,33333 | 1602,374939 |
| Q9H8S9 | 17781       | 10007,94036 | 3509,333333 | 3509,333333  | 16226,33333 | 8150,216773 | 20022,33333 | 2286,510612 | 17900,66667 | 3128,161405 | 17045,33333 | 9349,447494 |
| Q9H993 | 15645,33333 | 7960,000865 | 3137,866667 | 3137,866667  | 17699,23333 | 6540,332445 | 9590,333333 | 4811,519245 | 10540       | 5316,177229 | 2174,9      | 2174,9      |
| Q9H9B4 | 37491,33333 | 3546,037805 | 31734       | 3865,133547  | 37762,33333 | 2068,777524 | 40310,33333 | 2297,525142 | 32964,33333 | 2876,704963 | 37384,33333 | 439,366716  |
| Q9HB40 | 59210       | 8567,720837 | 50212,66667 | 5659,762785  | 62231,66667 | 4888,898115 | 44854,33333 | 4654,1651   | 44839       | 8821,344928 | 48567,66667 | 3017,479375 |
| Q9HC07 | 35547,33333 | 3293,372959 | 32328,66667 | 1591,104578  | 34424,66667 | 6565,80425  | 56910       | 1483,988881 | 54185       | 2212,094935 | 46645,66667 | 6148,916282 |
| Q9HD45 | 33184,33333 | 3929,647327 | 41240,33333 | 2212,418385  | 39324       | 3921,827678 | 34156,66667 | 1679,997255 | 40636,66667 | 3766,397232 | 47697,66667 | 7355,725238 |
| Q9HDC9 | 141576,3333 | 99174,97114 | 296646,3333 | 123133,54666 | 274650      | 128654,7179 | 22389,33333 | 11309,30604 | 387566,6667 | 49691,88744 | 266593,3333 | 103583,9655 |
| Q9NPF4 | 7783,666667 | 3904,836844 | 13702,66667 | 1128,206886  | 15455,66667 | 409,2962795 | 15319,33333 | 2048,937719 | 15397       | 1754,571838 | 19690       | 3173,277958 |
| Q9NPQ8 | 20165       | 1217,627338 | 3587,266667 | 197,037199   | 18472,66667 | 1148,694089 | 6861,466667 | 353,1306526 | 22999       | 1171,432599 | 18151,66667 | 1842,062642 |
| Q9NQC3 | 1148103,333 | 81241,14933 | 1172000     | 45871,81415  | 995996,6667 | 27883,60948 | 1270033,333 | 37091,52344 | 1127233,333 | 18116,68967 | 1108936,667 | 98740,41394 |
| Q9NQG5 | 4135        | 4135        | 3646        | 1837,905344  | 4864,666667 | 4864,666667 | 2338,566667 | 2338,566667 | 17194,33333 | 2005,543678 | 10183,1     | 6360,709484 |
| Q9NQL2 | 22540       | 16022,41946 | 35526,66667 | 5023,366147  | 33222       | 3248,563118 | 25239       | 13666,0587  | 29536,33333 | 11339,52111 | 25363,33333 | 13120,31424 |
| Q9NQW7 | 11219       | 5636,391487 | 13346,66667 | 6694,992092  | 12291,33333 | 6155,324669 | 7567,666667 | 7567,666667 | 10221,33333 | 5122,121642 | 0           | 0           |
| Q9NR12 | 86042       | 6104,696908 | 74518       | 7130,3132    | 60753,66667 | 6910,407955 | 55998,33333 | 4418,505378 | 61643       | 6239,623386 | 65979       | 4057,176728 |
| Q9NR31 | 15654,66667 | 1340,950699 | 859,3866667 | 501,7796577  | 24602,66667 | 2262,781278 | 7374,433333 | 487,2671147 | 14101,66667 | 975,666325  | 12012,33333 | 6361,791423 |
| Q9NR45 | 150353,3333 | 12469,17577 | 127486,6667 | 7010,169597  | 144863,3333 | 12531,35312 | 130586,6667 | 1148,424041 | 163820      | 11170,27753 | 162130      | 5701,955805 |
| Q9NRV9 | 129530      | 21366,33177 | 105701      | 23020,62378  | 90072       | 16383,39537 | 118356,3333 | 18331,7616  | 164280      | 5366,025842 | 122423,3333 | 18464,31363 |
| Q9NSD9 | 53398,33333 | 1820,466088 | 32394,33333 | 2384,394146  | 51304       | 4030,080768 | 45334,33333 | 3312,251114 | 43694       | 112,614189  | 42539,66667 | 4617,519187 |
| Q9NTJ5 | 47004       | 3882,511687 | 45064,33333 | 1830,956065  | 38691,66667 | 5212,699407 | 41555       | 3132,213115 | 49769,66667 | 975,4097145 | 44314,33333 | 3843,786565 |
| Q9NTK5 | 49325,33333 | 5575,452906 | 53391,33333 | 8343,498074  | 64504,33333 | 8576,425913 | 53495,66667 | 6591,499585 | 47890,66667 | 3243,506967 | 58047       | 7706,54806  |
| Q9NVA2 | 46389,66667 | 1637,611506 | 67860,33333 | 3970,294965  | 55024       | 1061,52783  | 45081       | 2440,6915   | 40309,66667 | 1972,192125 | 49251,33333 | 3710,340251 |
| Q9NVD7 | 56759,66667 | 4271,386283 | 41278,66667 | 2790,866313  | 53192,33333 | 6491,902888 | 56472       | 4318,810369 | 53846       | 6183,384214 | 53693       | 1778,574991 |
| Q9NVJ2 | 76048,66667 | 11101,07734 | 21133,33333 | 5045,490407  | 47748       | 15737,28342 | 36893       | 3217,655513 | 64903       | 4688,233249 | 64843       | 12134,83582 |
| Q9NY33 | 60659,33333 | 4837,860834 | 69078       | 5971,844802  | 70531,33333 | 835,4482496 | 59294       | 2865,372983 | 49140       | 2741,089017 | 61910,33333 | 6703,791721 |
| Q9NYU2 | 75537,66667 | 25587,42331 | 52014       | 12666,52253  | 59505,33333 | 11069,68296 | 80539       | 3286,807316 | 96829       | 13332,30404 | 81514,33333 | 3120,806377 |
| Q9NZM1 | 155046,667  | 32195,255   | 1160166,667 | 129287,1008  | 1006786,667 | 72356,58397 | 1344333,333 | 25617,98413 | 1030046,667 | 76352,62173 | 1153266,667 | 73556,35783 |
| Q9NZN4 | 718546,6667 | 25019,62585 | 586900      | 28438,61459  | 686903,3333 | 19112,29651 | 674590      | 19501,4008  |             |             |             |             |

|        |             |             |             |             |             |             |             |             |             |             |             |             |
|--------|-------------|-------------|-------------|-------------|-------------|-------------|-------------|-------------|-------------|-------------|-------------|-------------|
| Q9NZU5 | 448990      | 12545,82533 | 450383,3333 | 35994,00799 | 410363,3333 | 28523,83467 | 424610      | 51400,91082 | 332013,3333 | 23644,39351 | 423600      | 26553,57791 |
| Q9NZW5 | 148613,3333 | 8794,98405  | 123820      | 4401,435372 | 128840      | 10670,17494 | 121273,3333 | 9448,457252 | 122233,3333 | 8752,965847 | 133686,6667 | 4259,911319 |
| Q9P0L0 | 117550      | 3606,258449 | 102347,6667 | 4858,775097 | 105409      | 5419,89677  | 119256,6667 | 5009,488774 | 121790      | 2974,497156 | 106726,6667 | 3677,269518 |
| Q9P2B9 | 88508,33333 | 4189,517289 | 86843       | 4636,207646 | 76483,33333 | 8660,191883 | 84899,66667 | 2012,199653 | 82506,66667 | 4244,245922 | 86421,33333 | 10058,97943 |
| Q9P2B2 | 34180,33333 | 4866,010835 | 37934,66667 | 1864,10929  | 45587       | 2620,09281  | 41898       | 1406,66876  | 36630       | 2194,181017 | 34691,33333 | 1690,076954 |
| Q9P2E9 | 768833,3333 | 39350,25173 | 894210      | 22090,88575 | 867496,6667 | 20142,43641 | 714333,3333 | 15066,78614 | 910960      | 48802,10788 | 864453,3333 | 14734,2643  |
| Q9P2J5 | 16259,33333 | 8546,755024 | 0           | 0           | 12333,86667 | 9492,070435 | 12643       | 6466,493357 | 23079,33333 | 5743,420129 | 17574,33333 | 8984,610441 |
| Q9UBG0 | 37580       | 7854,500812 | 31630,33333 | 86,94889942 | 41974,33333 | 1950,898027 | 31937,66667 | 4513,005589 | 42700,33333 | 5146,785933 | 35305,33333 | 2842,964669 |
| Q9UBQ7 | 107507      | 15403,91451 | 85546,33333 | 15146,30472 | 66398       | 2015,209915 | 95520       | 1740,9372   | 91520,66667 | 5206,470632 | 95324       | 2103,374511 |
| Q9UBR2 | 281916,6667 | 25021,66683 | 262310      | 18849,88683 | 194570      | 4221,528159 | 299493,3333 | 2653,075783 | 235363,3333 | 18404,74969 | 216573,3333 | 15508,45612 |
| Q9UBS4 | 3362,666667 | 3362,666667 | 12523,66667 | 12523,66667 | 24548,33333 | 12322,29473 | 33680       | 1397,947901 | 20843       | 10510,457   | 24681       | 7604,568649 |
| Q9UDW1 | 35103,33333 | 35103,33333 | 28825,3     | 27236,11712 | 0           | 0           | 57204       | 31724,99692 | 34060       | 34060       | 5844,666667 | 5844,666667 |
| Q9UH99 | 16789,33333 | 3561,811633 | 29998       | 3577,129343 | 26588       | 2387,839819 | 16658       | 3059,052795 | 37658,66667 | 3008,820828 | 29740,33333 | 4130,021846 |
| Q9UHA4 | 353786,6667 | 43103,36465 | 49052       | 1257,159231 | 239656,6667 | 27128,82497 | 187583,3333 | 11958,41173 | 47333,66667 | 2331,589038 | 237303,3333 | 18027,0633  |
| Q9UHB6 | 636566,6667 | 50389,27972 | 497730      | 67526,37806 | 568553,3333 | 41772,55452 | 503696,6667 | 52809,41088 | 578606,6667 | 47331,54879 | 550053,3333 | 25386,03312 |
| Q9UHB9 | 19740,46667 | 6524,936757 | 8861,666667 | 4484,271488 | 28223       | 11534,72502 | 32419       | 8141,364566 | 29882,66667 | 9059,263847 | 19966,83333 | 9736,393413 |
| Q9UHD8 | 370596,6667 | 8252,963777 | 330890      | 13375,80776 | 290310      | 22649,24355 | 341700      | 20697,74867 | 300846,6667 | 17779,03009 | 312056,6667 | 11554,55802 |
| Q9UHG3 | 241183,3333 | 24133,66759 | 182546,6667 | 4787,937389 | 185086,6667 | 9951,92667  | 227010      | 9674,8385   | 193116,6667 | 5759,485895 | 238446,6667 | 17792,63924 |
| Q9UHL4 | 127763,3333 | 8070,837076 | 128646,6667 | 6115,418583 | 118516,6667 | 6275,854081 | 127973,3333 | 1949,096657 | 117616,6667 | 2751,341087 | 121230      | 8214,675891 |
| Q9UHQ9 | 216360      | 11254,64497 | 215066,6667 | 8378,22641  | 189390      | 11222,47893 | 221690      | 16933,37041 | 201503,3333 | 7191,060036 | 218823,3333 | 7700,676017 |
| Q9UHW9 | 59977       | 4369,888137 | 54849       | 6049,444961 | 46029,33333 | 1882,764044 | 54806,66667 | 3336,780501 | 58499,33333 | 3915,166677 | 56703,66667 | 1032,933901 |
| Q9UI12 | 43611       | 3933,685464 | 19302,33333 | 2604,349588 | 29808,33333 | 864,9056467 | 19695,33333 | 2239,471093 | 41771,33333 | 2391,862059 | 36952,66667 | 2331,046212 |
| Q9UIJ7 | 70978,66667 | 8259,309986 | 76098       | 9319,223412 | 67376       | 559,880642  | 115630      | 1264,33118  | 86020,33333 | 5496,830885 | 74871,33333 | 7361,382668 |
| Q9UIQ6 | 21398,66667 | 13320,0321  | 50115       | 4118,755192 | 43070,33333 | 5283,745399 | 64257       | 3351,276523 | 33664,33333 | 11056,59993 | 54500,33333 | 5896,970305 |
| Q9UJ70 | 77679,33333 | 10972,16208 | 61058,33333 | 3170,29769  | 85261       | 11745,80497 | 74140       | 3376,826962 | 67905,66667 | 6269,406174 | 78191       | 7568,311767 |
| Q9UJS0 | 38267       | 3628,778904 | 24899       | 2683,951626 | 34636       | 1629,550858 | 37179,33333 | 267,7525806 | 40264       | 3644,974486 | 37928,66667 | 4164,256329 |
| Q9UK22 | 21883,33333 | 21883,33333 | 10801,66667 | 10801,66667 | 47520,33333 | 5214,081585 | 48887,83333 | 21181,63065 | 22209       | 11106,77678 | 24437,66667 | 1644,670213 |
| Q9UKK3 | 28607,66667 | 4340,76738  | 19770,33333 | 544,1838946 | 19555,66667 | 4034,476188 | 26607,66667 | 1217,181489 | 19994,66667 | 1192,757077 | 28612,66667 | 4154,556909 |
| Q9UKS6 | 0           | 0           | 2560,266667 | 2560,266667 | 7338,266667 | 3746,928592 | 4049        | 4049        | 1876,866667 | 0           | 0           | 0           |
| Q9UL25 | 32505,66667 | 14794,28568 | 22574,23333 | 9056,604718 | 50423       | 6533,098729 | 30431,26667 | 11170,34122 | 25748,66667 | 8746,230852 | 44839,33333 | 11637,81459 |
| Q9UL46 | 127401,6667 | 22666,39516 | 75210,23333 | 35841,63509 | 100131,6667 | 12460,02772 | 139286,6667 | 3133,391843 | 139983      | 27939,36773 | 66316,66667 | 6031,467749 |
| Q9ULV4 | 986443,3333 | 69503,49544 | 900563,3333 | 39718,40981 | 857460      | 62342,70634 | 1034690     | 37101,47481 | 797516,6667 | 130721,5491 | 948810      | 52270,20598 |
| Q9UM00 | 9400,333333 | 4749,907239 | 8859,2      | 437,9025044 | 16616,33333 | 799,8646413 | 14461,66667 | 857,4035093 | 14422,33333 | 875,8128288 | 15541,33333 | 1988,158389 |
| Q9UNA0 | 10067,66667 | 5042,864276 | 1522,733333 | 1522,733333 | 15546       | 1924,162242 | 13553       | 1444,782683 | 13636,66667 | 6892,363729 | 15185       | 1137,497692 |
| Q9UNH7 | 38129,33333 | 4629,897959 | 32668,33333 | 2245,113385 | 38710,33333 | 4355,169432 | 35577,66667 | 5682,600881 | 20761       | 1945,620467 | 29794       | 3217,698401 |
| Q9UNM6 | 96715       | 8913,768021 | 83776,33333 | 2820,3942   | 100356      | 10922,26027 | 86922,33333 | 3316,532644 | 99122,33333 | 10993,61734 | 103121,3333 | 12956,46461 |
| Q9UNN8 | 29489,66667 | 18511,85847 | 31935,66667 | 3933,535659 | 42463,33333 | 10068,94222 | 32302       | 3178,547519 | 50532,66667 | 3093,041348 | 41332,66667 | 10007,64763 |
| Q9UPN3 | 56235,33333 | 9913,628672 | 56949,66667 | 7361,3646   | 41583,33333 | 4783,269744 | 51156,66667 | 10460,33423 | 70223,66667 | 6667,976813 | 39175,33333 | 13409,57333 |
| Q9UQ80 | 189936,6667 | 3577,766218 | 175430      | 4515,023071 | 169030      | 9656,740306 | 207263,3333 | 24328,3794  | 170450      | 4942,209357 | 172973,3333 | 23222,84388 |
| Q9Y224 | 81001       | 17872,75229 | 30218,66667 | 7882,453855 | 75752       | 11931,16461 | 56000,33333 | 12869,09067 | 75438       | 14641,11311 | 78745,33333 | 4290,027985 |
| Q9Y230 | 178820      | 7264,50503  | 130943,3333 | 849,1237313 | 132340      | 7115,239513 | 144846,6667 | 3855,006845 | 160300      | 12372,36571 | 163376,6667 | 6305,873805 |
| Q9Y262 | 111115      | 16638,59144 | 54971,66667 | 19302,5709  | 83896,33333 | 5097,394116 | 83265,66667 | 12228,05443 | 99118       | 4097,097021 | 112615,6667 | 17252,26463 |
| Q9Y265 | 1389219,333 | 1362694,282 | 25768,66667 | 2902,585591 | 604730,3333 | 585990,0398 | 716457,3333 | 686588,0805 | 31222       | 2230,349151 | 1081792,667 | 1055154,532 |
| Q9Y285 | 24373       | 2231,447064 | 11193       | 564,891435  | 23396       | 1466,205647 | 15389,33333 | 2126,89714  | 15080,33333 | 189,3474173 | 17774       | 993,6842221 |
| Q9Y2A7 | 136170      | 12353,01313 | 83050,66667 | 5747,759863 | 118743,3333 | 5963,358487 | 122006,6667 | 6587,790053 | 131876,6667 | 11354,39024 | 127546,6667 | 6837,417479 |
| Q9Y2E5 | 17349,66667 | 4257,390215 | 6771,033333 | 3435,314571 | 5461        | 5461        | 5924,3      | 3051,905491 | 9200,266667 | 5308,450182 | 8591        | 4348,783776 |
| Q9Y2G5 | 55654,66667 | 4181,87822  | 24528       | 3023,382047 | 52430,66667 | 683,4318628 | 44521       | 1870,118267 | 51306,33333 | 3960,64003  | 56797       | 3534,001179 |
| Q9Y3A5 | 31279,33333 | 15680,92771 | 57081,66667 | 5893,953352 | 16352       | 8953,508977 | 25260       | 25260       | 24611,33333 | 3038,250886 | 33216,33333 | 3674,733429 |
| Q9Y3B3 | 91891,33333 | 4184,411441 | 103099      | 6921,236234 | 105236      | 4691,702179 | 121703,3333 | 8413,365029 | 115560      | 6177,191919 | 89202       | 2126,478074 |
| Q9Y3B8 | 57790       | 9509,124793 | 55727,66667 | 5356,542179 | 54350,33333 | 4685,295307 | 42292,66667 | 101,8321058 | 63467       | 2299,287788 | 69998       | 2621,940185 |
| Q9Y3E0 | 28759,66667 | 3487,719663 | 32103,33333 | 840,7949281 | 36451       | 1592,410856 | 34851,33333 | 1956,636663 | 36346       | 1950,754726 | 31758,33333 | 2135,736901 |
| Q9Y3E5 | 5570,866667 | 2809,971756 | 10417,4     | 1008,90024  | 13846       | 313,8030168 | 6513,233333 | 3296,918934 | 7629,666667 | 3819,689443 | 3588        | 3588        |
| Q9Y3F4 | 71202,33333 | 7525,233758 | 65031,66667 | 13757,39784 | 47037,33333 | 1185,19778  | 88529       | 8971,078215 | 105908,3333 | 11119,67638 | 66516,33333 | 17501,02302 |
| Q9Y490 | 1540300     | 38701,72261 | 1455100     | 24704,85782 | 1475100     | 33470,93266 | 1584133,333 | 13745,4639  | 1687133,333 | 101422,291  | 1501933,333 | 45859,28962 |
| Q9Y4G6 | 4214,666667 | 118,2912554 | 264,6633333 | 219,620022  | 4376,4      | 297,8661276 | 1327,676667 | 785,9122516 | 3692,166667 | 448,0703715 | 3589,433333 | 425,3102136 |
| Q9Y4L1 | 209613,3333 | 13446,69517 | 191120      | 13009,21596 | 238073,3333 | 3906,261356 | 274240      | 5090,155848 | 256710      | 12163,19585 | 237840      | 6718,266145 |
| Q9Y512 | 11186       | 5797,880734 | 8026,666667 | 8026,666667 | 6172,666667 | 6172,666667 | 3144,666667 | 3144,666667 | 0           | 0           | 3289,4      | 3289,4      |
| Q9Y5M8 | 33007       | 18695,33916 | 25980,66667 | 13187,00345 | 48027,33333 | 10176,84598 | 46541       | 2696,712876 | 41509       | 6554,525638 | 60124,66667 | 4476,543843 |
| Q9Y5P6 | 63779,66667 | 10946,74552 | 79098       | 4049,740856 | 70406       | 8615,45497  | 74509,33333 | 3590,023878 | 80161       | 5488,611573 | 69411       | 8218,911445 |
| Q9Y5S2 | 2550,466667 | 293,8785539 | 664,0833333 | 290,9607644 | 3373,733333 | 1486,242782 | 358,6133333 | 295,8962533 | 2647,1      | 94,28281922 | 2116,1      | 685,719639  |
| Q9Y5X1 | 27470,66667 | 13755,44849 | 25762       | 1667,203147 | 32650,66667 | 1006,87393  | 31650       | 4854,620102 | 10859,33333 | 10859,33333 | 41049,33333 | 3586,194005 |
| Q9Y5X3 | 13703,6     | 5053,265653 | 6597        | 3480,060775 | 14009,33333 | 4233,471166 | 18871,66667 | 772,1939163 | 3752        | 21516,66667 | 2056,647785 |             |
| Q9Y617 | 548056,6667 | 36990,13397 | 576003,3333 | 13876,29193 | 541510      | 39220,36333 | 602560      | 10503,49624 | 483903,3333 | 21826,18789 | 554166,6667 | 4702,922259 |
| Q9Y625 | 120435,3333 | 19819,04022 | 77199,33333 | 8740,310928 | 97195,66667 | 15274,40546 | 96770,33333 | 11997,07951 | 96643       | 2039,081247 | 88178,66667 | 16751,01089 |

|        |             |             |             |             |             |             |             |             |             |             |             |             |
|--------|-------------|-------------|-------------|-------------|-------------|-------------|-------------|-------------|-------------|-------------|-------------|-------------|
| Q9Y646 | 386090      | 11630,31097 | 307776,6667 | 10203,55221 | 324726,6667 | 11159,29259 | 364086,6667 | 7049,303354 | 334430      | 8183,257298 | 338906,6667 | 1121,908097 |
| Q9Y678 | 834013,3333 | 22500,37506 | 530166,6667 | 147682,3025 | 681910      | 249675,6477 | 889163,3333 | 133852,6865 | 925583,3333 | 29537,10962 | 724570      | 75818,29792 |
| Q9Y696 | 562203,3333 | 34030,80484 | 613943,3333 | 15435,62366 | 545056,6667 | 39859,25502 | 691020      | 42571,46031 | 675860      | 39899,13449 | 592840      | 13041,22055 |
| Q9Y6C2 | 450536,6667 | 34522,14233 | 495363,3333 | 17376,77793 | 431150      | 26523,98977 | 544630      | 25906,20196 | 459760      | 11724,06499 | 431436,6667 | 12478,62216 |
| Q9Y6N5 | 385240      | 23339,463   | 363753,3333 | 12408,56872 | 420630      | 16485,93037 | 452753,3333 | 4902,19792  | 409630      | 39478,19947 | 398456,6667 | 17498,35453 |
